# Supplementary material for: Variation in brachiopod microstructure and isotope geochemistry under low pH–ocean acidification–conditions
Source: Copernicus journal article supplement (doi:10.5194/bg-2018-332), 2018-07-24
Supplement: Supplementary file 1 [file bg-2018-332-supplement.zip]

**Variation in brachiopod microstructure and isotope geochemistry under low pH–ocean acidification–conditions**

Facheng Ye1, Hana Jurikova2, Lucia Angiolini1, Uwe Brand3, Gaia Crippa1, Daniela Henkel2, Jürgen Laudien4, Claas Hiebenthal2, Danijela Šmajgl5

1Università degli Studi di Milano, Dipartimento di Scienze della Terra ‘A. Desio’, via Mangiagalli 34, Milano, 20133, Italy. E–mail: facheng.ye@unimi.it; lucia.angiolini@unimi.it; gaia.crippa@unimi.it

2GEOMAR Helmholtz-Zentrum für Ozeanforschung Kiel, Wischhofstr. 1–3, 24148 Kiel, Germany. E–mail: hjurikova@geomar.de; dhenkel@geomar.de; chiebenthal@geomar.de

3Department of Earth Sciences, Brock University, 1812 Sir Isaac Brock Way, St. Catharines, ON Canada L2S 3A1. E–mail: [ubrand@brocku.ca](mailto:ubrand@brocku.ca)

4Alfred-Wegener–Institut Helmholtz–Zentrum für Polar– und Meeresforschung, Bremerhaven, Germany. E–mail: [juergen.laudien@awi.de](mailto:juergen.laudien@awi.de)

5ThermoFisher Scientific, Hanna-Kunath-Str. 11, Bremen, Germany. E–mail: danijela.smajgl@thermofisher.com

**Abstract**

Throughout the last few decades and in the near future CO2–induced ocean acidification is potentially a big threat to marine calcite-shelled animals (e.g., brachiopods, bivalves, corals and gastropods). Despite the great number of studies focusing on the effects of acidification on shell growth, metabolism, shell dissolution and shell repair, the consequences on biomineral formation remain poorly understood, and only few studies addressed contemporarily the impact of acidification on shell microstructure and geochemistry. In this study, a detailed microstructure and stable isotope geochemistry investigation was performed on nine adult brachiopod specimens of *Magellania venosa* (Dixon, 1789), grown in the natural environment as well as in controlled culturing experiments at different pH conditions (ranging 7.35 to 8.15 ± 0.05) over different time intervals (214 to 335 days). Details of shell microstructural features, such as thickness of the primary layer, density and size of endopunctae and morphology of the basic structural unit of the secondary layer were analysed using scanning electron microscopy (SEM). Stable isotope compositions (δ13C and δ18O) were tested from the secondary shell layer along shell ontogenetic increments in both dorsal and ventral valves. Based on our comprehensive dataset, we observed that, under low pH conditions, *M. venosa* produced a more organic-rich shell with higher density of and larger endopunctae, and smaller secondary layer fibres, when subjected to about one year of culturing. Also, increasingly negative δ13C and δ18O values are recorded by the shell produced during culturing and are related to the CO2–source in the culture setup. Both the microstructural changes and the stable isotope results are similar to observations on brachiopods from the fossil record and strongly support the value of brachiopods as robust archives of proxies for studying ocean acidification events in the geologic past.

**Key words:**

*Magellania venosa*, biomineral, δ13C, δ18O, primary layer, secondary layer, endopunctae, scanning electron microscopy, culturing

**1 Introduction**

Since the industrial revolution the surface ocean pH has dropped by 0.1 units and will probably drop another 0.3–0.5 units by 2100 (Caldeira and Wickett, 2005; Orr et al., 2005; IPCC, 2013). This is due to the increasing amount of atmospheric carbon dioxide (CO2) absorbed by the ocean that extensively affects sea water carbonate chemistry (e.g., Caldeira and Wickett, 2003, 2005; Feely et al., 2004). Increased concentrations of anthropogenic CO2 are reflected in an elevated concentration of hydrogen ions, which lowers the pH and the available carbonate ions (Orr et al., 2005). Effects on marine organisms is of great scientific interest, both for understanding the geological past and for the consequences in the immediate future (e.g., Ries et al., 2009), as the decrease in calcium carbonate saturation potentially threatens marine organisms forming biogenic calcium carbonate (e.g., Orr et al., 2005; Guinott et al., 2006; Jantzen et al., 2013a, b; McCulloch et al., 2012). This applies to calcium carbonate shell–forming species, such as brachiopods and mollusks, because they are considered excellent archives documenting how changes in environmental conditions can affect marine organisms (e.g., Kurihara. 2008; Comeau et al., 2009; Watson et al., 2012, Hahn et al., 2012, 2014; Cross et al., 2015, 2016, 2018; Crippa et al., 2016a; Milano et al., 2016; Garbelli et al., 2017; Jurikova et al., in review).

Recently, several experiments were performed to investigate if a change of seawater pH may affect growth rate, shell repair and oxygen consumption of calcifying organisms, and how they respond to ocean acidification (Supplementary Table 1). However, despite the great number of studies, the consequences on biomineral formation remain not well understood, as most studies focused mainly on growth, metabolic rates, shell dissolution and shell repair (Supplementary Table 1, and references therein). Only a few studies deal with the effect of acidification on microstructure (Beniash et al., 2010; Hahn et al., 2012; Stemmer et al., 2013; Fitzer et al., 2014a, b; Milano et al., 2016), and all of them focused on bivalves and show that neither microstructure, nor shell hardness seem to be affected by seawater pH.

The few studies that examined brachiopods or brachiopod shells suggest that the latter suffered increased dissolution under lower seawater pH conditions, whereas the organism either exhibited no changes, or an increase in shell density [calculated as dry mass of the shell (g)/shell volume (cm3)], but otherwise no changes in shell morphology and trace chemistry (Table 1). Overall, there appears to be little to no effect on brachiopod morphology or chemistry with lower seawater pH (Cross et al., 2015, 2016, 2018).

Table 1. Culturing, dissolution experiments and natural variation on several brachiopod species and shells.

| Species  N (number of sample) | Growth Parameters | Shell repair/Microstructure/Oxygen consumption/Dissolution of shell/Microstructure | Method & Material | Environment/conditions  T=Temperature (℃)  S=Salinity (PSU)  *p*CO2 (μatm) | Duration of experiment | Source |
| --- | --- | --- | --- | --- | --- | --- |
| *Calloria inconspicua* (Sowerby, 1846)  N = 123 | 1) >3 mm in length undamaged individuals were not affected  by lower pH;  2) <3 mm in length undamaged individuals grew faster at pH 7.62 than the control conditions | Not affected by lower pH (>80% of all damaged individuals repaired after 12 weeks) | Culture experiment | a) pH 8.16, T 16.5, S 33.9, *p*CO2 465, Ω calcite 3.5  b) pH 7.79, T 16.9, S 33.9, *p*CO2 1130, Ω calcite 1.6  c) pH 7.62, T 16.6, S 33.9, *p*CO2 1536, Ω calcite 1.3 | 12 weeks | Cross et al., 2016 |
| *Calloria inconspicua* (Sowerby, 1846)  N= 389 (adults) |  | Punctae width decreased by 8.26%, shell density increased by 3.43%, no change in shell morphology, punctae density, shell thickness, and shell elemental composition (Ca, Mg, Na, Sr and P) | One specimen collected every decade from one locality | Last two decades pH reduced 0.1 unit  Temperature varied from 10.7–13.0 ℃  *p*CO2 varied from 320-400  Salinity and Ω of calcite not provided | 120–year record | Cross et al., 2018 |
| *Liothyrella uva* (Broderip, 1833)  N = 156 | Not affected by lower pH | Not affected by either low pH conditions or temperature.  (>83% of individuals repaired after 7 months) | Culture experiment | a) pH 7.98, T -0.3, S 35, *p*CO2 417, Ω calcite 1.20  b) pH 8.05, T 1.7, S 35, *p*CO2 365, Ω calcite 1.49  c) pH 7.75, T 1.9, S 35, *p*CO2 725, Ω calcite 0.78  d) pH 7.54, T 2.2, S 35, *p*CO2 1221, Ω calcite 0.50 | 7 months | Cross et al., 2015 |
| *Liothyrella uva* (Broderip, 1833)  Npost-mortem = 5 | Not applicable | Higher dissolution in gastropods and brachiopods at lower pH after 14 days | Empty shells | a) pH 7.4, T 4, S 35, Ω calcite 0.74  b) pH 8.2, T 4, S 35, Ω calcite 4.22  *p*CO2 Not provided | 14 to 63 days | McClintock et al., 2009 |

Brachiopods possess a low-magnesium calcite shell, which should be more resistant to elevated *p*CO2 compared to the more soluble forms of CaCO3, aragonite and high-Mg calcite (Morse et al., 2007). The shell microstructure of Rhynchonelliformean brachiopods has been used as a powerful tool to understand the biomineral response to modern global acidification and similar events in the past (Payne and Clapham, 2012; Cross et al., 2015, 2016; Garbelli et al., 2017). A comprehensive study focusing on fossil brachiopods during the end-Permian extinction showed that brachiopods tend to produce shells with higher organic components during ocean acidification events (Garbelli et al., 2017).

Here, the microstructure and stable isotope geochemistry are described of the shells of adult brachiopod specimens of the cold-temperate brachiopod species *M. venosa* (Dixon, 1789) are described. The organisms grew in the natural environment and in culture under different pH conditions. *M. venosa* represents the largest recent brachiopod species, and locally may be abundant (Försterra et al., 2008), and it has the highest growth rate recorded for recent brachiopods (Baumgarten et al., 2014). Its low-magnesium calcite shell consists of a microgranular primary layer and a fibrous secondary layer (Smirnova et al., 1991; Baumgarten et al., 2014; Romanin et al., 2018; Casella et al. 2018) crossed by perforations, the endopunctae.

Since little is known about morphological and geochemical responses to increased ocean acidification in brachiopods (cf, Table 1), the main goal of this study is to document any changes in this highly important archival marine organism. It will be described if and how shell microstructural features such as the primary layer thickness, density of endopunctae and fibre morphology, and their stable carbon (δ13C) and oxygen (δ18O) isotope compositions respond to low seawater pH conditions.

**2 Materials and methods**

2.1 Brachiopod samples and culturing set-up

A thorough description of the brachiopod sampling and culturing is provided in Jurikova et al. (in review), but an abbreviated version here is provided. Nine adult individuals of *M. venosa* (Dixon, 1789) were chosen for microstructure investigation and an evaluation of their δ13C and δ18O values (Table 2). All specimens were collected by scientific SCUBA divers alive from appr. 20 m water depth of Comau Fjord (Chile) at different localities (Figure 1). Specimens #158 and #223 did not experience any treatment after collection from Comau Fjord. All other specimens, #43 (pH3), #63 (pH4), #8004 (pH0), #8005 (pH0), #9004 (pH1 and pH2), #9005 (pH1 and pH2) and #9006 (pH1 and pH2), were cultured under different pH conditions (Table 2 and Table 3) at either AWI in Bremerhaven or GEOMAR (at KIMOCC–Kiel Marine Organisms Culture Centre) in Kiel, Germany.

Table 2. Specimens of *M. venosa* sampled from Comau Fjord, Chile, and natural and experimental culturing conditions.

| Sample ID | Sample locality at Comau Fjord (Chile)① | Sample seawater conditions② | Date of collection | Length of ventral valve (mm) | Duration of experiment | Experimental conditions |
| --- | --- | --- | --- | --- | --- | --- |
| #43 | Lilliguapi | pH: ~7.9  T: ~13  S: ~32  D: 20 | Feb. 2012 | 37 | 214 days③ | *p*CO2: 1391, pH: 7.66 ± 0.04  T: 11.62 ± 0.54, S: 32.58  Ωcal: 1.97 |
| #63 | Lilliguapi | pH: ~7.9  T: ~13  S: ~32  D: 20 | Feb. 2012 | 23 | 214 days③ | *p*CO2: 2611, pH: 7.44 ± 0.08  T: 11.69 ± 0.45, S: 32.65  Ωcal: 1.37 |
| #158 | Huinay Dock | pH: ~7.9  T: ~13  S: ~32  D: 20 | Dec. 2011 | 36 | no |  |
| #223 | Cahuelmó | pH: ~7.9  T: ~13  S: ~32  D: 23 | Feb. 2012 | 30 | no |  |
| #8004 | Comau Fjord | pH: ~7.9  T: ~13  S: ~32  D: 21 | Apr. 2016 | 31 | 335 days④ | *p*CO2: 600 ,pH: 8.00–8.15 ± 0.05  T: ~10, S: 30, Ωcal: 2.0–3.5 |
| #8005 | Comau Fjord | pH: ~7.9  T: ~13  S: ~32  D: 21 | Apr. 2016 | 46 | 335 days④ | *p*CO2: 600, pH: 8.00–8.15 ± 0.05  T: ~10, S: 30, Ωcal: 2.0–3.5 |
| #9004 | Comau Fjord | pH: ~7.9  T: ~13  S: ~32  D: 21 | Apr. 2016 | 41 | 335 days④ | *p*CO2: 2000–4000⑤  pH: 7.60 ± 0.05 to 7.35 ± 0.054  T: ~10, S: 30, Ωcal: 0.6–1.1 |
| #9005 | Comau Fjord | pH: ~7.9  T: ~13  S: ~32  D: 21 | Apr. 2016 | 25 | 335 days④ | *p*CO2: 2000–4000⑤  pH: 7.60 ± 0.05 to 7.35 ± 0.054  T: ~10, S: 30, Ωcal: 0.6–1.1 |
| #9006 | Comau Fjord | pH: ~7.9  T: ~13  S: ~32  D: 21 | Apr. 2016 | 43 | 335 days④ | *p*CO2: 2000–4000⑤  pH: 7.60 ± 0.05 to 7.35 ± 0.054  T: ~10, S: 30, Ωcal: 0.6–1.1 |

Note: D: Depth (m), T: temperature (°C), S: salinity (PSU – practical salinity units), *p*CO2 (μatm).

①Cahuelmó 42°15'23'' S, 72°26'42'' W, Cross–Huinay 42°23'28'' S, 72°27'27'' W, Jetty (Huinay Dock) 42°22'47'' S, 72°24'56'' W, Lilliguapy 42°9'43'' S, 72°35'55'' W, samples #8004, #8005, #9004, #9005, #9006 were harvested from three sites in Comau Fjord (Cross–Huinay, Jetty, and Liliguapy), Chilean Patagonia

②Reference: Laudien et al. (2014) and Jantzen et al. (2017)

③Culture experiments conducted at the Alfred–Wegener–Institut Helmholtz–Zentrum für Polar–und Meeresforschung, Bremerhaven, Germany

④Culture experiments conducted at GEOMAR Helmholtz–Zentrum für Ozeanforschung Kiel, Germany (Jurikova et al., in review)

⑤CO2 concentration was changed during the experiment: from 4 August 2016 to 18 April 2017 at 2000 μatm and from 18 April 2017 till 5 July 2017 at 4000 μatm

Table 3. Culture and sensor systems for *M. venosa* specimens (#43, #63, #8004, #8005, #9004, #9005 and #9006). Operated under controlled experimental settings in a climate control laboratory at the Alfred–Wegener–Institut Helmholtz–Zentrum für Polar–und Meeresforschung, Bremerhaven, Germany and at GEOMAR Helmholtz–Zentrum für Ozeanforschung Kiel, Germany.

|  | Culture system at AWI | Automated sensor Systems at AWI | Culture system at GEOMAR | Automated sensor Systems at GEOMAR |
| --- | --- | --- | --- | --- |
|  | Aquarium (150 L/each pH treatment) |  | Aquarium (150 L/each pH treatment) |  |
|  | Supplied from a reservoir tank (twice a week 20 % water was replaced) |  | Supplied from a reservoir tank (twice a month 10 % water was replaced) |  |
| Temperature | Controlled in temperature constant room |  | Controlled using heaters or coolers | Temperature Sensor Pond |
| *p*CO2 | Bubbling of CO2  pH 7.66 ± 0.04,  pH 7.44 ± 0.08 | COMPORT, Dennerle, Vinningen; IKS aquastar Aquarium computer V2.xx with Aquapilot 2011 | Bubbling of CO2 enriched air | CONTROS HydroC® underwater CO2 sensor |
| Salinity | Mixing Reef commercial sea-salt (until October: Aqua Medic, Bissendorf, Germany, thereafter Dupla Marin Reef Salt, Dohse Aquaristik, Grafschaft-Gelsdorf, Germany) with deionized water (Atkinson and Bingman, 1998) | Conductivity Electrode | Mixing Tropic Marin Pro-Reef commercial sea-salt with deionized water (Atkinson and Bingman, 1998) | Conductivity Electrode |
| Filtering | Biofilter, protein skimmer and UV sterilizer |  | Biofilter, protein skimmer and UV sterilizer |  |
| Food | Regularly fed (typically 5 times per week) with Dupla Rin, Coral Food, Reef Pearls 5–200µm, alive *Thalassiosira weissflogii,* and 1d old nauplii of *Artemia salina* |  | Regularly fed (typically 5 times per week) with *Rhodomonas baltica* |  |
| Substrate | Sabia Corallina, 7–8mm, Dohse Aquaristik, Grafschaft–Gelsdorf, Germany |  | No |  |


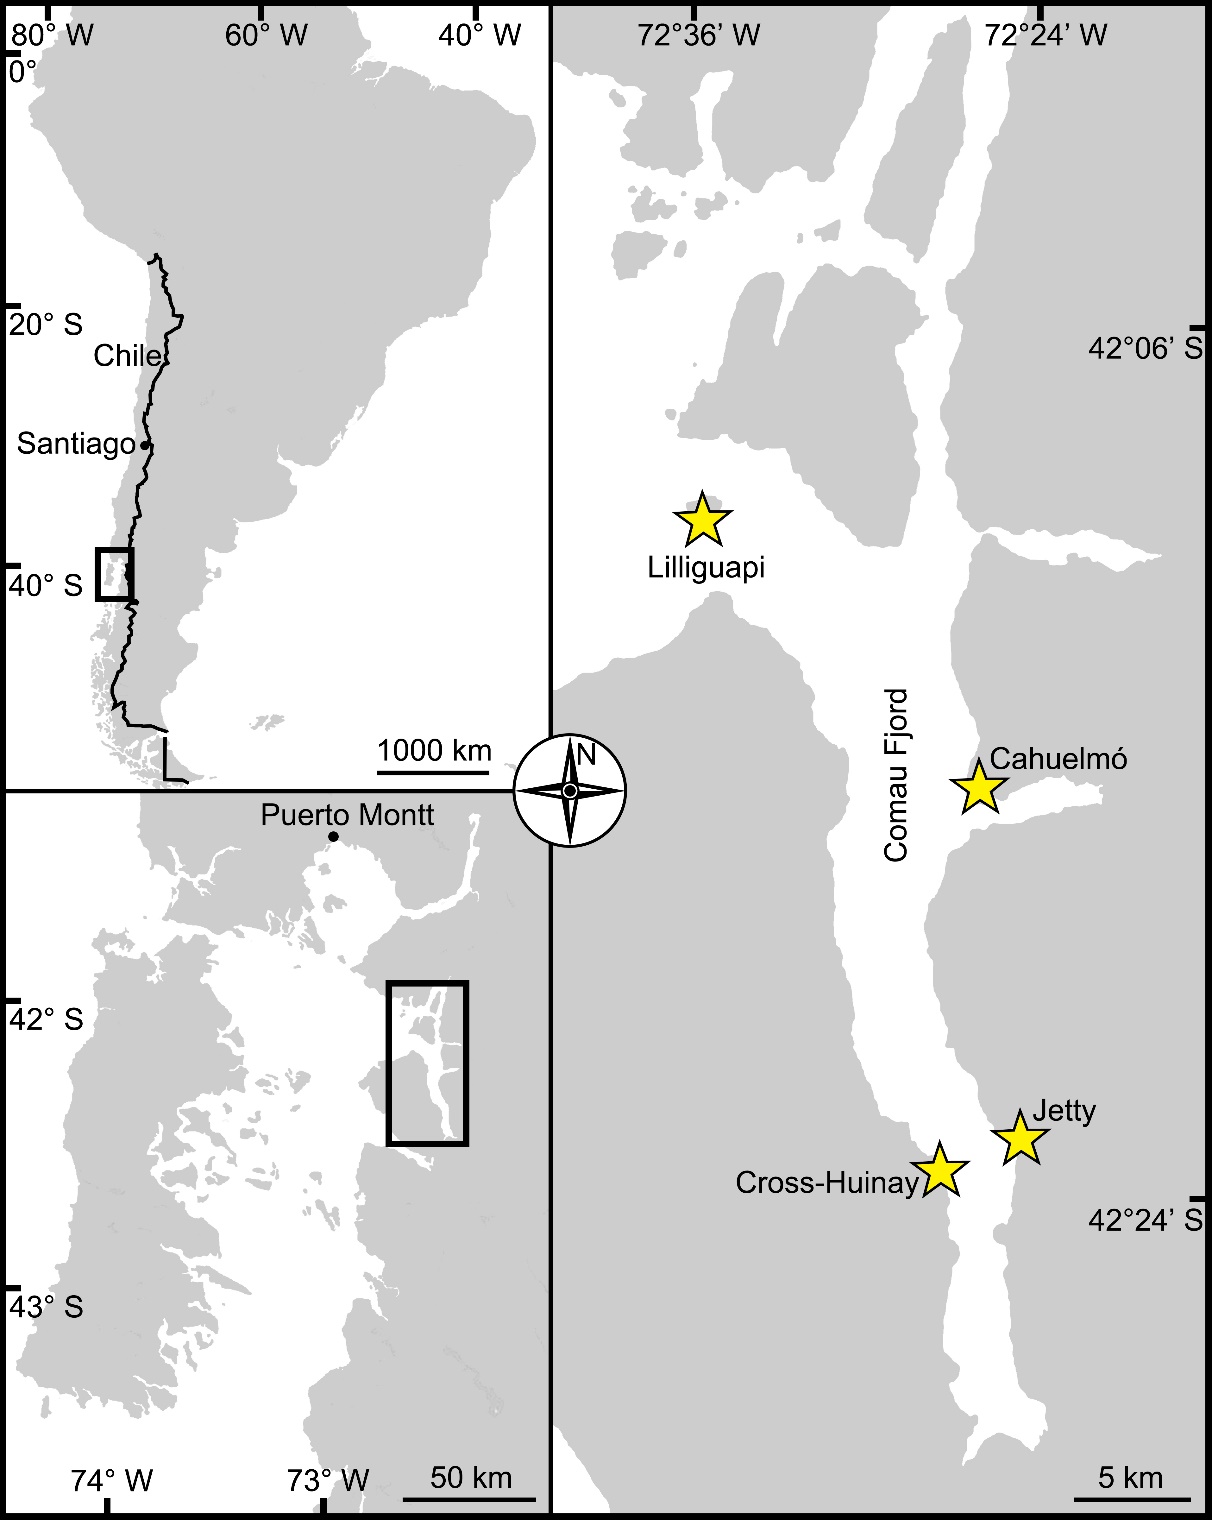


Figure 1. Map of Comau Fjord. Upper left map: Overview of Chilean Patagonia. Lower left map: Gulf of Ancud with connection in the North and South to the Pacific Ocean. Right hand map: Fjord Comau with localities of brachiopod sample collection. In both maps the rectangle marks the location of Comau Fjord.

In summary, *M. venosa* individuals sampled in Chile were transported to Germany and cultured under controlled environmental setting in a climate laboratory. As a culture medium we used artificial seawater, which was prepared by mixing a commercial salt with deionized water until the desired salinity and chemical composition was achieved. An overview of the culturing setup at both laboratories is available in Table 3. Brachiopods were first left to acclimatize, and prior to the start of experimental treatments labelled using a fluorescent dye – calcein (Sigma, CAS 1461–15–0; 50 mg/l for 3 h) (e.g., Baumgarten et al., 2013; Jurikova et al., in review). Specimens #43 and #63 were cultured at AWI at pH3 = 7.66 (*p*CO2 = 1390 μatm) and pH4 = 7.44 (*p*CO2 = 2610 μatm) from 29th August 2013 to 31th March 2014 respectively. Specimens #8004, #8005, #9004, #9005 and #9006 were cultured concurrently at GEOMAR under control or low pH conditions. Specimens #8004 and #8005 were maintained under control settings (pH0 = 8.0/8.15) from 4th August 2016 to 5th July 2017, conditions similar to the fjord habitat. In contrast, specimens #9004, #9005 and #9006 were cultured under low–pH artificial seawater conditions. Low–pH conditions were mediated by additional bubbling of CO2 at AWI, and CO2-enriched air at GEOMAR (Table 3). The acidification experiment was performed in two phases; the first one from 4th August 2016 to 18th April 2017 during which the *p*CO2 was set to 2000 μatm (corresponding to a pH1 = 7.60), and the second one during which the *p*CO2 was set to 4000 μatm (corresponding to a pH2 = 7.35) from 18th April 2017 to 5th July 2017. In order to distinguish between the shell parts participated under the specific pH conditions as well as to allow exact comparison to shells from the control treatment, calcein marking was carried out prior to the second low–pH phase (i.e. before the 4000 μatm experiment). Parts of the shell grown under specific pH conditions are indicated in Figure 2. In addition to the calcein marking, newly grown shell parts may be distinguished from visible growth lines on the surface of the shell (Figure 2). The total length (defined as maximum distance from the blue line to the anterior margin) of the curved dorsal and ventral valves grown during the 11 months of culturing (Figure 2) varied from < 5 mm to 15.6 mm (Table 4).


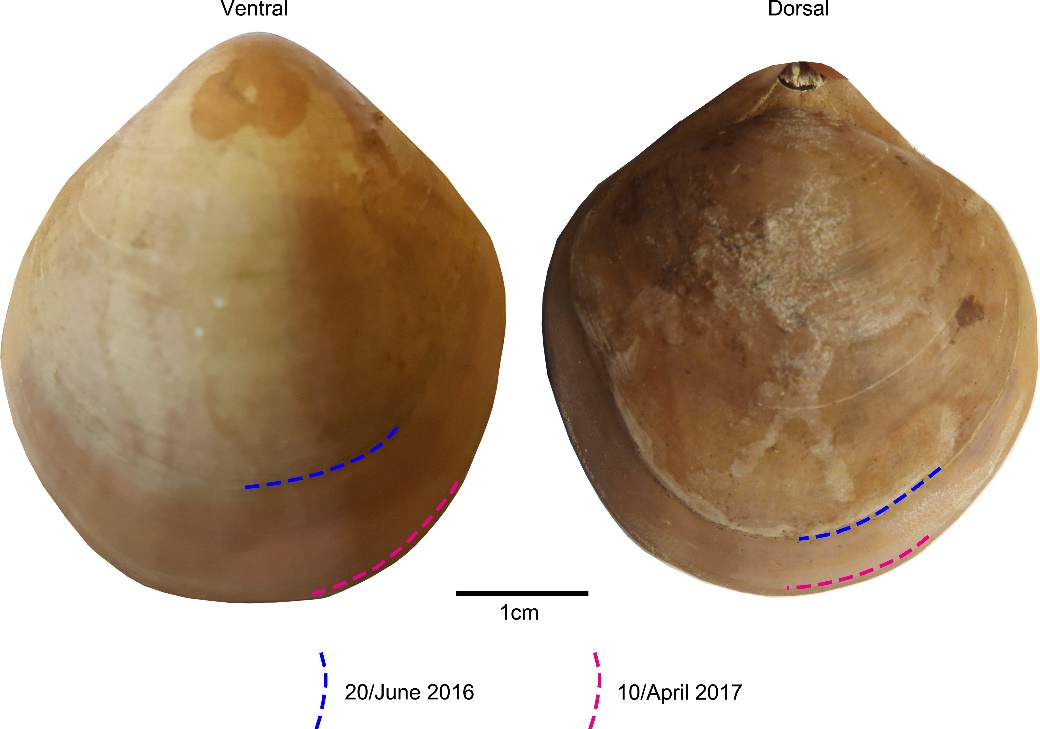


Figure 2. Growth lines marked with calcein on the surface of the brachiopod specimens (#9006).

Table 4. Total shell length of three specimens of *M. venosa* before, during and at the end of the in vitro culturing.

| Sample | Initial anterior–posterior length (mm) | Length–Duration (a)  257 Days (mm) | Length–Duration (b)  78 Days (mm) |
| --- | --- | --- | --- |
| #8004 ventral | 31 | 14 (pH0) | 1.6 (pH0) |
| #8005 ventral | 46 | 5 (pH0) | <1 (pH0) |
| #8005 dorsal | 41 | 4 (pH0) | <1 (pH0) |
| #9004 ventral | 41 | 13 (pH1) | 1.2 (pH2) |
| #9005 ventral | 25 | 12 (pH1) | 1.8 (pH2) |
| #9006 ventral | 43 | 9 (pH1) | <1 (pH2) |
| #9006 dorsal | 38 | 8 (pH1) | <1 (pH2) |

Note: (a) Culturing from 4 August 2016 to 18 April 2017; (b) Culturing from 18 April 2017 to 5 July 2017; pH0 = 8.00–8.14, pH1 = 7.60, pH2 = 7.35.

2.2 Microstructural Analysis

This study followed the sample preparation method for recent shells suggested by Crippa et al. (2016b). In order to obtain more detailed data on microstructural changes, the samples were cut with a diamond blade along different axes and directions (Figure 3A). Subsequently, the samples were immersed in 36 volume hydrogen peroxide (H2O2)for 24 to 48 hours to remove the organic components. The sectioned surfaces were manually smoothed with 1200 grit sandpaper, then quickly (3 seconds) cleaned with 5% hydrochloric acid (HCl), immediately washed with tap water and air-dried. Finally, the valve sections were gold–coated and analysed by a Cambridge S–360 scanning electron microscope with a lanthanum hexaboride (LaB6) source operating at an acceleration voltage of 20 kV (Dipartimento di Scienze della Terra “A. Desio”, Università di Milano).


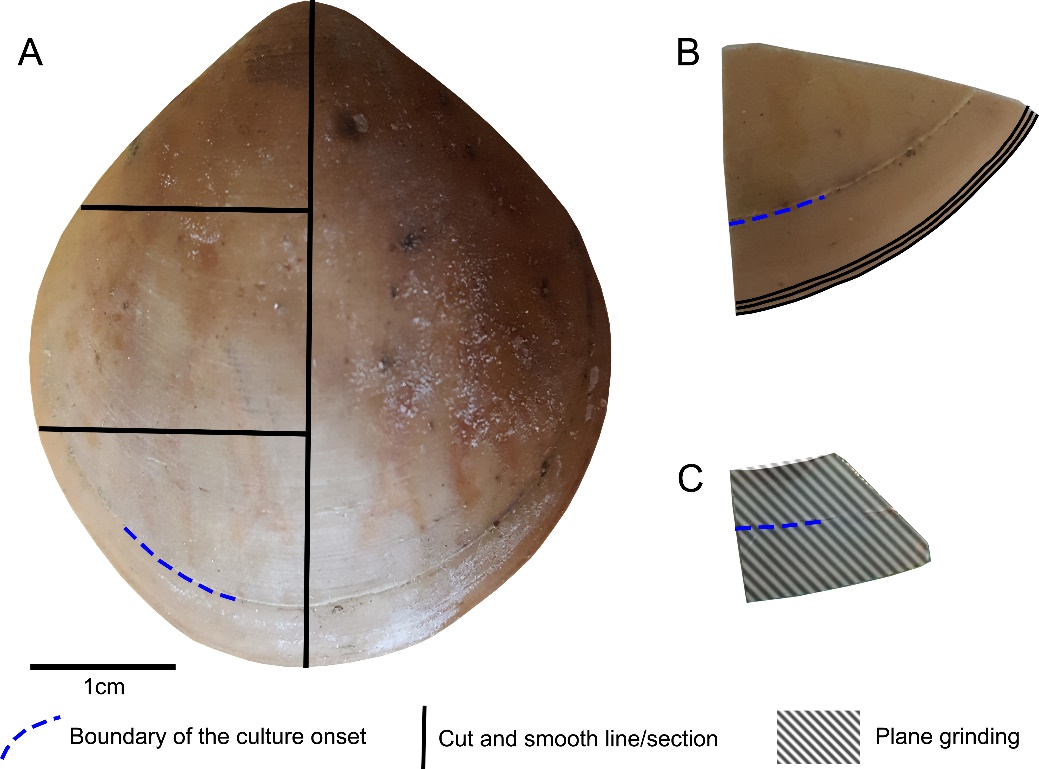


Figure 3. Brachiopod shell sample cut along different axes. A, longitudinal and transverse sections; B, transverse sections at the anterior margin of the shell; C, plane grinding of the external surface of the shell.

The methods described by Ye et al. (2018a) were followed to investigate the basic microstructural units (fibres) in SEM images. We focused primarily on the anterior margin of the valves, the part that was produced during culturing (hereinafter referred to as *during*–*culturing*) under different pH conditions. Therefore, additional transverse sections along the growth lines were obtained in the most anterior part (black lines in Figure 3B) by manually smoothing with 1200 grit sandpaper. Plane grinding was performed on the external surface of the shell (Figure 3) to investigate the distribution of endopunctae.

The thickness of the primary layer was measured on the SEM images of specimens #8005 and #9006 (Figure 4A) in different positions along the longitudinal growth axis (posterior, central and anterior regions). In the vicinity of the transition from natural growth to cultured growth, the region was further subdivided into four sub-zones.

To calculate and measure the density and diameter (max) of endopunctae, squares (800 μm×800 μm) were located randomly over the smoothed external surface of the anterior shell (Figure 4B). Four sub-zones (C2, A1, A2, A3) were defined according to their position along the posterior-anterior direction, while distinguishing the part of the shell produced *before-culturing* and that produced *during-culturing*.


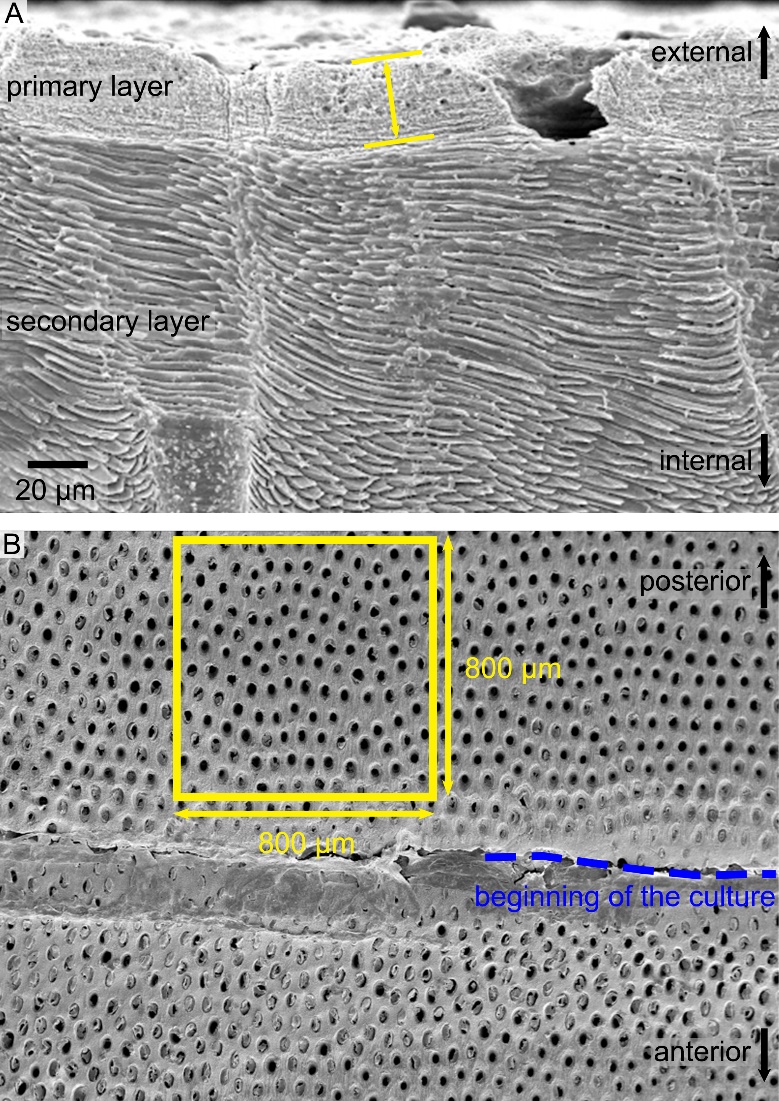


Figure 4. Measurement methods used for the thickness of primary layer and the density of the endopunctae. Note that for the latter, endopunctae were counted when included for more than their half diameter inside the square.

For morphometric analyses, fibres were manually outlined using polygonal lasso in Adobe Photoshop CS6, and size and shape parameters were measured with Image-Pro Plus 6.0 and ImageJ (for convexity). In particular, following Ye et al. (2018a, b) we measured/calculated the Feret diameter (max), Area, Roundness [4Area/π × Feret diameter (max)2] and Convexity (Convex Perimeter/Perimeter). The width of an individual fibre roughly corresponds to the Feret diameter (max), whereas its height corresponds to the Feret diameter (min) (see Figure 6 in Ye et al., 2018a).

As individual fibres are irregular in shape in the most anterior sections of brachiopods, the morphometric measurement method proposed by Ye et al. (2018a, b) is not always suitable. Thus, modifications had to be made to Ye et al. (2018a, b) measurement method to make the comparative morphometric analysis of the fibres more robust (Figure 5A, 5B). First, all SEM images were oriented in the same direction with the base of the primary layer facing upwards. Then a uniform size zone (20 μm × 20 μm) was selected for additional measurements with the upper side of the square always placed at the boundary between the primary and the secondary layers (Figure 5C). Two new methods were developed and were then applied: for Method 1, the width of fibres crossed by two standard lines was measured, which were always located in the same position and at the same distance in all the selected zones (yellow and orange lines in Figure 5 method 1). For Method 2, we calculated the number of boundaries based on the number of fibres crossed by the two standard lines (Figure 5 method 2). Samples were named according to the following nomenclature, the most anterior transection zone of the ventral valve was named Z1, the second most anterior transection zone of the ventral valve Z2 and so on, the most anterior transection zone of the dorsal valve was named Z4; The standard line facing towards the primary layer was named “1” and the second standard line “2” (example: “Z1–1” is the sample of the standard line facing towards the primary layer at the most anterior transection zone of the ventral valve).


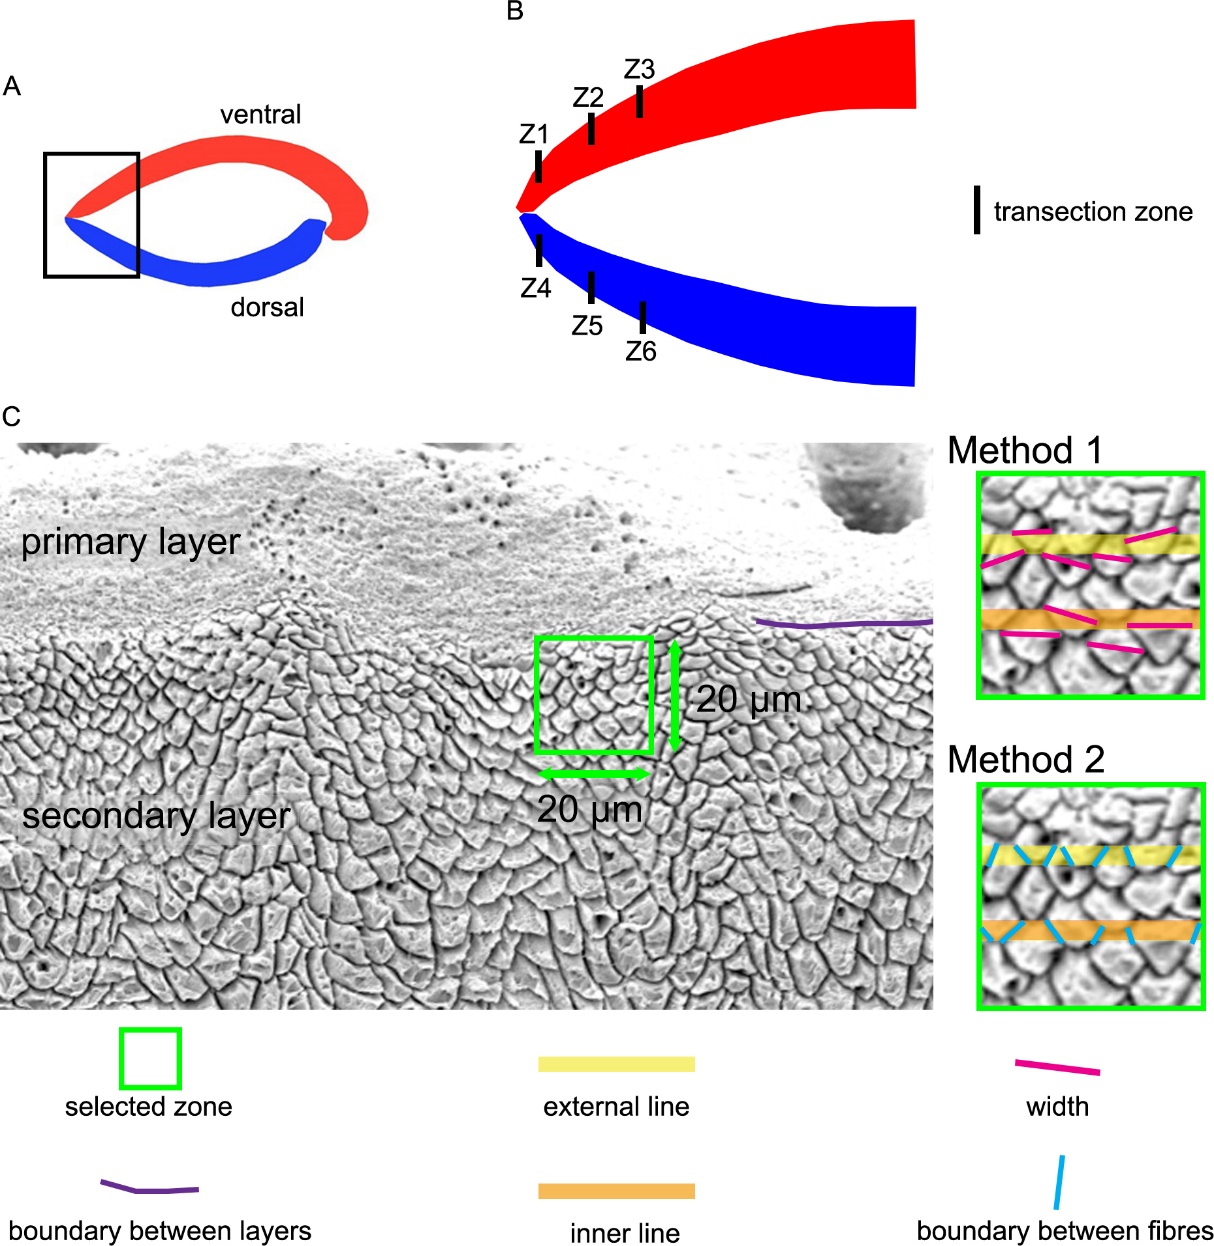


Figure 5. Methods of measurements used in the anterior transverse sections. All SEM images are oriented in the same direction: base of the primary layer facing upwards. A square (20 μm × 20 μm) with its upper side just overlapping the boundary between the primary and secondary layer was analysed. Method 1, refers to the measurement of the width of the fibres crossed by two standard lines, which were located in the same position and at the same distance in all 194 squares analysed (yellow and orange lines); Method 2, calculation of the numbers of boundaries between the fibres, which are crossed by two standard lines were carried out.

2.3 Carbonate stable isotopes analyses

Cleaned shells of specimens #8004, #8005, #9004, #9005 and #9006 were chosen for carbon and oxygen isotope analyses. For specimens #8005 and #9006, the primary layer and surface contaminants were manually and chemically removed by leaching with 10 % HCl, rinsed with distilled water and air–dried. Individual growth increments exclusively come from the secondary layer, and were separated from the shell in both dorsal and ventral valves using a WECHEER (WE 248) microdrill with tungsten-carbide milling bit. Shell increment fragments, of similar width, were then powdered using an agate mortar and pestle. For carbon and oxygen isotope analyses about 250 μg of powdered calcite of each sample was analysed with a Finnigan GasBench connected to a Delta V (Thermo Fisher Scientific Inc., Waltham, Massachusetts, USA) mass spectrometer at the Dipartimento di Scienze della Terra, Università degli Studi di Milano, Italy. Isotope values (δ18O, δ13C) are reported as per mil (‰) deviations of the isotopic ratios (18O/16O, 13C/12C) calculated to the V-PDB scale using a within-run laboratory internal standard (MAMI) calibrated against the International Atomic Energy Agency 603 (IAEA-603; δ18O: -2.37 ± 0.04 ‰, δ13C: +2.46 ± 0.01 ‰) and NBS 18 (δ18O: -23.2 ± 0.1 ‰, δ13C: -5.014 ± 0.035 ‰) standards. Analytical reproducibility (1σ) for these analyses was better than 0.04‰ for δ13C and 0.1‰ for δ18O (Appendix 1). Another set of shells, #8004, #9004 and #9005, were gently rinsed with ultra pure water (Milli–Q) and dried for a few days on a hotplate at 40 °C in a clean flow hood. Targeted parts of the shell were sampled for powder under binoculars using a precision drill (Proxxon) with a mounted dental tip. Stable isotope analyses of powders of these specimens were performed at GEOMAR, Kiel on a Thermo Finnigan MAT 252 mass spectrometer coupled online to an automated Kiel carbonate preparation line. The external reproducibility (1σ) of in-house carbonate standards was better than ± 0.1 ‰ and ± 0.08 ‰ for δ13C and δ18O, respectively (Appendix 2).

2.4 Stable isotopes analyses of water samples

In addition to carbon and oxygen isotope analyses of shells, analyses were also carried out on seawater samples collected from the culturing tanks. Measurements of δ13CDIC and δ18OH2O were performed using Thermo Scientific™ Delta Ray™ IRIS with URI Connect.

Isotope values (δ13C, δ18O) are reported as per mil (‰) deviations of the isotopic ratios (13C/12C, 18O/16O) calculated to the VPDB scale for δ13C and VSMOW scale for δ18O values. Analytical reproducibility (1σ) on 3 aliquots of each water sample, was ≤ 0.03‰ for both δ13C and δ18O values (Appendix 3).

**3 Results**

3.1 Primary layer thickness

The thickness of the primary layer was measured at different positions along the shell from the posterior (umbonal) region to the *before-culturing* portion and finally to the anterior valve margin (Figure 6). Generally, in the posterior part of *M. venosa,* the primary layer is missing, or it has the lowest recorded thickness. Then the primary layer progressively thickens toward the central and anterior parts. The thickest primary layer within the same valve is always located just before the beginning of the culture (*before-culturing* portion, Table 5). During culturing the thickness of the primary layer decreases. A most distinct change was observed in specimen #9006 cultured at the lowest pH condition (pH1: pH 7.6, and pH2: pH 7.35) followed by another progressive increase in both valves *during*–*culturing*. In contrast, the thickness of the primary layer of the control condition specimen (#8005) remained stable (dorsal valve) or slightly decreased (Figure 6, ventral valve; Table 5).

Table 5. Statistical comparison of thickness of the primary layer (μm) along the ontogenetic direction of both valves of specimens #8005 and #9006. ①: Specific positions see Figure 6. N = number of measurement. Significant values (*p*–value ≤ 0.05) are marked in bold style.

| Sample | Position① | N | Mean | STD | Min | Max | *p*-values | *p*-values |
| --- | --- | --- | --- | --- | --- | --- | --- | --- |
| #8005 dorsal | P | 4 | 11.82 | 1.05 | 10.55 | 13.02 | P vs C1 0.755  C1 vs C2 **< 0.001**  C2 vs A1 **0.033**  A1 vs A2 0.726  A2 vs A3 NA | #8005DP vs #9006DP 0.120  #8005DC1 vs #9006DC1 **< 0.001**  #8005DC2 vs #9006DC2 **< 0.001**  #8005DA1 vs #9006DA1 0.088  #8005DA2 vs #9006DA2 0.101  #8005DA3 vs #9006DA3 NA  #8005VP vs #9006VP NA  #8005VC1 vs #9006VC1 0.123  #8005VC2 vs #9006VC2 0.194  #8005VA1 vs #9006VA1 **< 0.001**  #8005VA2 vs #9006VA2 **0.007**  #8005VA3 vs #9006VA3 **0.027** |
| C1 | 8 | 11.40 | 2.29 | 8.50 | 15.05 |
| C2 | 10 | 28.99 | 4.79 | 22.15 | 36.65 |
| A1 | 8 | 24.36 | 2.52 | 19.80 | 27.06 |
| A2 | 7 | 24.83 | 2.15 | 21.67 | 27.94 |
| A3 | 1 | 21.77 | NA | NA | NA |
|  |  |  |  |  |  |  |  |
| #8005 ventral | P | 2 | 17.64 | 2.36 | 15.28 | 20 | P vs C1 NA  C1 vs C2 **< 0.001**  C2 vs A1 **0.028**  A1 vs A2 0.289  A2 vs A3 **0.017** |
| C1 | 6 | 13.68 | 3.96 | 8.50 | 20.52 |
| C2 | 8 | 47.57 | 2.49 | 42.55 | 50.27 |
| A1 | 8 | 44.18 | 2.68 | 38.33 | 47.98 |
| A2 | 6 | 42.09 | 3.85 | 36.06 | 45.04 |
| A3 | 4 | 34.09 | 3.51 | 29.63 | 37.52 |
|  |  |  |  |  |  |  |  |
| #9006 dorsal | P | 7 | 9.08 | 2.77 | 5.56 | 14.64 | P vs C1 **< 0.001**  C1 vs C2 **< 0.001**  C2 vs A1 **< 0.001**  A1 vs A2 0.779  A2 vs A3 0.096 |
| C1 | 10 | 18.78 | 2.04 | 16.90 | 22.50 |
| C2 | 11 | 46.91 | 5.22 | 35.92 | 55.86 |
| A1 | 10 | 28.83 | 6.65 | 19.04 | 39.93 |
| A2 | 8 | 28.06 | 4.03 | 22.50 | 36.69 |
| A3 | 4 | 32.84 | 3.55 | 29.10 | 38.65 |
|  |  |  |  |  |  |  |  |
| #9006 ventral | P | 7 | 9.78 | 1.72 | 6.07 | 11.79 | P vs C1 **< 0.001**  C1 vs C2 **< 0.001**  C2 vs A1 **< 0.001**  A1 vs A2 0.102  A2 vs A3 **0.008** |
| C1 | 9 | 16.75 | 2.77 | 12.61 | 21.29 |
| C2 | 12 | 45.16 | 4.34 | 35.09 | 51.40 |
| A1 | 11 | 36.92 | 3.82 | 26.62 | 42.54 |
| A2 | 4 | 32.95 | 2.91 | 30.84 | 37.95 |
| A3 | 5 | 40.55 | 2.63 | 37.78 | 45.23 |


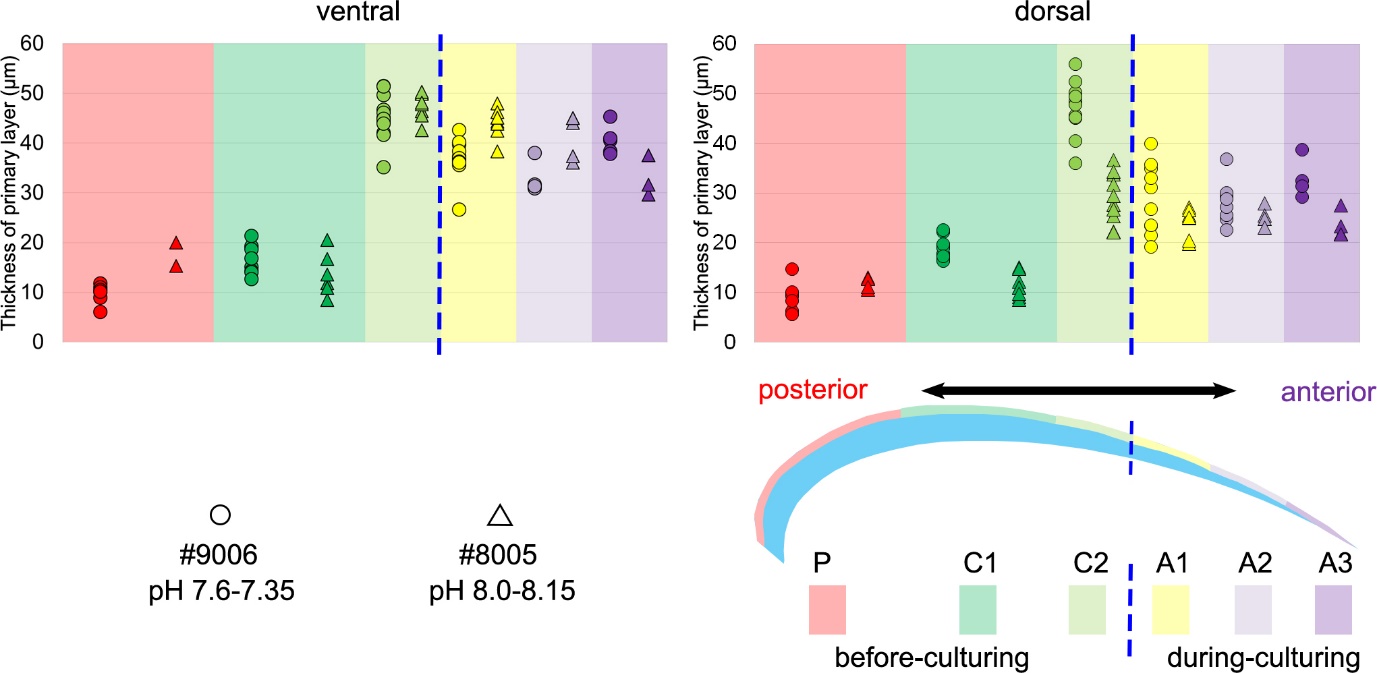


Figure 6. Variations of the thickness of the primary layer (ventral and dorsal valve) of a *M. venosa* specimen cultured at pH 7.35 and 7.6 (#9006) and a specimen cultured at pH 8.0 - 8.15 (#8005).

3.2 Endopunctae density and size

On the externally–ground surface of the anterior part, the total number and the diameter (max) of endopunctae in a squared frame (800 μm × 800 μm) was measured in four zones of the *before-culturing* and ofthe *during*–*culturing* parts of the shell (Figure 7). Generally, the density of endopunctae gradually increases along the selected transect (from ca. 185 /mm2 to ca. 305 /mm2 in ventral valve and from ca. 220 /mm2 to ca. 280 /mm2; Table 6). The size of endopunctae increases along the selected transect in the ventral valve (from ca. 17 μm to 33 μm; Table 7), but it slightly decreases in the dorsal valve (from ca. 36 μm to ca. 21 μm; Table 7). These trends are observed in both specimens cultured at different pH conditions. However, it is worth noting that in the most anterior part (*during*–*culturing*) of the ventral valve of #9006 (cultured at pH2: pH 7.35), the density of endopunctae sharply increases and their diameter reaches the maximum recorded values (Table 6).

Table 6. Statistical comparison of the number of endopunctae (per mm2) on both valves of #8005 and #9006. ①: Specific zones see to Figure 7. N = number of measurement.

| Sample | Zone① | N | Mean | STD | Min | Max |
| --- | --- | --- | --- | --- | --- | --- |
| #8005 dorsal | C2 | 3 | 236 | 8.6 | 225 | 250 |
| A1 | 1 | 280 | NA | NA | NA |
| A2 | 2 | 244 | 12.5 | 231 | 256 |
| A3 | 2 | 281 | 14 | 267 | 295 |
|  |  |  |  |  |  |  |
| #8005 ventral | C2 | 2 | 225 | 1.6 | 223 | 227 |
| A1 | 1 | 242 | NA | NA | NA |
| A2 | 2 | 241 | 5.5 | 236 | 247 |
| A3 | 2 | 269 | 6.3 | 263 | 275 |
|  |  |  |  |  |  |  |
| #9006 dorsal | C2 | 2 | 221 | 8.6 | 213 | 230 |
| A1 | 1 | 269 | NA | NA | NA |
| A2 | 2 | 250 | 3.1 | 247 | 253 |
| A3 | 2 | 266 | 3.1 | 263 | 269 |
|  |  |  |  |  |  |  |
| #9006 ventral | C2 | 2 | 186 | 3.1 | 183 | 189 |
| A1 | 1 | 234 | NA | NA | NA |
| A2 | 2 | 230 | 4.7 | 225 | 234 |
| A3 | 2 | 308 | 1.6 | 306 | 309 |

Table 7. Statistical comparison of the diameter (max) (μm) of endopunctae on both valves of #8005 and #9006. ①: Specific zones see Figure 7. N = number of measurement. Significant values (*p*-value ≤ 0.05) are marked in bold style.

| Sample | Zone① | N | Mean | STD | Min | Max | *p*-values | *p*-values |
| --- | --- | --- | --- | --- | --- | --- | --- | --- |
| #8005D | C2 | 21 | 36.04 | 1.78 | 33.2 | 40.4 | C2 vs A1 **< 0.001**  A1 vs A2 **< 0.001**  A2 vs A3 **0.001** | #8005DC2 vs #9006DC2 **0.025**  #8005DA1 vs #9006DA1 **< 0.001**  #8005DA2 vs #9006DA2 **< 0.001**  #8005DA3 vs #9006DA3 **< 0.001**  #8005VC2 vs #9006VC2  **< 0.001**  #8005VA1 vs #9006VA1 **< 0.001**  #8005VA2 vs #9006VA2  **< 0.001**  #8005VA3 vs #9006VA3  **< 0.001** |
| A1 | 10 | 28.36 | 2.33 | 25 | 32.1 |
| A2 | 15 | 18.77 | 1.10 | 17 | 21.1 |
| A3 | 13 | 21.8 | 2.53 | 18.2 | 26.2 |
|  |  |  |  |  |  |  |  |
| #8005V | C2 | 11 | 17.07 | 1.42 | 13.6 | 18.9 | C2 vs A1 **< 0.001**  A1 vs A2 **0.007**  A2 vs A3 **< 0.001** |
| A1 | 13 | 20.88 | 2.22 | 17.1 | 24.3 |
| A2 | 12 | 18.74 | 0.84 | 18 | 20.9 |
| A3 | 14 | 26.83 | 2.83 | 23 | 33.1 |
|  |  |  |  |  |  |  |  |
| #9006D | C2 | 12 | 32.54 | 4.39 | 26.2 | 40 | C2 vs A1 0.178  A1 vs A2 **0.012**  A2 vs A3 **0.005** |
| A1 | 13 | 34.63 | 2.33 | 29 | 37.2 |
| A2 | 11 | 32.02 | 2.12 | 27.5 | 36.1 |
| A3 | 19 | 28.75 | 3.51 | 23 | 34.4 |
|  |  |  |  |  |  |  |  |
| #9006V | C2 | 13 | 29.98 | 2.04 | 24.3 | 33 | C2 vs A1 **< 0.001**  A1 vs A2 **< 0.001**  A2 vs A3 0.516 |
| A1 | 12 | 38.66 | 2.41 | 35.5 | 42.6 |
| A2 | 14 | 32.51 | 4.08 | 25.3 | 40.3 |
| A3 | 24 | 33.70 | 5.82 | 22 | 44.3 |


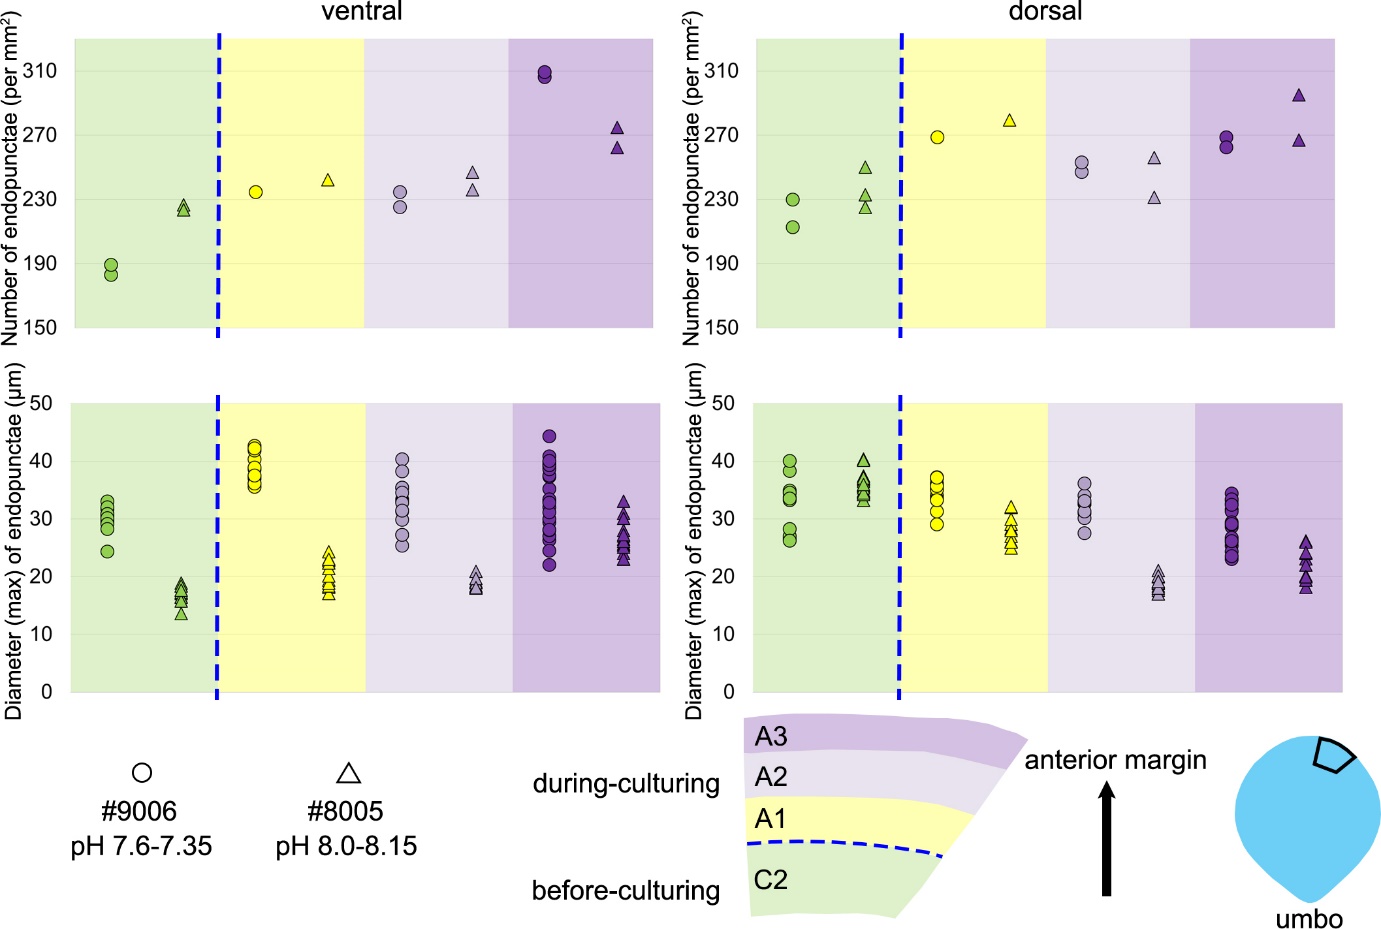


Figure 7. Variations in the number and diameter (max) of endopunctae in the ventral and dorsal valve from a specimen of *M. venosa* cultured at pH 7.35 and 7.6 (#9006) and a specimen cultured at pH 8.0–8.15 (#8005).

3.3 Shell morphometrics

3.3.1 Before-culturing

Ontogenetic variation in fibre morphometry is not obvious when all six adult specimens are considered (Table 8). However, clearer growth trends can be observed when considering the data from each single specimen separately, where *t*-tests on morphometric data from specimens #8005 and #9006 show that there are significant differences in Feret diameter (max) and Roundness between the posterior and the middle part of the shell (Table 9). Overall, in specimens #8005 and #9006 fibres become wider from the posterior to mid–shell. In contrast, #63 shows an opposite trend along the posterior to mid-shell direction (Figure 8). The fibre size and shape in the other specimens are rather constant.

Table 8. Statistical comparisonof fibres size and shape data of the posterior external vs central middle parts of both the ventral valve and the dorsal valve. NC: non-cultured samples #158, #223; CU: cultured samples #43, #63, #8005, #9006; Vpe: ventral posterior external, Vcm: ventral central middle, Dpe: dorsal posterior external, Dcm: dorsal central middle, N: number of measurement. Significant values (*p*–value ≤ 0.05) are marked in bold style.

| Sample | Position | N | Mean | STD | Min | Max | *p*-values |
| --- | --- | --- | --- | --- | --- | --- | --- |
| Feret diameter (max) (μm): | | | | | | | |
| NC | Vpe | 7 | 13.79 | 3.22 | 6.97 | 17.33 | NC Vpe vs CU Vpe 0.486  NC Vcm vs CU Vcm 0.633  NC Vpe vs NC Vcm 0.533  CU Vpe vs CU Vcm 0.572 |
| CU | Vpe | 26 | 12.47 | 6.58 | 4.59 | 24.78 |
| NC | Vcm | 32 | 12.98 | 2.91 | 7.09 | 20.61 |
| CU | Vcm | 65 | 13.24 | 2.15 | 8.68 | 18.84 |
| NC | Dpe | 8 | 18.36 | 4.22 | 13.30 | 24.46 | NC Vpe vs CU Vpe 0.486  NC Vcm vs CU Vcm 0.633  NC Vpe vs NC Vcm 0.533  CU Vpe vs CU Vcm 0.572 |
| CU | Dpe | 12 | 10.78 | 6.36 | 4.85 | 22.29 |
| NC | Dcm | 12 | 12.14 | 1.13 | 9.84 | 14.42 |
| CU | Dcm | 46 | 12.51 | 1.57 | 9.45 | 15.89 |
| Roundness: | | | | | | | |
| NC | Vpe | 7 | 0.308 | 0.077 | 0.239 | 0.475 | NC Vpe vs CU Vpe 0.717  NC Vcm vs CU Vcm 0.396  NC Vpe vs NC Vcm 0.296  CU Vpe vs CU Vcm 0.146 |
| CU | Vpe | 26 | 0.296 | 0.074 | 0.172 | 0.446 |
| NC | Vcm | 29 | 0.282 | 0.051 | 0.179 | 0.389 |
| CU | Vcm | 65 | 0.272 | 0.051 | 0.180 | 0.421 |
| NC | Dpe | 8 | 0.220 | 0.034 | 0.169 | 0.268 | NC Dpe vs CU Dpe **0.003**  NC Dcm vs CU Dcm **0.028**  NC Dpe vs NC Dcm **0.005**  CU Dpe vs CU Dcm **0.048** |
| CU | Dpe | 12 | 0.337 | 0.100 | 0.155 | 0.500 |
| NC | Dcm | 11 | 0.311 | 0.068 | 0.192 | 0.416 |
| CU | Dcm | 48 | 0.269 | 0.051 | 0.162 | 0.378 |
| Convexity: | | | | | | | |
| NC | Vpe | 7 | 0.985 | 0.004 | 0.979 | 0.991 | NC Vpe vs CU Vpe 0.309  NC Vcm vs CU Vcm 0.655  NC Vpe vs NC Vcm 0.823  CU Vpe vs CU Vcm 0.257 |
| CU | Vpe | 26 | 0.982 | 0.008 | 0.968 | 0.999 |
| NC | Vcm | 32 | 0.984 | 0.005 | 0.975 | 1.000 |
| CU | Vcm | 62 | 0.984 | 0.008 | 0.965 | 1.008 |
| NC | Dpe | 8 | 0.987 | 0.006 | 0.979 | 0.998 | NC Dpe vs CU Dpe 0.604  NC Dcm vs CU Dcm 0.273  NC Dpe vs NC Dcm 0.543  CU Dpe vs CU Dcm 0.207 |
| CU | Dpe | 11 | 0.985 | 0.007 | 0.973 | 0.998 |
| NC | Dcm | 12 | 0.984 | 0.008 | 0.973 | 1.000 |
| CU | Dcm | 48 | 0.982 | 0.008 | 0.967 | 1.001 |

Table 9. Statistical comparisonof fibres size and shape data of the posterior external vs central middle area for #8005 and #9006, considering both valves together. pe: posterior external, cm: central middle, N: number of measurement. Significant values (*p*–value ≤ 0.05) are marked in bold style.

| Sample | Position | N | Mean | STD | Min | Max | *p*-values |
| --- | --- | --- | --- | --- | --- | --- | --- |
| Feret diameter (max) (μm): | | | | | | | |
| #8005 | pe | 10 | 7.92 | 3.30 | 4.85 | 14.97 | #8005 pe vs #9006 pe 0.265  #8005 cm vs #9006 cm 0.171  #8005 pe vs #8005 cm **0.003**  #9006 pe vs #9006 cm  **< 0.001** |
| #8005 | cm | 36 | 12.29 | 1.64 | 9.63 | 15.89 |
| #9006 | pe | 10 | 6.45 | 1.95 | 4.59 | 11.41 |
| #9006 | cm | 25 | 11.73 | 1.39 | 8.68 | 15.24 |
| Roundness: | | | | | | | |
| #8005 | pe | 10 | 0.33 | 0.097 | 0.155 | 0.446 | #8005 pe vs #9006 pe 0.547  #8005 cm vs #9006 cm **0.012**  #8005 pe vs #8005 cm **0.040**  #9006 pe vs #9006 cm **0.022** |
| #8005 | cm | 36 | 0.25 | 0.045 | 0.162 | 0.374 |
| #9006 | pe | 10 | 0.35 | 0.079 | 0.232 | 0.500 |
| #9006 | cm | 26 | 0.28 | 0.043 | 0.195 | 0.369 |
| Convexity: | | | | | | | |
| #8005 | pe | 10 | 0.981 | 0.007 | 0.973 | 0.994 | #8005 pe vs #9006 pe 0.308  #8005 cm vs #9006 cm 0.277  #8005 pe vs #8005 cm 0.829  #9006 pe vs #9006 cm 0.775 |
| #8005 | cm | 35 | 0.982 | 0.008 | 0.968 | 1.001 |
| #9006 | pe | 9 | 0.985 | 0.007 | 0.975 | 0.999 |
| #9006 | cm | 26 | 0.984 | 0.007 | 0.967 | 1.001 |


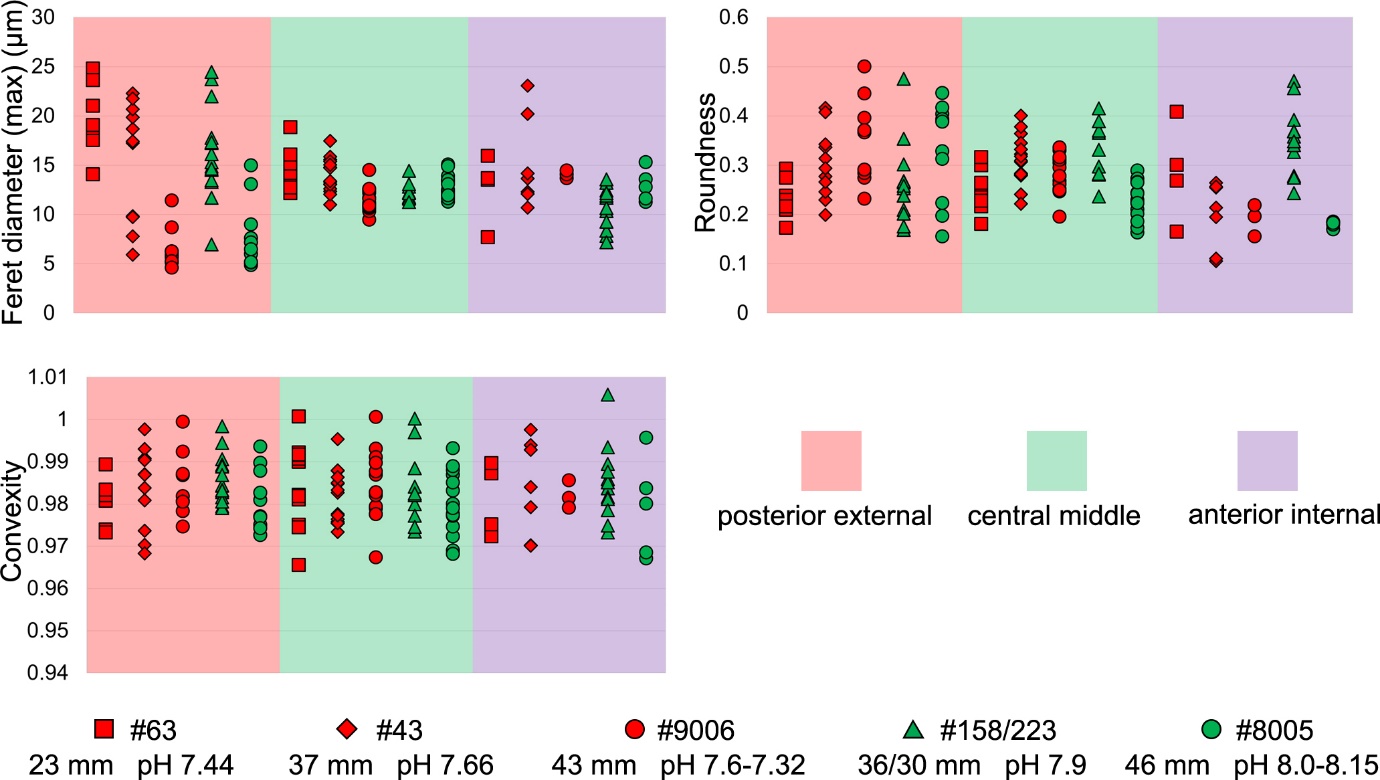


Figure 8. Comparisons of the fibre size and shape of *M. venosa* (ventral and dorsal valve) at different positions along the posterior-anterior axis; pH conditions of culturing or natural environment are reported. One circle point represents one measurement. Outliers have been removed, the latter were identified with Tukey's fences (Tukey, 1977), when falling outside the fences F1 and F2 [F1 = Q1 - 1.5IQR; F2 = Q3 + 1.5IQR; Q1/Q3 = first/third quartiles; IQR (interquartile range) = Q3 - Q1].

3.3.2 During-culturing

Transverse sections obtained by smoothing of the anterior part of the shell allowed to measure the width of 1392 fibres [Max Ferret diameter (max) see in Method 1], and select 388 sub–zones for fibre boundary calculation. In addition, they allowed us to focus on the parts that were produced under the different low–pH treatments (pH1, pH2, pH3 and pH4, respectively).

In all six specimens, the width of fibres increases and the number of boundaries decreases along a transect from the more external subzone to the immediately inner subzone (e.g., Z1–1 to Z1–2; Z2–1 to Z2–2; and Z3–1 to Z3–2 in Figure 9A, B, C, D). That means, even within less than 10 μm distance, the size of fibres become larger from the exterior to the interior part of the shell with growth.

Results from #9006 were compared to those of control specimen #8005 (pH0). Specimen #9006 cultured under low–pH conditions (pH1 and pH2) had narrower fibres and a higher number of fibre boundaries when compared to that of control specimen #8005 (Figure 9A, C). It is worth noting that, in comparison between the two specimens, the fibres from Z1–2 and Z2–2 of #9006 are significantly smaller than those of #8005. However, there is no significant difference in the size of fibres from subzone Z3–2 between the two specimens (Table 10).

The results from specimens (#43 and #63) grown under low pH conditions (pH3 andpH4)for a short time interval of 214 days are difficult to interpret, as in this case, there is no direct control experiment sample to compare with the cultured specimens (Figure 9B, D). The specimens grown in the natural environment (#158, #223) have a different size and age and so different growth rates may affect the size of the fibres.

Table 10. Statistical comparisonof fibres size of *M. venosa* (ventral and dorsal valve) in the anterior transverse sections. ①: specific zones see Figure 9. N: number of measurement. Significant values (*p*–value ≤ 0.05) are marked in bold style.

| Sample | position① | N | Mean (μm) | STD | Min (μm) | Max (μm) | Difference between means (μm) and (*p*–values) | Difference between means (μm) and (*p*–values) | Difference between means (μm) and (*p*–values) |
| --- | --- | --- | --- | --- | --- | --- | --- | --- | --- |
|  |  |  |  |  |  |  | #9006 vs #8005 for the same zone | Z1 vs Z2, Z2 vs Z3 for the same vertical position in the same specimen | Z1vs Z2, Z2 vs Z3 for the same transverse position in the same specimen |
| #9006 | Z1–1 | 26 | 4.43 | 1.06 | 2.86 | 6.74 | 0.23 (0.402) | #9006 Z1–1 vs Z2–1  **0.60 (0.013)**  #9006 Z2–1 vs Z3–1  0.07 (0.650)  #8005 Z1–1 vs Z2–1  **0.71 (0.001)**  #8005 Z2–1 vs Z3–1  0.13 (0.554) | #9006 Z1 vs Z2  **0.48 (0.011)**  #9006 Z2 vs Z3  0.14 (0.323)  #8005 Z1 vs Z2  **0.59 (< 0.001)**  #8005 Z2 vs Z3  0.09 (0.595) |
| #8005 | Z1–1 | 49 | 4.66 | 1.13 | 1.89 | 7.37 |
|  |  |  |  |  |  |  |  |
| #9006 | Z2–1 | 53 | 3.83 | 0.66 | 2.76 | 5.30 | 0.12 (0.419) |
| #8005 | Z2–1 | 65 | 3.95 | 1.03 | 2.06 | 6.46 |
|  |  |  |  |  |  |  |  |
| #9006 | Z3–1 | 38 | 3.76 | 0.80 | 2.32 | 5.55 | 0.32 (0.134) |
| #8005 | Z3–1 | 44 | 4.08 | 1.05 | 2.22 | 7.53 |
|  |  |  |  |  |  |  |  |
| #9006 | Z1–2 | 26 | 4.71 | 1.27 | 2.76 | 8.38 | **0.74 (0.024)** | #9006 Z1–2 vs Z2–2  0.33 (0.200)  #9006 Z2–2 vs Z3–2  0.30 (0.144)  #8005 Z1–2 vs Z2–2  **0.45 (0.048)**  #8005 Z2–2 vs Z3–2  0.08 (0.720) |
| #8005 | Z1–2 | 46 | 5.45 | 1.29 | 2.94 | 10.43 |
|  |  |  |  |  |  |  |  |
| #9006 | Z2–2 | 48 | 4.38 | 0.90 | 2.87 | 7.00 | **0.62 (0.001)** |
| #8005 | Z2–2 | 59 | 5.00 | 0.97 | 2.94 | 7.16 |
|  |  |  |  |  |  |  |  |
| #9006 | Z3–2 | 40 | 4.68 | 1.01 | 2.57 | 7.76 | 0.40 (0.087) |
| #8005 | Z3–2 | 38 | 5.08 | 1.00 | 3.02 | 7.78 |
|  |  |  |  |  |  |  |  |
| #9006 | Z4–1 | 23 | 3.79 | 0.71 | 2.72 | 4.99 | **0.72 (0.003)** | #9006 Z4–1 vs Z5–1  0.11 (0.594) | #9006 Z4 vs Z5  0.09 (0.615) |
| #8005 | Z4–1 | 58 | 4.51 | 1.02 | 2.15 | 7.11 |
|  |  |  |  |  |  |  |  |
| #9006 | Z5–1 | 24 | 3.68 | 0.72 | 2.54 | 5.19 | NA |
|  |  |  |  |  |  |  |  |
| #9006 | Z4–2 | 33 | 4.61 | 0.89 | 3.15 | 6.55 | 0.24 (0.272) | #9006 Z4–2 vs Z5–2  0.06 (0.811) |
| #8005 | Z4–2 | 52 | 4.85 | 1.01 | 3.07 | 6.90 |
|  |  |  |  |  |  |  |  |
| #9006 | Z5–2 | 24 | 4.67 | 1.08 | 2.79 | 7.48 | NA |
|  |  |  |  |  |  |  |  |
|  |  |  |  |  |  |  | #63 vs #43 vs #158/223 for the same zone | Z1 vs Z2 for the same vertical position in the same specimen | Z1 vs Z2 for the same transverse position in the same specimen |
| #63 | Z1–1 | 36 | 3.37 | 0.59 | 2.39 | 4.97 | #63 vs #158/223  **0.40 (0.013)**  #43 vs #158/223  **0.76 (< 0.001)** | #63 Z1–1 vs Z2–1  **0.72 (< 0.001)**  #43 Z1–1 vs Z2–1  0.26 (0.109)  #158/223 Z1–1 vs Z2–1 0.95 **(< 0.001)** | #63 Z1 vs Z2  **0.80 (< 0.001)**  #43 Z1 vs Z2  **0.40 (0.001)**  #158/223 Z1 vs Z2  **1.2** **(< 0.001)** |
| #43 | Z1–1 | 70 | 3.73 | 0.98 | 1.63 | 6.94 |
| #158/223 | Z1–1 | 29 | 2.97 | 0.66 | 2.03 | 4.52 |
|  |  |  |  |  |  |  |
| #63 | Z2–1 | 24 | 4.09 | 0.75 | 2.84 | 5.85 | #63 vs #158/223  0.17 (0.404)  #43 vs #158/223  0.07 (0.691) |
| #43 | Z2–1 | 61 | 3.99 | 0.82 | 1.95 | 5.88 |
| #158/223 | Z2–1 | 56 | 3.92 | 0.83 | 2.17 | 6.14 |
|  |  |  |  |  |  |  |
| #63 | Z1–2 | 35 | 4.02 | 0.87 | 2.56 | 6.19 | #63 vs #158/223  **0.73 (0.001)**  #43 vs #158/223  **0.75 (< 0.001)** | #63 Z1–2 vs Z2–2  **0.95 (< 0.001)**  #43 Z1–2 vs Z2–2  **0.58 (0.001)**  #158/223 Z1–2 vs Z2–2  **1.4 (< 0.001)** |
| #43 | Z1–2 | 71 | 4.04 | 0.87 | 2.16 | 7.24 |
| #158/223 | Z1–2 | 25 | 3.29 | 0.67 | 2.04 | 4.73 |
|  |  |  |  |  |  |  |
| #63 | Z2–2 | 20 | 4.97 | 0.95 | 3.64 | 7.19 | #63 vs #158/223  0.28 (0.234)  #43 vs #158/223  0.07 (0.688) |
| #43 | Z2–2 | 56 | 4.62 | 1.10 | 2.68 | 7.67 |
| #158/223 | Z2–2 | 55 | 4.69 | 0.85 | 3.02 | 7.09 |


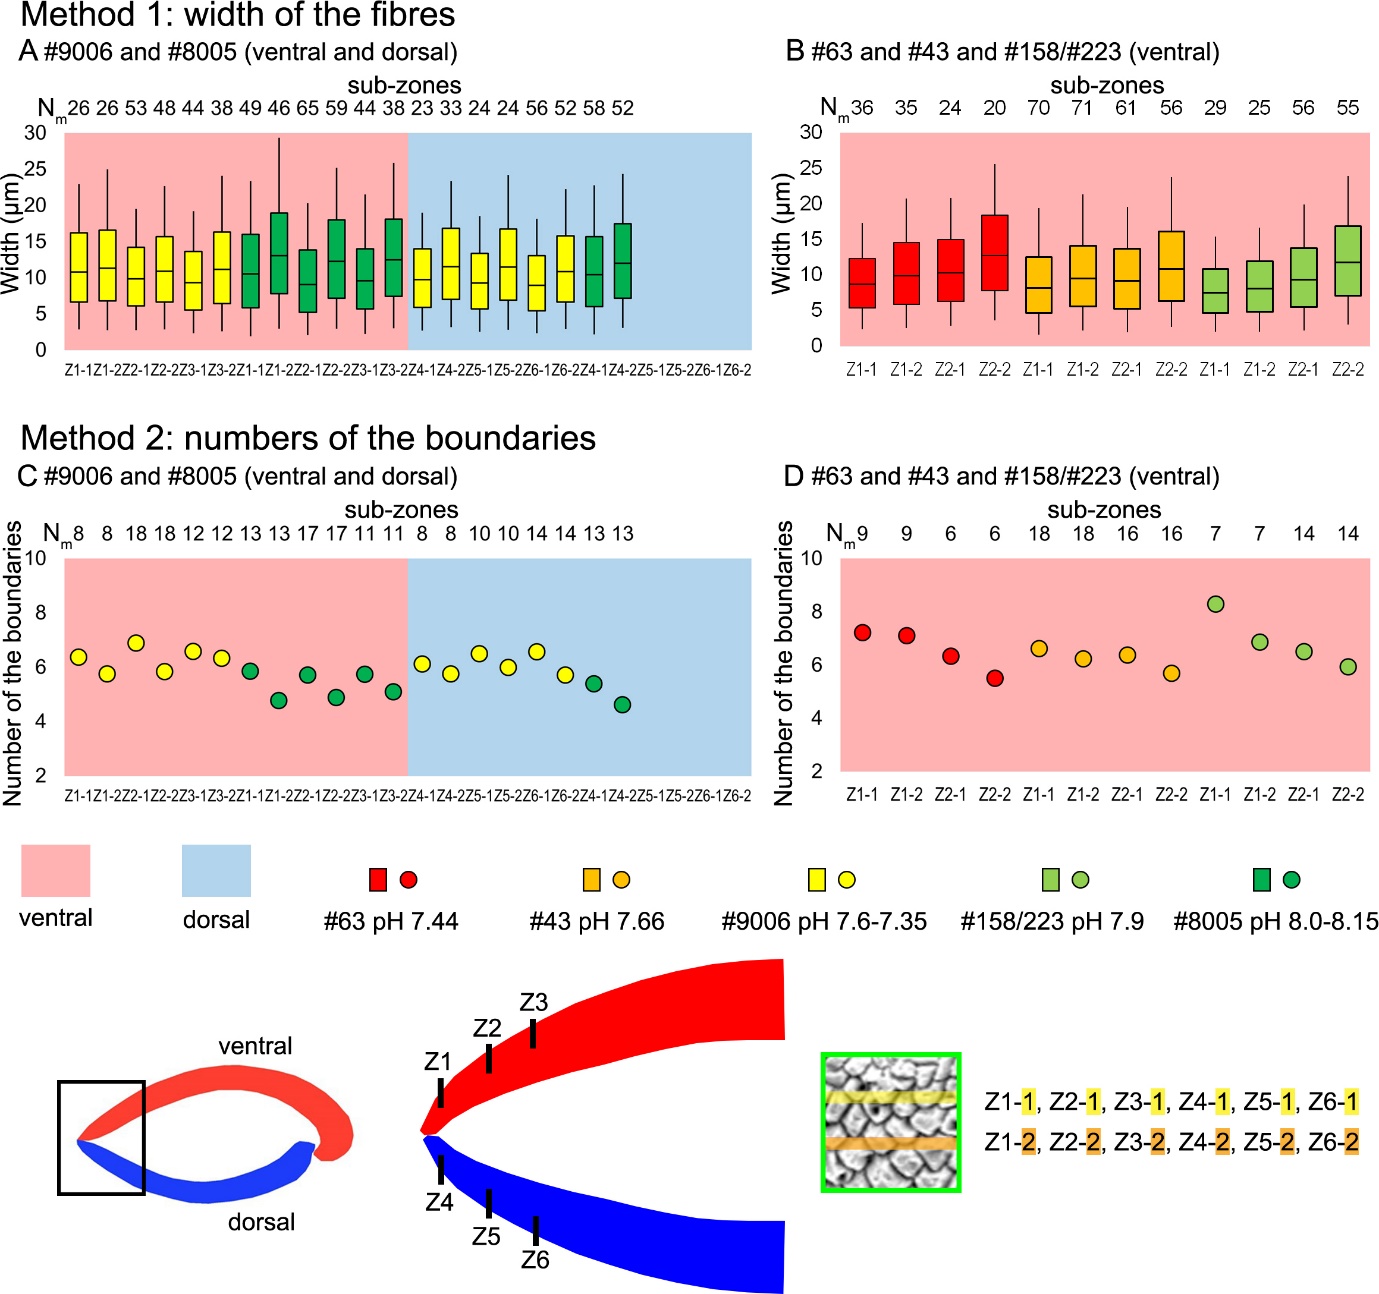


Figure 9. Differences in sizes of fibres of *M. venosa* (ventral and dorsal valve) in the anterior transverse sections of specimens cultured at different pH conditions. A, B: The bottom/top of the box and the band inside the box are the first/third quartiles and the median of the data respectively; ends of the whiskers represent the minimum and maximum of results. C, D: Circle point represents average data, Nm: number of measurement.

3.4 Stable isotopes

The δ13C and δ18O data were measured along the shell growth increments in the dorsal and ventral valves (Figure 10). In the *before-culturing* part, δ13C values varied between -2.02 ‰ and +0.45 ‰ in the control group specimens #8004 and #8005, whereas they varied between -9.24 ‰ and -0.53 ‰ in the low pH group specimens #9004, #9005 and #9006. δ18O values varied between -2.39 ‰ and +0.21 ‰ in the control group specimens #8004 and #8005, but varied between -4.92 ‰ and +0.05 ‰ in the low pH group specimens #9004, #9005 and #9006.

In the *during*–*culturing* part, δ13C values varied between -6.80 ‰ and -1.34 ‰ in the control group specimens #8004 and #8005, whereas they varied between -27.09 ‰ and -9.69 ‰ in the low pH group specimens #9004, #9005 and #9006 (Figure 10). δ18O values varied between -6.80 ‰ and -1.34 ‰ in the control group specimens #8004 and #8005, but varied between -6.97 ‰ and -5.29 ‰ in the low pH group specimens #9004, #9005 and #9006 (Figure 10).

A marked drop in δ13C and δ18O is recorded in the shell increments produced *during*–*culturing*, particularly so in the specimens grown under low pH conditions (pH1 and pH2), where δ13C values decreased to -27.09 ‰ (Figure 10).


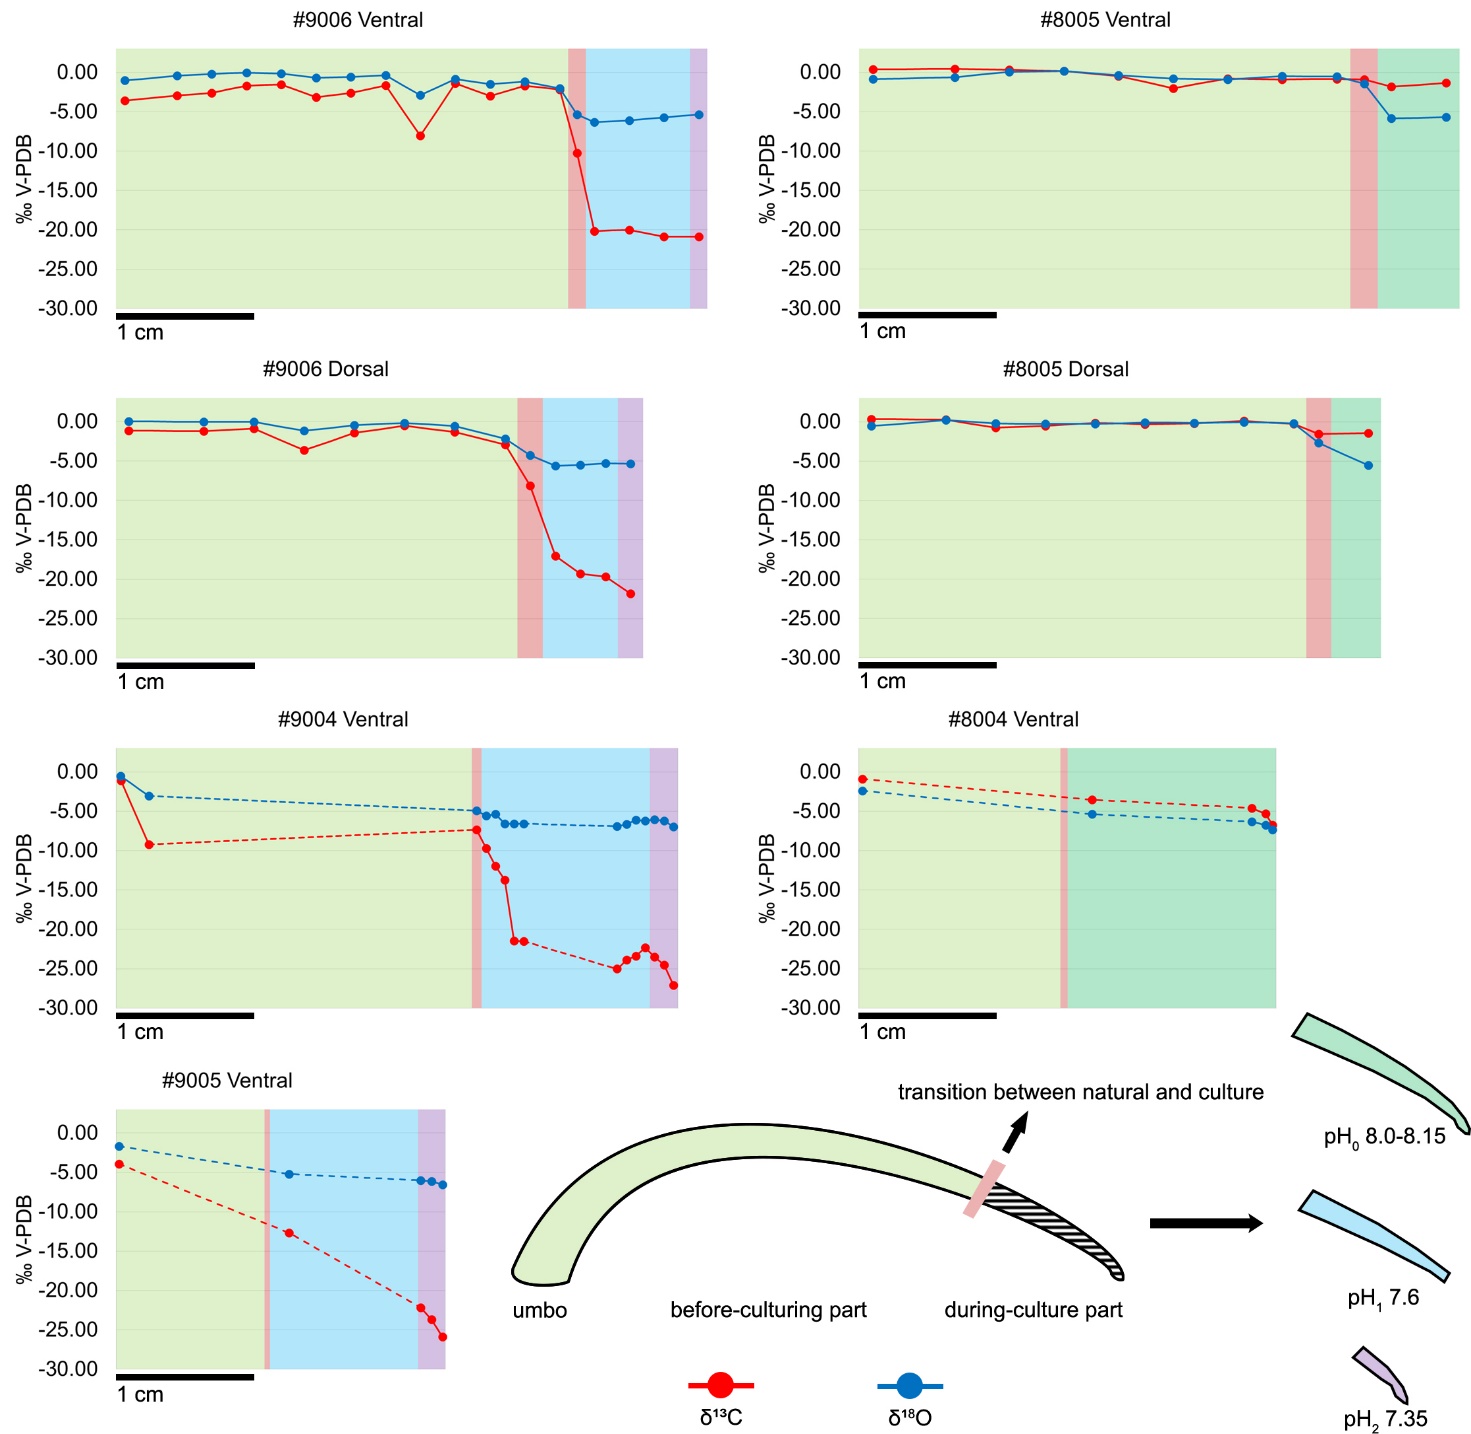


Figure 10. Plots of δ13C and δ18O of the ventral and dorsal valves of *M. venosa* specimens along their growth axis. Different colour backgrounds represent different pH conditions during growth. When few data were available, data-points were joined by dashed lines.

**4 Discussion**

4.1 Microstructure and organic components relationship

Before discussing whether and how acidification may affect the microstructure of the brachiopod shell, it is important to examine the relationship between the microstructure and the amount of organic components within the shell. It has already been stated that, in fossil and recent brachiopods, different shell microstructures have different amounts of shell organic components (Garbelli et al., 2014, 2017; Ye et al., 2018a; Casella et al., 2018).

This holds true for most rhynchonelliformean brachiopods, the primary layer of *M. venosa* consists of finely acicular and granular calcite (Williams, 1968, 1973, 1997; MacKinnon and Williams, 1974; Williams and Cusack, 2007; Casella et al., 2018). Analyses of electron back scattering diffraction show that the primary layer is produced in a thin nanocrystalline film with higher micro–hardness and smaller–sized calcite crystallites compared to those of the secondary layer (Griesshaber et al., 2004). In addition, each spherical and small unit is coated by a mixture of organics and amorphous calcium carbonate (Cusack et al., 2010). This, *per se*, may suggest a higher amount of organic components than other shell layers, but it has never been proven. In fossils, the primary layer is likely to be diagenetically altered and luminescent (Grossman et al., 1991), suggesting that higher amounts of organic components may be present. However, this has been also ascribed to the incorporation of magnesium into the lattice (Popov, et al., 2007; Cusack et al. 2008). A report of higher sulphur concentration in the primary layer of the brachiopod *Terebratulina retusa* may suggest the presence of a sulphur-rich organic components, but backscatter electron imaging revealed contradictory results (England et al., 2007). Cusack et al. (2008) showed that, in the same species, the sulphate concentration is higher in the primary layer than in the secondary layer. Depleted δ18O and δ13C values in the primary layer caused by kinetic effects have been reported by Carpenter and Lohmann (1995), Auclair et al. (2003), and Parkinson et al. (2005). May this indicate a greater amount of organic components in this part of the shell? Since there is no conclusive evidence for this observation, we cannot relate the increase in thickness of the primary layer to changes in organic components within the shell. With respect to previous findings (Williams, 1966; Parkinson et al., 2005), our results show that the thickness of the primary layer of *M. venosa* is much less uniform and shows an increase with growth, which is more evident during culturing at low pH conditions. However, disturbances (stress condition with handling before and at the start of the culturing) may cause an abrupt change in thickness.

Endopunctae, which in life are filled with mantle expansion, are widely distributed in the shell of *M. venosa* and show the superficial hexagonal close-packing pattern documented by Cowen (1966). The biological function of endopunctae is still controversially discussed, with some suggesting that generally, in living organism they serve as support and protection structures (Williams, 1956, 1997), as sensors, or as storage and respiration features (Pérez–Huerta et al., 2009). With more endopunctae filled by mantle expansions, the amount of organic components would increase in the same volume of shell. The density of endopunctae has been related to temperature, as species living at higher temperatures have greater endopunctae density (Campbell, 1965; Foster, 1974; Peck et al., 1987; Ackerly et al., 1993). The present analyses suggest that the increase in endopunctae density may be related in part to ontogeny; it is higher in the specimen cultured at low pH condition. This may be expected, as specimens living under low pH conditions have to up-regulate their internal pH to be able to calcify as shown for instance in corals by McCulloch et al. (2012) and Movilla et al. (2014). This would demand a higher energetic cost and thus a larger respiration/storage surface would be favourable to cope with it.

The punctal pattern detected here is different from that observed by Cross et al. (2018), who recorded no change in the punctal density of the ventral valve of *C. inconspicua* on specimens from the last 120 years. Also different is the trend in size of the endopunctae, which measured in the dorsal valve only by Cross et al. (2018), seems to decrease in size. However, the environmental conditions of the natural ambient of 0.1 pH unit decrease and 2°C increase over the last two decades (refs. in Cross et al., 2018) are very different from those of our culturing experiments. Further, the size of the endopunctae was measured from the dorsal valve only by Cross et al. (2018), whereas the increase in size we report was observed only from the ventral valve of *M. venosa*.

In addition to the thickness of the primary layer and the density of the endopunctae, the size changes of the individual fibres within the fibrous secondary layer may also contribute to the variability in organic components. Most of the recent rhynchonelliformean brachiopods, and *M. venosa* in particular, possess a shell mainly made by a fibrous secondary layer (Williams, 1997; Parkinson et al. 2005; Williams and Cusack, 2007). Each fibre of this layer is secreted by the mantle and it is ensheathed by organic membrane (e.g., Jope, 1965; Williams, 1968; MacKinnon, 1974; Williams and Cusack, 2007; Cusack et al., 2008; Casella et al., 2018; Romanin et al., 2018). Thus, with a decrease in size but within the same shell volume the surface area increases and with it the amount of organic components. Recently, the relationship between the size of fibres and the shell organic components was discussed in detail (Garbelli, 2017; Garbelli et al. 2017; Ye et al., 2018a). The main conclusion is that the smaller the calcite fibres, the higher the organic components in the shell (cf. Figure 11). Thus, smaller fibres, and a greater endopunctae density may lead to higher organic components content per shell volume (Figure 11).


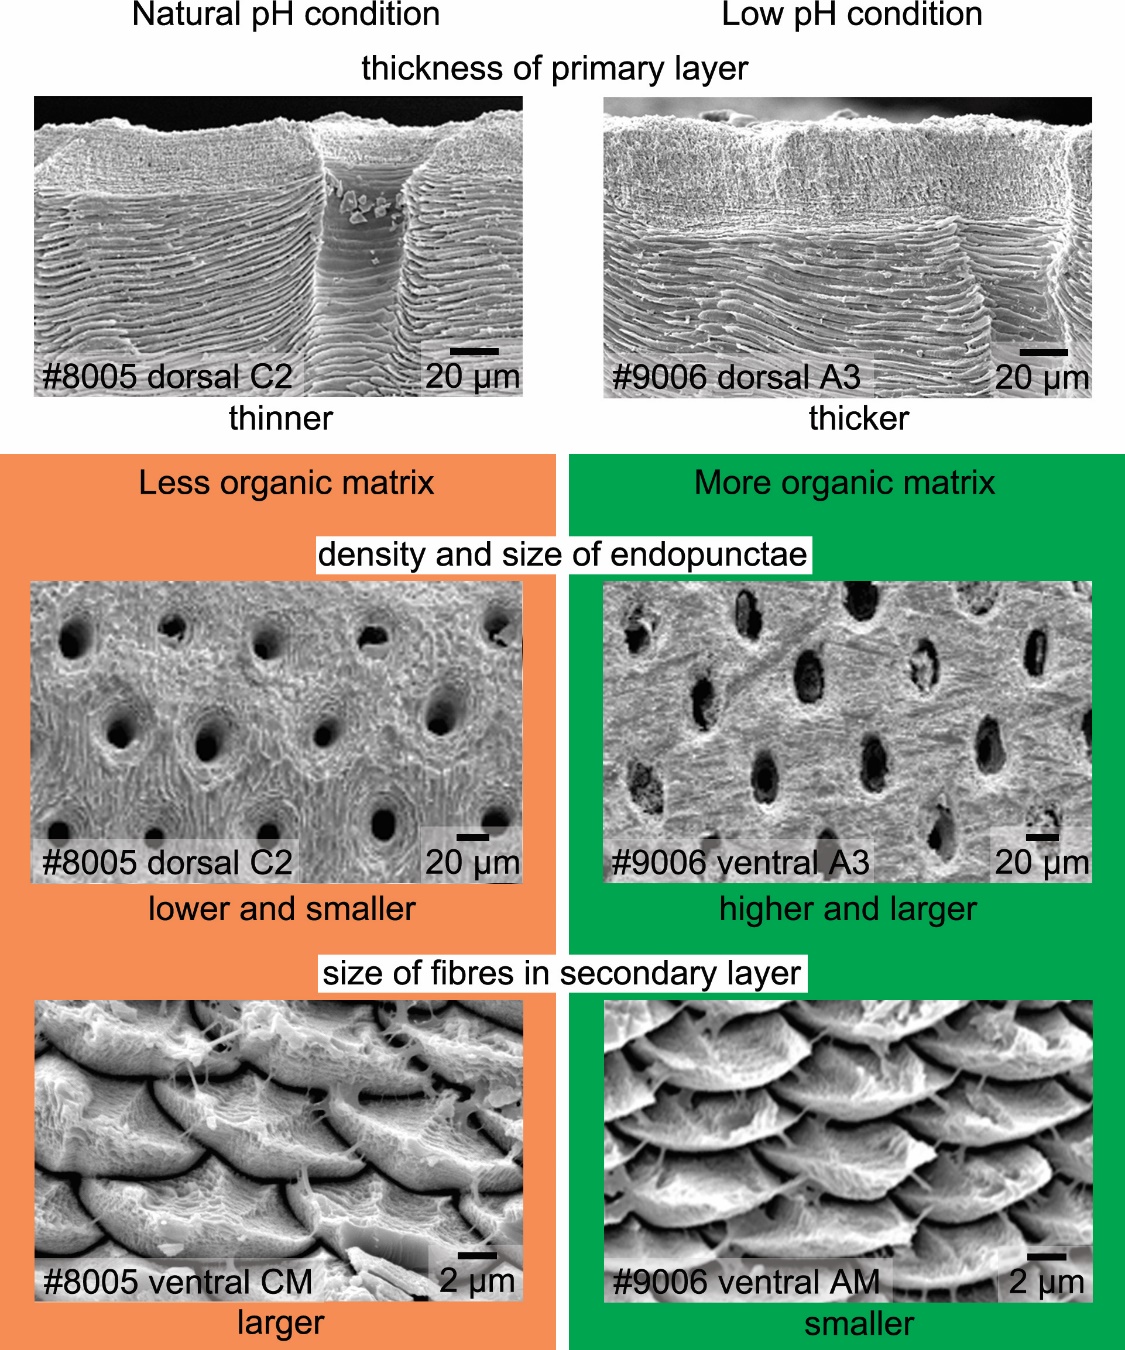


Figure 11. Relationship between the microstructure and the organic components of calcified shells of brachiopods. Position information see Figure 6 and Figure 7; CM: central middle part; AM: anterior middle part.

4.2 Low pH and brachiopod microstructure

Several studies tried to understand how marine carbonate shelled animals respond to ocean acidification, such as brachiopods (McClintock et al., 2009; Cross et al., 2015, 2016, 2018), bivalves (e.g., Berge et al., 2006; McClintock et al., 2009; Beniash et al., 2010; Parker et al., 2010; Melzner et al., 2011; Talmage and Gobler, 2011; Amaral et al., 2012; Hiebenthal et al., 2013; Coleman et al., 2014; Gobler et al., 2014; Milano et al., 2016), cold-water scleractinian corals (e.g., McCulloch et al., 2012; Form and Riebesell, 2012; Jantzen et al., 2013b; Büscher et al., 2017) and sea urchins (Suckling et al., 2015) (Supplementary Table 1). The results of these studies show that, in general, seawater acidification reduces the growth rates of marine calcifiers (Michaelidis et al., 2005; Shirayama and Thornton, 2005; Berge et al., 2006; Bibby et al., 2007; Beniash et al., 2010; Nienhuis et al., 2010; Thomsen and Melzner, 2010; Fernández-Reiriz et al., 2011; Melzner et al., 2011; Mingliang et al., 2011; Talmage and Gobler, 2011; Parker et al., 2011, 2012; Liu and He, 2012; Navarro et al., 2013; Milano et al., 2016).

For the Antarctic brachiopod *Liothyrella uva* and the New Zealand brachiopod *Calloria inconspicua* no ocean acidification effects on shell growth were detected by Cross et al. (2015, 2016, 2018), although, shells of the former species may rapidly dissolve in acidified waters (McClintock et al., 2009). One response, however, appears to reinforce the shells of *C. inconspicua* by laying down a denser shell compared to specimens from New Zealand over the last 120 years while subjected to a slight decrease in pH (by 0.1) and 2°C increase in temperature over the last two decades (Cross et al., 2018).

The present experiment showed that growth of specimen was not affected by the low pH conditions, instead their growth was similar of that of the specimen cultured under control conditions (#9006, ~0.9 cm in the ventral valve, ~0.8 cm in the dorsal valve; 8005, ~0.5 cm in the ventral valve, ~0.4 cm in the dorsal valve). Based on the growth von Bertalanffy growth function calculated by Baumgarten et al. (2013), the expected growth increment was calculated and compared with the measured one. Figure 12 demonstrates that the measured individual growth rates are within the range of the ones of naturally growing individuals (Fig. 12).


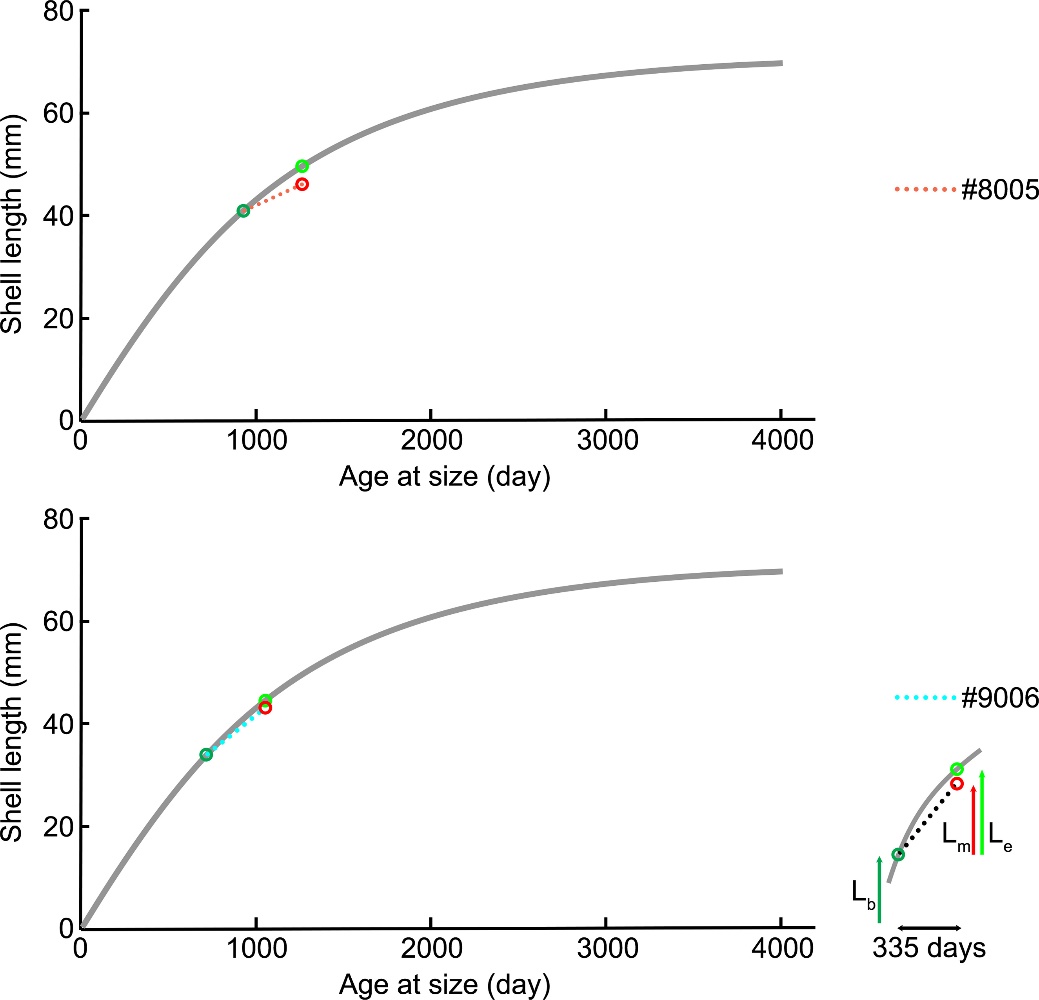


Figure 12. Projection of shell length of ventral valve on the von Bertalanffy growth function (grey line) L*t* = 71.53 [1 - e-0.336(*t*-*t*0)], source from Baumgarten et al. (2013), Lb: shell length at the beginning of culturing; Lm: measured shell growth at the end of culturing; Le: expected shell growth.

A limiting factor of this assessment is the limited database, but the present observations agree with studies that show no or little impact of acidification on brachiopod growth rates (Marchant et al., 2010; Thomsen et al., 2010; Talmage and Gobler, 2011; Range et al., 2011, 2012; Dickinson et al., 2012; Fernández-Reiriz et al., 2012; Liu and He, 2012; Hiebenthal et al., 2013; Cross et al., 2015, 2016, 2018) or, even an increase in respiration, shell growth or metabolic rates after having experienced low pH condition (Wood et al., 2008; Cummings et al., 2011; Parker et al., 2012).

Therefore, the observations of marine calcifiers to seawater acidification in terms of growth rates are complex. The response of marine organisms to the interplay of several stressors such as low pH, lower dissolved oxygen and higher temperature is even more complex. Steckbauer et al. (2015) reported that hypoxia and increased *p*CO2 could significantly reduce the respiration rate of marine invertebrates (Anthozoa, Gastropoda, Echinoidea and Crustacea). Highest growth rate in the bivalve *Macoma balthica* [= *Limecola balthica* (Linnaeus, 1758)] was observed in a combination of low O2 and high pH conditions (Jansson et al., 2015). Gobler et al. (2014) reported that juveniles of the bivalves *Argopecten irradians* (Lamarck, 1819) and *Mercenaria mercenaria* (Linnaeus, 1758) are not affected when hypoxia or acidification if applied separately, but the growth rate decreases when juveniles are exposed to both conditions simultaneously.

To explore the effects of acidification on brachiopod biomineralization, the microstructures of the specimens cultured for 214 days (#43 and #63) at pH3 and pH4 and the other population cultured for 335 days (#8005 and #9006) at pH0 and pH1 to pH2 were investigated in detail. No conclusive consideration can be carried out on the specimens cultured for 214 days, but when the culturing experiment is conducted for a time interval of 335 days, the microstructure produced by the specimen cultured at low pH conditions (pH1 to pH2) is different from that produced under control condition (pH0): 1) the thickness of the primary layer increases with culturing; 2) the density and size of the endopunctae are higher; and 3) the fibres of the secondary layer are smaller. Thus, the length of culturing time–in terms of months–under low pH conditions seems to be an important control factor.

This is in line with the few data available in the literature on microstructural changes during acidification. Milano et al. (2016) reported no significant difference in the prismatic microstructure of the cockle *Cerastoderma edule* when cultured under low pH conditions for about 2 months, except for dissolution of ontogenetically younger parts of the shell. Similarly, a study by Stemmer et al. (2013) on the clam *Arctica islandica* revealed that there was no effect on the shape and size of the crystals in the homogeneous microstructure after three months of culturing at low pH (Supplementary Table 1). However, the experiments conducted by Fitzer et al. (2014a, b) for six months on the blue mussel *Mytilus edulis* showed that the animals exposed to low pH and high *p*CO2 tend to produce less organised, disorientated calcite crystals and an unordered layer structure.

Thus, in bivalves, similarly to our observations, the duration of culturing may be crucial in recording significant effects. The present results lend support to the microstructure variation observed in brachiopods during the end-Permian extinction event and concomitant ocean acidification (Garbelli et al., 2017). During this event, both Strophomenata and Rhynchonellata produced more organic rich shells to cope with the long term and protracted seawater acidification effects (Garbelli et al., 2017).

4.3 Stable isotope variation at low pH condition

Brachiopod shells are the archives commonly used for deep-time paleoenvironmental reconstructions as they potentially record the original geochemical composition of the seawater they lived in (Grossman et al., 1993; Banner and Kaufman, 1994; Mii and Grossman, 1994; Mii et al., 2001; Brand et al., 2003, 2011, 2016; Jurikova et al., in review). Several studies suggest that oxygen and carbon isotopic compositions of the secondary layer of brachiopod shells–especially its innermost part–tend to be in equilibrium with the seawater chemistry (e.g., Popp et al., 1986; Carpenter and Lohmann, 1995; Parkinson et al., 2005; Brand et al., 2013, 2015, 2016; Takayanagi et al., 2013; Yamamoto et al., 2013).

The measured δ13C and δ18O values of the secondary layer produced during growth in the natural environment (Figure 10) are similar to previous results from the shells of *M. venosa* (Penman et al., 2013; Ullmann et al., 2017; Romanin et al. 2018). Furthermore, the present results show that there are no significant differences in δ13C and δ18O values between the dorsal and ventral valves (*p*–values in δ13C and δ18O of #8005 are 0.437 and 0.491 respectively, *p*-values in δ13C and δ18O of #9006 are 0.862 and 0.910 respectively), which are in agreement with previous findings (e.g., Parkinson et al., 2005; Brand et al., 2015; Romanin et al., 2018).

Generally, in the naturally grown shell *before*–*culturing*, δ13C and δ18O values are relatively stable along the ontogenetic direction, except for depleted values at approximately mid–shell length in both #8005 and #9006. In particular, in #9006, in this part of the shell values drop to about -6 ‰ for δ13C and -2 ‰ for δ18O values (Figure 10). We exclude that this drop may be produced by shell material added later, during the *during*–*culturing* shell thickening, as the samples were taken from the mid-shell layer and not from the shell interior. Also, negative isotope excursions of similar magnitude were recorded in *M. venosa* specimens from the South America shelf by Ullmann et al. (2017) and Romanin et al. (2018). Ullmann et al. (2017) implied that these variable δ13C and δ18O values indicate isotope disequilibrium with ambient waters in Terebratellids. In contrast, Romanin et al. (2018), who also analysed specimens collected from Comau Fjord, attributed the negative isotope excursion to environmental perturbations, in particular, to changes in seawater productivity and temperature, and/or to anthropogenic activities. Negative shifts in both, δ13C and δ18O values during ontogeny have also been observed also in in the brachiopod *Terebratella dorsata*,which co–occurs with *M. venosa* and have been explained by the effect of resorption in corresponding muscle scars (Carpenter and Lohmann, 1995). Here, we follow the interpretation of Romanin et al. (2018) to explain the mid–shell excursion observed in our specimens.

In our experiments, oxygen isotope compositions record only a minor depletion *during*–*culturing* at different pH conditions, a depletion which is in isotope equilibrium with δ18OH2O during the cultivation process [δ18O (VSMOW): -6.88 ‰ for the low pH conditions and -6.69 ‰ for the control conditions].

However, a sharp drop in δ13C values was observed in the secondary layer produced *during*–*culturing* under low pH conditions. δ13C values are depleted by more than 20 ‰ in the specimens cultured at low pH conditions (pH1 and pH2; #9004, #9005 and #9006) (Figure 10 and Appendix), whereas the depletion is lower by just a few per mil (ca. 0.9–1.2 ‰) in the control specimens (pH0;#8004 and #8005). Our results are comparable with those of other studies. Hahn et al. (2014) reported a decreasing trend of about 10 ‰ in δ13C values in the blue mussel *Mytilus edulis* when exposed to seawater conditions of pH 8.03 (*p*CO2 612 μatm) and pH of 7.21 (*p*CO2 4237 μatm). In corals, a species–specific δ13C response to high *p*CO2 conditions was reported by Krief et al. (2010) of more negative 2.3‰ and 1.5‰ δ13C values in *Porites* sp. after 14 months of culturing at low pH conditions (pH 7.49, *p*CO2 1908 μatm and 7.19 *p*CO2, 3976 μatm), whereas no significant difference was found in other coral species, such as *Stylophora pistillata* Esper, 1797. Given that the δ13CDIC in the water during the cultivation process of our specimens was low (δ13C VPDB: -23.63 ‰ for the low pH conditions and -2.03 ‰ for the control conditions, which corresponds to the pH2 phase), we can conclude that the negative shift is probably related to the C–source in the carbon dioxide gas used in culture setup. This was also previously suggested by McConnaughey et al. (2008), Poulain et al. (2010), and Hahn et al. (2014).

The δ13C and δ18O composition of *M. venosa* shells produced *during-culturing* is summarized in Table 11. The fractionation of carbon and oxygen isotopes between the seawater and calcite phase, is defined as Δ13Ccal–DIC or Δ18Ocal–sw = 1000 × lnαcal–DIC/sw,where αcal–DIC/sw  = [13C/12C]cal / [13C/12C]DIC or [18O/16O]cal / [18O/16O]sw, respectively.

Table 11. Carbon and oxygen fractionation in our cultured *M. venosa* specimens.

| Sample #ID | Treatment | Avg. Δ13Ccal-DIC | Avg. Δ18Ocal-sw |
| --- | --- | --- | --- |
| #8004 | Control | -4.06 | 29.99 |
| #9005 | Acidification pH2 | -1.21 | 30.92 |
| #9004 | Acidification pH2 | -2.23 | 30.70 |

For carbon isotopes, we observe a variability in Δ13Ccal-DIC between the different specimens, and it is inconclusive if this is linked to an ontogenetic variations or to differences between the individuals. It appears that there is about 2 ‰ difference between the control specimen and samples from the acidification (pH2) treatments, with the last one being, strikingly, more close to equilibrium with seawater DIC. Possibly, this illustrates the variability in kinetic effects, but may also be linked to a more changeable δ13CDIC in the control treatment. More measurements are however needed to fully answer this.

The Δ18Ocal–sw values show little variability between the specimens, with similar fractionation to that of inorganically precipitated carbonates (Watkins et al., 2013; around 30 per mille at similar seawater conditions). In addition, alike in the experiment of Watkins et al. (2013), we observe a slight trend in pH, with higher Δ18Ocal–sw at lower pH. This suggests that the Δ18Ocal–sw behaviour of *M. venosa* is not far from that of inorganic calcite.

Thus, we think that large part of the secondary layer isotope record may reflect the environmental conditions supporting the interpretation of brachiopod shells as good archives of geochemical proxies, even when stressed by ocean acidification.

**5 Conclusions**

This study combined the analysis of shell microstructure and stable isotope geochemistry on brachiopods cultured at low pH conditions for different time intervals, and suggests the following conclusions.

In brachiopod specimens cultured for a period of 11 months, the microstructure produced by the specimen cultured at low pH is different from that produced under control conditions. In particular, the microstructure produced at low pH tends to be more organic components-rich. A result that lends strong support to the brachiopod microstructure variations observed in the fossil record and related to the effect of ocean acidification.

Low pH conditions on brachiopod shell parts precipitated during culture conditions for about one year record a change in the microstructure but not in the growth rate.

δ13C and δ18O values are rather constant during growth but experience a sharp drop during culturing. In particular, the δ13C values of specimens cultured for one year at low pH conditions dropped abruptly. This was related to the source of carbon dioxide gas used in the culture setup

Brachiopods are thus faithful recorders of the ambient O and C isotope composition, even when stressed by environmental perturbations such as ocean acidification.

The present observations are invaluable in using specific proxies and shell morphologic features for studying ocean acidification events and changes in atmospheric CO2 contents in the geologic past.

**Acknowledgements:**

This project has received funding from the European Union’s Horizon 2020 research and innovation programme under the Marie Skłodowska–Curie grant agreement No 643084 (BASE–LiNE Earth). We would like to express our thanks to the scientific divers and staff of the Huinay Field Station, Chile. Vreni Haussermann is thanked for logist support. We thank Nina Hörner and Ulrike Holtz for help during culturing of the brachiopods at AWI, Dirk Nürnberg at GEOMAR for assistance with isotope analyses and Curzio Malinverno and Agostino Rizzi for technical support at Università di Milano.

**References:**

Ackerly, S., Cisne, J.L., Railsback, L.B., and Anderson, T.F.: Punctal density in the Ordovician orthide brachiopod *Paucicrura rogata*: anatomical and paleoenvironmental variation, Lethaia, 26, 17–24, 1993.

Amaral, V., Cabral, H.N., and Bishop, M.J.: Moderate acidification affects growth but not survival of 6–month–old oysters, Aquatic Ecol., 46, 119–127, 2012.

Atkinson, M.J., and Bingman, C.: Elemental composition of commercial seasalts, J. Aquaricult. Aquat. Sci., 8, 39–43, 1998.

Auclair, A.C., Joachimski, M.M., and Lécuyer, C.: Deciphering kinetic, metabolic and environmental controls on stable isotope fractionations between seawater and the shell of *Terebratalia transversa* (Brachiopoda), Chem. Geol., 202, 59–78, 2003.

Banner, J.L., and Kaufman, J.: The isotopic record of ocean chemistry and diagenesis preserved in non-luminescent brachiopods from Mississippian carbonate rocks, Illinois and Missouri, Geol. Soc. Am. Bull., 106, 1074–1082, 1994.

Baumgarten, S., Laudien, J., Jantzen, C., Häussermann, V., and Försterra, G.: Population structure, growth and production of a recent brachiopod from the Chilean fjord region, Mar. Ecol., 35, 401–413, 2013.

Beniash, E., Ivanina, A., Lieb, N.S., Kurochkin, I., and Sokolova, I.: Elevated level of carbon dioxide affects metabolism and shell formation in oysters *Crassostrea virginica*, Mar. Ecol., 419, 95–108, 2010.

Berge, J.A., Bjerkeng, B., Pettersen, O., Schaanning, M.T., and Øxnevad, S.: Effects of increased sea water concentrations of CO2 on growth of the bivalve *Mytilus edulis* L, Chemosphere, 62, 681–687, 2006.

Bibby, R., Cleall–Harding, P., Rundle, S., Widdicombe, S., and Spicer, J.: Ocean acidification disrupts induced defences in the intertidal gastropod *Littorina littorea*, Biol. Lett., 3, 699–701, 2007.

Brand, U., Logan, A., Hiller, N., and Richardson, J.: Geochemistry of modern brachiopods: applications and implications for oceanography and paleoceanography, Chem. Geol., 198, 305–334, 2003.

Brand, U., Logan, A., Bitner, M.A., Griesshaber, E., Azmy, K., and Buhl, D.: What is the ideal proxy of Palaeozoic seawater chemistry? Mem. Assoc. Australas., 41, 9–24, 2011.

Brand, U., Azmy, K., Bitner, M.A., Logan, A., Zuschin, M., Came, R., and Ruggiero, E., Oxygen isotopes and MgCO3 in brachiopod calcite and a new paleotemperature equation, Chem. Geol., 359, 23–31, 2013.

Brand, U., Azmy, K., Griesshaber, E., Bitner, M.A., Logan, A., Zuschin, M., Ruggiero, E., and Colin, P.L., Carbon isotope composition in modern brachiopod calcite: A case of equilibrium with seawater? Chem. Geol., 411, 81–96, 2015.

Brand, U., Blamey, N., Garbelli, C., Griesshaber, E., Posenato, R., Angiolini, L., Azmy, K., Farabegoli, E., and Came, R., Methane Hydrate: Killer cause of Earth's greatest mass extinction, Palaeoworld, 25, 496–507, 2016.

Büscher, J. V., Form, A. U., and Riebesell, U.: Interactive effects of ocean acidification and warming on growth, fitness and survival of the cold–water coral *Lophelia pertusa* under different food availabilities, Front. Mar. Sci., 4, 101, 2017.

Caldeira, K., and Wickett, M.E.: Anthropogenic carbon and ocean pH, Nature, 425, 365, 2003.

Caldeira, K., and Wichett, K.E.: Ocean model predictions of chemistry changes from carbon dioxide emissions to the atmosphere and ocean, J. Geophys. Res., 110, C09S04, 2005.

Campbell, K.S.W.: Australian Permian terebratuloids, Bur. Min Resour. Geol. Geophys. Aust. Bull., 68, l–113, 1965.

Carpenter S.J., and Lohmann K.C.: δ18O and δ13C values of modern brachiopod shells, Geochim. Cosmochim. Acta 59, 3749–3764, 1995.

Casella, L., Griesshaber, E., Simonet Roda, M., Ziegler, A., Mavromatis, V., Henkel, D., Laudien, J., Häussermann, V., Neuser, R.D., Angiolini, L., Dietzel, M., Eisenhauer, A., Immenhauser, A., Brand, U. and Schmahl, W.W.: Micro- and nanostructures reflect the degree of diagenetic alteration in modern and fossil brachiopod shell calcite: a multi–analytical screening approach (CL, FE–SEM, AFM, EBSD), Palaeogeogr. Palaeoclimatol. Palaeoecol., 502, 13–30, 2018.

Coleman, D.W., Byrne, M., and Davis, A.R.: Molluscs on acid: gastropod shell repair and strength in acidifying oceans, Mar. Ecol. Prog. Ser., 509, 203–211, 2014.

Comeau, S., Gorsky, G., Jeffree, R., Teyssie, J.L., and Gattuso, J.P.: Impact of ocean acidification on a key Arctic pelagic mollusc (*Limacina helicina*), Biogeosciences, 6, 1877–1182, 2009.

Cowen, R.: The Distribution of Punctae on the Brachiopod Shell, Geol. Mag., 103, 269–275, 1966.

Cross, E.L., Peck, L.S., and Harper, E.M.: Ocean acidification does not impact shell growth or repair of the Antarctic brachiopod *Liothyrella uva* (Broderip, 1833), J. Exp. Mar. Biol. Ecol., 462, 29–35, 2015.

Cross, E.L., Peck, L.S., Lamare, M.D., and Harper, E.M.: No ocean acidification effects on shell growth and repair in the New Zealand brachiopod *Calloria inconspicua* (Sowerby, 1846), ICES J. Mar. Sci., 73, 920–926, 2016.

Cross, E.L., Harper, E.M., and Peck, L.S.: A 120-year record of resilience to environmental change in brachiopods, Glob. Chang. Biol., https://doi.org/10.1111/gcb.14085, 2018.

Cummings, V., Hewitt, J., Rooyen, A.V., Currie, K., Beard, S., Thrush, S., Norkko, J., Barr, N., Heath, P., Halliday, N.J., Sedcole, R., Gomez, A., McGraw, C., and Metcalf, V.: Ocean acidification at high latitudes: potential effects on functioning of the Antarctic bivalve *Laternula elliptica*, PLoS ONE, 6, e16069, 2011.

Cusack, M., Dauphin Y., Cuif J.P., Salomé M., Freer A., and Yin H.: Micro–XANES mapping of sulphur and its association with magnesium and phosphorus in the shell of the brachiopod, *Terebratulina retusa*, Chem. Geol., 253, 172–179, 2008.

Cusack, M., Chung, P., Dauphin, Y., and Pérez–Huerta, A.: Brachiopod primary layer crystallography and nanostructure, in: Alvarez, F., and Curry, G.B., (Eds.): Evolution and Development of the Brachiopod Shell, Special Papers in Palaeontology, 84, Aberystwyth, Palaeontological Association, 99–105, 2010.

Crippa, G., Angiolini, L., Bottini, C., Erba, E., Felletti, F., Frigerio, C., Hennissen, J.A.I., Leng, M.J., Petrizzo, M.R., Raffi, I., Raineri, G., and Stephenson, M.H.: Seasonality fluctuations recorded in fossil bivalves during the early Pleistocene: Implications for climate change, Palaeogeogr. Palaeoclimatol. Palaeoecol., 446, 234–251, 2016a.

Crippa, G., Ye, F., Malinverno, C., and Rizzi, A.: Which is the best method to prepare invertebrate shells for SEM analysis? Testing different techniques on recent and fossil brachiopods, Boll. Soc. Paleontol. Ital., 55, 111–125, 2016b.

Dickinson, G.H., Ivanina, A.V., Matoo, O.B., [Pörtner](https://www.ncbi.nlm.nih.gov/pubmed/?term=P%C3%B6rtner%20HO%5BAuthor%5D&cauthor=true&cauthor_uid=22162851), H.O., Lannig, G., Bock, C., Beniash, E., and Sokolova, I.M.: Interactive effects of salinity and elevated CO2 levels on juvenile Eastern oysters, *Crassostrea virginica*, J. Exp. Biol., 215, 29–43, 2012.

England, J., Cusack, M., and Lee, M.R.: Magnesium and sulphur in the calcite shells of two brachiopods, *Terebratulina retusa* and *Novocrania anomala*, Lethaia, 40, 2–10, 2007.

Feely, R.A., Sabine, C.L., Lee, K., Berelson, W., Kleypas, J., Fabry, V.J., and Millero, F.J.: Impact of anthropogenic CO2 on the CaCO3 system in the oceans, Science, 305, 362–366, 2004.

Fernández–Reiriz, M.J., Range, P., Alvarez–Salgado, X.A., and Labarta, U.: Physiological energetics of juvenile clams *Ruditapes decussatus* in a high CO2 coastal ocean, Mar. Ecol. Prog. Ser., 433, 97–105, 2011.

Fernández–Reiriz, M.J., Range, P., Alvarez–Salgado, X.A., Espinosa, J., and Labarta, U.: Tolerance of juvenile *Mytilus galloprovincialis* to experimental seawater acidification, Mar. Ecol. Prog. Ser., 454, 65–74, 2012.

Fitzer, S., Phoenix, V.R., Cusack, M., and Kamenos, N.A.: Ocean acidification impacts mussel control on biomineralisation, Sci. Rep., 4, doi:10.1038/srep06218, 2014a.

Fitzer, S., Cusack, M., Phoenix, V.R., and Kamenos, N.A.: Ocean acidification reduces the crystallographic control in juvenile mussel shells, J. Struct. Biol., 188, 39–45, 2014b.

Form, A.U., and Riebesell, U.: Acclimation to ocean acidification during long–term CO2 exposure in the cold‐water coral *Lophelia pertusa*, Glob. Chang. Biol., 18, 843–3853, 2012.

Foster, M.W.: Recent Antarctic and Subantarctic brachiopods, Antarctic Research Series, 21, American Geophysical Union, Washington, D.C., pp. 183, 1974.

Försterra, G., Häussermann, V., and Lueter, C.: Mass occurrence of the recent brachiopod *Magellania venosa* (Terebratellidae) in the fjords Comau and Renihue, northern Patagonia, Chile, Mar. Ecol., 29, 342–347, 2008.

Garbelli, C., Angiolini, L., Brand, U., and Jadoul, F., Brachiopod fabric, classes and biogeochemistry: Implications for the reconstruction and interpretation of seawater carbon–isotope curves and records, Chem. Geol., 371, 60–67, 2014.

Garbelli, C.: Shell microstructures in Upper Permian brachiopods: implication for fabric evolution and calcification, Boll. Soc. Paleontol. Ital., 123, 541–560, 2017.

Garbelli, C., Angiolini, L., and Shen, S.Z.: Biomineralization and global change: A new perspective for understanding the end–Permian extinction, Geology, 45, 19–12, 2017.

Gobler, C.J., DePasquale, E.L., Griffith, A.W., and Baumann, H.: Hypoxia and acidification have additive and synergistic negative effects on the growth, survival, and metamorphosis of early life stage bivalves, PLoS ONE, 9, e83648, 2014.

Griesshaber, E., Schmahl1, W., Neuser, R., Job, R., Bluem, M., and Brand, U.: Microstructure of brachiopod shells–An inorganic/organic fibre composite with nanocrystalline protective layer, Mater. Res. Soc. Symp. Proc., 844, Y9.3.1–Y9.3.6, 2004.

Grossman, E.L., Zhang, C., and Yancey, T.E.: Stable–isotope stratigraphy of brachiopods from Pennsylvanian shales in Texas, Geol. Soc. Am. Bull., 103, 953–965, 1991.

Grossman, E.L., Mii, H., and Yancey, T.E.: Stable isotopes in Late Pennsylvanian brachiopods from the United Stated: Implications for Carboniferous paleoceanography, Geol. Soc. Am. Bull., 105, 1284–1296, 1993.

Guinotte, J.M., Orr, J., Cairns, S., Freiwald, A., Morgan, L., and George, R.: Will human–induced changes in sea water chemistry alter the distribution of deep-sea scleractinian corals? Front. Ecol. Environ., 1, 141–146, 2006.

Hahn, S., Rodolfo–Metalpa, R., Griesshaber, E., Schmahl, W.W., Buhl, D., Hall-Spencer, J.M., Baggini, C., Fehr, K.T., and Immenhauser, A.: Marine bivalve shell geochemistry and ultrastructure from modern low pH environments: environmental effect versus experimental bias, Biogeosciences, 9, 1897–1914, 2012.

Hahn, S., Griesshaber, E., Schmahl, W.W., Neuser, R.D., Ritter, A., Hoffmann, R., Buhl, D., Niedermayr, A., Geske, A., and Immenhauser, A.: Exploring aberrant bivalve shell ultrastructure and geochemistry as proxies for past sea water acidification, Sedimentology, 61, 1625–1658, 2014.

Hiebenthal, C., Philipp, E.E.R., Eisenhauer, A., and Wahl, M.: Effects of seawater *p*CO2 and temperature on shell growth, shell stability, condition and cellular stress of Western Baltic Sea *Mytilus edulis* (L.) and *Arctica islandica* (L.), Mar. Biol., 160, 2073–2087, 2013.

IPCC: Climate change 2013: the physical science basis, in: Stocker, T.F., Qin, D., Plattner, G. –K., Tignor, M., Allen, S.K., Boschung, J., Nauels, A., Xia, Y., Bex, V., and Midgley, P.M. (Eds.): Contribution of working group I to the fifth assessment report of the intergovernmental panel on climate change, Cambridge University Press, Cambridge, United Kingdom and New York, NY, USA, pp. 1535, 2013.

Jansson. A., Norkko, J., Dupont, S., and Norkko, A.: Growth and survival in a changing environment: Combined effects of moderate hypoxia and low pH on juvenile bivalve *Macoma balthica*, J. Sea Res., 102, 41–47, 2015.

Jantzen, C., Laudien, J., Sokol, S., Försterra, G., Häussermann, V., Kupprat, F., and Richter, C.: In situ short-term growth rates of a cold–water coral, Mar. Freshw. Res., 64, 631–641, 2013a.

Jantzen, C., Häussermann, V., Försterra, G, Laudien, J., Ardelan, M., Maier, S., and Richter, C.: Occurrence of a cold-water coral along natural pH gradients (Patagonia, Chile), Mar. Biol., 160, 2597–2607, 2013b.

Jantzen, C., Laudien, J., Häussermann, V., Försterra, G., and Richter, C.: Seawater carbonate chemistry measured in fjord Comau, Patagonia, Chile (02-2011), Alfred Wegener Institute, Helmholtz Center for Polar and Marine Research, Bremerhaven, PANGAEA, https://doi.pangaea.de/10.1594/PANGAEA.884131, https://doi.org/10.1594/PANGAEA.884131, 2017.

Jope, H.M.: Composition of brachiopod shell, in Moore, R.C. (Ed.): Treatise on Invertebrate Paleontology. Part H, Brachiopoda, Geological society of America and University of Kansas Press, New York and Lawrence, pp. 156–164, 1965.

Jurikova, H., Liebetrau, V., Gutjahr, M., Rollion–Bard, C., Hu, M.Y., Krause, S., Henkel, D., Hiebenthal, C., Schmidt, M., Laudien, J., and Eisenhauer, A.: Boron isotope systematics of cultured brachiopod calcite: the role of vital effects, response to acidification and implications for paleo–pH reconstructions, Geochim. Cosmochim. Acta, in review.

Krief, S., Hendy, E.J., Fine, M., Yam, R., Meibom, A., Foster, G.L., and Shemesh, A.: Physiological and isotopic responses of scleractinian corals to ocean acidification, Geochim. Cosmochim. Acta, 74, 4988–5001, 2010.

Kurihara, H.: Effects of CO2–driven ocean acidification on the early developmental stages of invertebrates, Mar. Ecol. Prog. Ser., 373, 274–284, 2008.

Lannig, G., Eilers, S., Pörtner, H.O., Sokolova, I.M., and Bock, C.: Impact of ocean acidification on energy metabolism of oyster, *Crassostrea gigas*–changes in metabolic pathways and thermal response, Mar. Drugs, 8, 2318–2339, 2010.

Laudien, J., Häussermann, V., Försterra, G., and Göhlich, H.: Physical oceanographic profiles of seven CTD casts from Gulf of Ancud into Comau Fjord in 2014, Alfred Wegener Institute, Helmholtz Center for Polar and Marine Research, Bremerhaven, PANGAEA, https://doi.org/10.1594/PANGAEA.832187, 2014.

Liu, W., and He, M.: Effects of ocean acidification on the metabolic rated of three species of bivalve from southern coast of China, Chin. J. Oceanol. Limn., 30, 206–211, 2012.

MacKinnon, D.I.: The shell structure in spiriferide brachiopoda, Bull. Br. Mus. Nat. Hist., 5, 189–258, 1974.

MacKinnon, D.I., and Williams, A.: Shell structure of terebratulid brachiopods, Palaeontology, 17, 179–202, 1974.

Marchant, H.K., Calosi, P., and Spicer, J.I.: Short–term exposure to hypercapnia does not compromise feeding, acid–base balance or respiration of *Patella vulgata* but surprisingly is accompanied by radula damage, J. Mar. Biolog. Assoc. U.K., 90, 1379–1384, 2010.

McClintock, J.B., Angus, R.A., Mcdonald, M.R., Amsler, C.D., Catledge, S.A., and Vohra, Y.K.: Rapid dissolution of shells of weakly calcified Antarctic benthic macroorganisms indicates high vulnerability to ocean acidification, Antarct. Sci., 21, 449–456, 2009.

McConnaughey, T.A., and Gillikin, D.P.: Carbon isotopes in mollusk shell carbonates, Geo–Mar. Lett., 28, 287–299, 2008.

McCulloch, M., Trotter, J., Montagna, P., Falter, J., Dunbar, R., Freiwald, A., Försterra, G., Lopez Correa, M., Maier, C., Ruggeberg, A., and Taviani, M.: Resilience of cold–water scleractinian corals to ocean acidification: Boron isotopic systematics of pH and saturation state up–regulation, Geochim. Cosmochim. Acta, 87, 21–34, 2012.

Melzner, F., Stange, P., Trübenbach, K., Thomsen, J., Casties, I., Panknin, U., Gorb, S.N., and Gutowska, M.A.: Food supply and seawater *p*CO2 impact calcification and internal shell dissolution in the blue mussel *Mytilus edulis*, PLoS ONE, 6, e24223, 2011.

Michaelidis, B., Ouzounis, C., Paleras, A., and Pörtner H.O.: Effects of long-term moderate hypercapnia on acid–base balance and growth rate in marine mussels *Mytilus galloprovincialis*, Mar. Ecol. Prog. Ser., 293, 109–118, 2005.

Mii, H.S., and Grossman, E.L.: Late Pennsylvanian seasonality reflected in the 18O and elemental composition of a brachiopod shell, Geology, 22, 661–664, 1994.

Mii, H.S., Grossman, E.L., Yancey, T.E., Chuvashov, B., and Egorov, A.: Isotopic records of brachiopod shells from the Russian Platform–evidence for the onset of mid–Carboniferous glaciation, Chem. Geol., 175, 133–147, 2001.

Milano, S., Schöne, B.R., Wang, S., and Müller, W.E.: Impact of high *p*CO2 on shell structure of the bivalve *Cerastoderma edule*, Mar. Environ. Res., 119, 144–155, 2016.

Mingliang, Z., Jianguang, F., Jihong, Z., Bin, L., Shengmin, R., Yuze, M., and Yaping, G.: Effect of marine acidification on calcification and respiration of *Chlamys farreri*, J. Shellfish Res., 30, 267–271, 2011.

Morse, J.W., Arvidson, R.S., and Luttge, A.: Calcium carbonate formation and dissolution, Chem. Rev., 107, 342–381, 2007.

Movilla, J., Orejas, C., Calvo, E., Gori, A., López Sanz, Á., Grinyó, J., Dominguez–Carrió, C., and Pelejero, C.: Differential response of two Mediterranean cold–water coral species to ocean acidification, Coral reefs, 33, 675–686, 2014.

Navarro, J.M., Torres, R., Acuna, K., Duarte, C., Manriquez, P.H., Lardies, M., Lagos, N.A., Vargas, C., and Aguilera, V.: Impact of medium–term exposure to elevated *p*CO2 levels on the physiological energetics of the mussel *Mytilus chilensis*, Chemosphere, 90, 1242–1248, 2013.

Nienhuis, S., Palmer, A.R., and Harley, C.D.G.: Elevated CO2 affects shell dissolution rate but not calcification rate in a marine snail, Philos. Trans. R. Soc. Lond., B, Biol. Sci., 277, 2553–2558, 2010.

Orr, J.C., Fabry, V.J., Aumont, O., Bopp, L., Doney, S.C., Feely, R.A., Gnanadesikan, A., Gruber, N., Ishida, A., Joos, F., Key, R.M., Lindsay, K., Maier-Reimer, E., Matear, R., Monfray, P., Mouchet, A., Najjar, R.G., Plattner, G.K., Rodgers, K.B., Sabine, C.L., Sarmiento, J.L., Schlitzer, R., Slater, R.D., Totterdell, I.J., Weirig, M.F., Yamanaka, Y., and Yool, A.: Anthropogenic ocean acidification over the twenty–first century and its impact on calcifying organisms, Nature, 437, 681–686, 2005.

Parker, L.M., Ross, P.M., and O’Connor, W.A.: Comparing the effect of elevated *p*CO2 and temperature on the fertilization and early development of two species of oysters, Mar. Biol.,157, 2435–2452, 2010.

Parker, L.M., Ross, P.M., and O’Connor, W.A.: Populations of the Sydney rock oyster, *Saccostrea glomerata*, vary in response to ocean acidification, Mar. Biol., 158, 689–697, 2011.

Parker, L.M., Ross, P.M., O’Connor, W.A., Borysko, L., Raftos, D.A., and Pörtner, H. –O.: Adult exposure influences offspring response to ocean acidification in oysters, Glob. Chang. Biol., 18, 82–92, 2012.

Parkinson, D., Curry, G.B., Cusack, M., and Fallick, A.E.: Shell structure, patterns and trends of oxygen and carbon stable isotopes in modern brachiopod shells, Chem. Geol., 219, 193–235, 2005.

Payne, J.L., and Clapham, M.E.: End–Permian mass extinction in the oceans: an ancient analog for the twenty-first century? Annu. Rev. Earth Planet. Sci., 40, 89–111, 2012.

Peck, L.S., Clarke, A., and Holmes, L.J.: Size, shape and the distribution of organic matter in the Recent Antarctic brachiopod *Liothyrella uva*, Lethaia, 20, 33–40, 1987.

Penman, D.E., Hönisch, B., Rasbury, E.T., Hemming, N.G., and Spero, H.J.: Boron, carbon, and oxygen isotopic composition of brachiopod shells: Intra–shell variability, controls, and potential as a paleo–pH recorder, Chem. Geol., 340, 32–39, 2013.

Pérez-Huerta, A., Cusack, M., McDonald, S., Marone, F., Stampanoni, M., and MacKay, S.: Brachiopod punctae: a complexity in shell biomineralisation, J. Struct. Biol., 167, 62–67, 2009.

Popp, B.N., Anderson, T.F., and Sandberg, P.A.: Brachiopods as indicators of original isotopic compositions in some Paleozoic limestones, Geol. Soc. Am. Bull., 97, 1262–1269, 1986.

Popov, L.E., Egerquist, E., and Holmer, L.E.: Earliest ontogeny of Middle Ordovician rhynchonelliform brachiopods (Clitambonitoidea and Polytoechioidea): implications for brachiopod phylogeny, Lethaia, 40, 85–96, 2007.

Poulain, C., Lorrain, A., Mas, R., Gillikin, D.P., Dehairs, F., Robert, R., and Paulet, Y.M.: Experimental shift of diet and DIC stable carbon isotopes: influence on shell δ13C values in the manila clam *Ruditapes philippinarum*, Chem. Geol., 272, 75–82, 2010.

Range, P., Chícharo, M.A., Ben-Hamadou, R., Piló, D., Matias, D., Joaquim, S., Oliveira, A.P., and Chícharo, L.: Calcification, growth and mortality of juvenile clams *Ruditapes decussatus* under increased *p*CO2 and reduced pH: Variable responses to ocean acidification at local scales? J. Exp. Mar. Biol. Ecol., 396, 177–184, 2011.

Range, P., Piló, D., Ben-Hamadou, R., Chícharo, M.A., Matias, D., Joaquim, S., Oliveira, A.P., and Chícharo, L.: Seawater acidification by CO2 in a coastal lagoon environment: Effects on life history traits of juvenile mussels *Mytilus galloprovincialis*, J. Exp. Mar. Biol. Ecol., 424–425, 89–98, 2012.

Ries, J.B., Cohen, A.L., and McCorkle, D.C.: Marine calcifiers exhibit mixed responses to CO2–induced ocean acidification, Geology, 37, 1131–1134, 2009.

Romanin, M., Crippa, G., Ye, F., Brand, U., Bitner, M.A., Gaspard, D., Häussermann, V., and Laudien J.: A sampling strategy for recent and fossil brachiopods: selecting the optimal shell segment for geochemical analyses, Riv. Ital. Paleontol. Stratigr., 124, 343–359, 2018.

Shirayama, Y., and Thornton, H.: Effect of increased atmospheric CO2 on shallow water marine benthos, J. Geophys. Res. Oceans, 110, C09S08, doi:10.1029/2004jc002618, 2005.

Smirnova, T.N., and Popiel–Barczyk, E.: Characteristics of the shell ultrastructure in Terebratellacea, in: Brachiopods through time, MacKinnon, D. I., Lee D. E., and Campbell, J. D. (Eds.): Balkema, Rotterdam, pp. 159–165, 1991.

Steckbauer, A., Ramajo, L., Hendriks, I.R., Fernandez, M., Lagos, N.A., Prado, L., and Duarte, C.M.: Synergistic effects of hypoxia and increasing CO2 on benthic invertebrates of the central Chilean coast, Front. Mar. Sci., 2, https://doi.org/10.3389/fmars.2015.00049, 2015.

Stemmer, K., Nehrke, G., and Brey, T.: Elevated CO2 levels do not affect the shell structure of the bivalve *Arctica islandica* from the Western Baltic, PLoS ONE, 8, e70103, 2013.

Suckling, C.C., Clark, M.M., Richard, J., Morley, S.A., Thorne, M.A., Harper, E.M., and Peck, L.S.: Adult acclimation to combined temperature and pH stressors significantly enhances reproductive outcomes compared to short–term exposures, J. Anim. Ecol., 84, 773–784, 2015.

Takayanagi, H., Asami, R., Abe, O., and Miyajima, T.: Intraspecific variations in carbon–isotope and oxygen–isotope compositions of a brachiopod *Basiliola lucida* collected off Okinawa–jima, southwestern Japan, Geochim. Cosmochim. Acta, 115, 115–136, 2013.

Talmage, S.C., and Gobler, C.J.: Effects of elevated temperature and carbon dioxide on the growth and survival of larvae and juveniles of three species of northwest Atlantic bivalves, PLoS ONE, 6, e26941, 2011.

Thomsen, J., and Melzner, F.: Moderate seawater acidification does not elicit long-term metabolic depression in the blue mussel *Mytilus edulis*, Mar. Biol., 157, 2667–2676, 2010.

Thomsen, J., Gutowska, M.A., Saphörster, J., Heinemann, A., Trübenbach, K., Fietzke, J., Hiebenthal, C., Eisenhauer, A., Körtzinger, A., Wahl, M., and Melzner, F.: Calcifying invertebrates succeed in a naturally CO2–rich coastal habitat but are threatened by high levels of future acidification, Biogeosciences, 7, 3879–3891, 2010.

Tukey, J.W.: Exploratory data analysis. Reading, PA: Addison–Wesley, 1977.

Ullmann, C.V., Frei, R., Korte, C., and Lüter, C.: Element/Ca, C and O isotope ratios in modern brachiopods: Species–specific signals of biomineralization, Chem. Geol., 460, 15–24, 2017.

Watkins, J.M., Nielsen, L.C., Ryerson, F.J., and DePaolo, D.J.: The influence of kinetics on the oxygen isotope composition of calcium carbonate, Earth Planet. Sci. Lett., 375, 349–360, 2013.

Watson, S., Peck, L.S., Tyler, P.A., Southgate, P.C., Tan, K.S., Day, R.W., and Morley, S.A.: Marine invertebrate skeleton size varies with latitude, temperature and carbonate saturation: implications for global change and ocean acidification, Glob. Chang. Biol., 18, 3026–3038, 2012.

Williams, A.: The calcareous shell of the Brachiopoda and its importance to their classification, Biol. Rev., 31, 243–287, 1956.

Williams, A.: Growth and structure of the shell of living articulate brachiopods, Nature, 211, 1146–1148, 1966.

Williams, A.: Evolution of the shell structure of articulate brachiopods, Spec. Pap. Palaeontol., 2, 1–55, 1968.

Williams, A.: The secretion and structural evolution of the shell of thecideidine brachiopods, Philos. Trans. R. Soc. Lond., B, Biol. Sci., 264, 439–478, 1973.

Williams, A.: Shell structure, in: Kaesler, R.L. (Ed.): Treatise on Invertebrate Paleontology, Part H, Revised, Brachiopoda, vol. 1, Geological Society of America Inc., and The University of Kansas, Boulder, Colorado, USA, pp. 267–320, 1997.

Williams, A., and Cusack, M.: Chemicostructural diversity of the brachiopod shell, in: Selden P.A. (Ed.): Treatise on Invertebrate Paleontology, Part H, Brachiopoda (Revised), vol. 6, Kansas: The Paleontological Institute, pp. 2396–2521, 2007.

Wood, H.L., Spicer, J.I., and Widdicombe, S.: Ocean acidification may increase calcification rates, but at a cost, Proc. R. Soc. Lond., B, Biol. Sci., 275, 1767–1773, 2008.

Yamamoto, K., Asami, R., and Iryu, Y.: Correlative relationships between carbon–and oxygen–isotope records in two cool-temperate brachiopod species off Otsuchi Bay, northeastern Japan, Paleontol. Res., 17, 12–26, 2013.

Ye, F., Crippa, G., Angiolini, L., Brand, U., Capitani, G., Cusack, M., Garbelli, C., Griesshaber, E., Harper, E., and Schmahl, W.: Mapping of recent brachiopod microstructure: a tool for environmental studies, J. Struct. Biol., 201, 221–236, 2018a.

Ye, F., Crippa, G., Garbelli, C., and Griesshaber, E.: Microstructural data of six recent brachiopod species: SEM, EBSD, morphometric and statistical analyses, Data in Brief, 18, 300–318, 2018b.
