# Supplementary material for: Variation in brachiopod microstructure and isotope geochemistry under low pH–ocean acidification–conditions
Source: Copernicus journal article supplement (doi:10.5194/bg-2018-332), 2018-07-24
Supplement: Supplementary file 2 [file Appendix dataset for M. venosa 20180711 submit.xlsx]

## Sheet: standard measurement of fibres
No.	No. of specimen	No. of SEM	No. of section	Species	Valve	Position1 IME	Position2 ACP	Feret (max) μm	Roundness	Convexity
	#158	MV158C 29	#158C	Magellania venosa	dorsal	internal	anterior	10.3438	0.278427	0.983675
	#158	MV158C 30	#158C	Magellania venosa	dorsal	internal	anterior	12.2185	0.366531	0.974058
	#158	MV158C 31	#158C	Magellania venosa	dorsal	internal	anterior	10.583	0.376581	0.97455
	#158	MV158D 24	#158D	Magellania venosa	dorsal	internal	anterior	12.4209	0.243542	0.981661
	#158	MV158C 26	#158C	Magellania venosa	dorsal	middle	anterior	10.3201	0.277588	0.974533
	#158	MV158C 26	#158C	Magellania venosa	dorsal	middle	anterior	8.03259	0.469237	0.980293
	#158	MV158C 27	#158C	Magellania venosa	dorsal	middle	anterior	9.18835	0.313762	0.978474
	#158	MV158C 28	#158C	Magellania venosa	dorsal	middle	anterior	10.8093	0.310648	0.975418
	#158	MV158D 16	#158D	Magellania venosa	dorsal	middle	anterior	11.6519	0.326318	0.983634
	#158	MV158D 18	#158D	Magellania venosa	dorsal	middle	anterior	11.6345	0.348241	0.979641
	#158	MV158D 19	#158D	Magellania venosa	dorsal	middle	anterior	10.9515	0.291962	0.966712
	#158	MV158C 23	#158C	Magellania venosa	dorsal	external	central	11.6224	0.380159	0.982051
	#158	MV158D 15	#158D	Magellania venosa	dorsal	external	central	13.5947	0.361555	0.977727
	#158	MV158C 10	#158C	Magellania venosa	dorsal	middle	central	17.8761	0.208011	0.981137
	#158	MV158C 11	#158C	Magellania venosa	dorsal	middle	central	12.8386	0.331234	0.979973
	#158	MV158C 12	#158C	Magellania venosa	dorsal	middle	central	11.7726	0.282219	0.9821
	#158	MV158C 13	#158C	Magellania venosa	dorsal	middle	central	16.9027	0.192418	0.99187
	#158	MV158C 14	#158C	Magellania venosa	dorsal	middle	central	11.7052	0.366122	0.98413
	#158	MV158C 15	#158C	Magellania venosa	dorsal	middle	central	11.7032	0.281206	1.00024
	#158	MV158C 25	#158C	Magellania venosa	dorsal	middle	central	11.6122	0.415814	0.996934
	#158	MV158C 25	#158C	Magellania venosa	dorsal	middle	central	12.2813	0.370198	0.973464
	#158	MV158D 11	#158D	Magellania venosa	dorsal	middle	central	9.8422	0.428503	0.973964
	#158	MV158D 13	#158D	Magellania venosa	dorsal	middle	central	13.0973	0.28264	0.977173
	#158	MV158D 14	#158D	Magellania venosa	dorsal	middle	central	14.4209	0.297731	0.988491
	#158	MV158D 9	#158D	Magellania venosa	dorsal	middle	central	12.1605	0.38925	0.982459
	#158	MV158C 8	#158C	Magellania venosa	dorsal	external	posterior	21.9856	0.209931	0.984264
	#158	MV158C 9	#158C	Magellania venosa	dorsal	external	posterior	23.7424	0.168603	0.984461
	#158	MV158D 2	#158D	Magellania venosa	dorsal	external	posterior	14.8691	0.23843	0.998381
	#158	MV158D 3	#158D	Magellania venosa	dorsal	external	posterior	13.3039	0.268113	0.979443
	#158	MV158D 4	#158D	Magellania venosa	dorsal	external	posterior	13.4955	0.201555	0.994418
	#158	158 BAS	#158B	Magellania venosa	ventral	external	anterior	7.64783	0.37559	0.975197
	#158	158 BAS	#158B	Magellania venosa	ventral	external	anterior	7.66962	0.451021	0.979488
	#158	158 BAS	#158B	Magellania venosa	ventral	external	anterior	7.99548	0.38563	0.978437
	#158	158 BAS	#158B	Magellania venosa	ventral	external	anterior	6.76541	0.445632	0.989489
	#158	158 BAS	#158B	Magellania venosa	ventral	external	anterior	6.01099	0.570583	0.982029
	#158	158 BAS	#158B	Magellania venosa	ventral	external	anterior	5.49591	0.525737	0.98038
	#158	158 BAS	#158B	Magellania venosa	ventral	external	anterior	6.34338	0.669075	0.98842
	#158	158 BM BAS	#158B	Magellania venosa	ventral	external	anterior	4.54277	0.493276	0.975473
	#158	M158A1 15	#158A1	Magellania venosa	ventral	internal	anterior	8.37219	0.27861	0.97327
	#158	M158A1 16	#158A1	Magellania venosa	ventral	internal	anterior	7.85156	0.368714	0.985958
	#158	M158A1 16	#158A1	Magellania venosa	ventral	internal	anterior	8.37537	0.326427	1.00585
	#158	M158A1 16	#158A1	Magellania venosa	ventral	internal	anterior	7.20239	0.340774	0.98508
	#158	M158A1 3	#158A1	Magellania venosa	ventral	internal	anterior	13.207	0.392265	0.981123
	#158	M158A1 3	#158A1	Magellania venosa	ventral	internal	anterior	11.6913	0.471398	0.985856
	#158	M158A1 4	#158A1	Magellania venosa	ventral	internal	anterior	13.5433	0.369258	0.989527
	#158	M158A1 4	#158A1	Magellania venosa	ventral	internal	anterior	10.6549	0.456597	0.993411
	#158	M158A1 6	#158A1	Magellania venosa	ventral	internal	anterior	11.9152	0.357912	0.978508
	#158	158 BM BAS	#158B	Magellania venosa	ventral	internal	anterior	35.0563	0.113629	0.988166
	#158	158 BM BAS	#158B	Magellania venosa	ventral	internal	anterior	21.4224	0.19328	0.993311
	#158	MV158B 2	#158B	Magellania venosa	ventral	internal	anterior	12.1661	0.274608	0.974906
	#158	MV158B 5	#158B	Magellania venosa	ventral	internal	anterior	9.2821	0.348579	0.987679
	#158	M158A1 19	#158A1	Magellania venosa	ventral	middle	anterior	9.6123	0.422177	0.973515
	#158	M158A1 8	#158A1	Magellania venosa	ventral	middle	anterior	11.0366	0.416609	0.989566
	#158	158 BAS	#158B	Magellania venosa	ventral	middle	anterior	8.91797	0.368764	0.982515
	#158	158 BAS	#158B	Magellania venosa	ventral	middle	anterior	9.97217	0.370478	0.984889
	#158	158 BAS	#158B	Magellania venosa	ventral	middle	anterior	8.93188	0.348077	0.98102
	#158	158 BAS	#158B	Magellania venosa	ventral	middle	anterior	8.64307	0.450125	0.975067
	#158	158 BAS	#158B	Magellania venosa	ventral	middle	anterior	10.194	0.323363	0.985751
	#158	158 BAS	#158B	Magellania venosa	ventral	middle	anterior	7.99609	0.355039	0.98373
	#158	158 BAS	#158B	Magellania venosa	ventral	middle	anterior	15.8972	0.208021	0.97999
	#158	158 BAS	#158B	Magellania venosa	ventral	middle	anterior	8.79361	0.317172	0.98972
	#158	158 BAS	#158B	Magellania venosa	ventral	middle	anterior	9.88201	0.366922	0.98195
	#158	158 BAS	#158B	Magellania venosa	ventral	middle	anterior	9.28488	0.454048	0.985454
	#158	158 BAS	#158B	Magellania venosa	ventral	middle	anterior	8.11209	0.401089	0.989588
	#158	158 BAS	#158B	Magellania venosa	ventral	middle	anterior	9.14676	0.412218	0.994084
	#158	158 BAS	#158B	Magellania venosa	ventral	middle	anterior	9.99274	0.348184	0.989763
	#158	158 BAS	#158B	Magellania venosa	ventral	middle	anterior	9.22021	0.406211	0.985756
	#158	158 BAS	#158B	Magellania venosa	ventral	middle	anterior	9.32104	0.346857	0.970361
	#158	158 BM BAS	#158B	Magellania venosa	ventral	middle	anterior	11.5388	0.37602	0.98257
	#158	158BAS2	#158B	Magellania venosa	ventral	middle	anterior	8.49558	0.237151	0.987201
	#158	158BAS2	#158B	Magellania venosa	ventral	middle	anterior	6.74199	0.386579	0.969468
	#158	158BAS2	#158B	Magellania venosa	ventral	middle	anterior	7.74045	0.409094	0.964584
	#158	158BAS2	#158B	Magellania venosa	ventral	middle	anterior	7.46313	0.291332	0.992845
	#158	158BAS2	#158B	Magellania venosa	ventral	middle	anterior	8.36206	0.291907	0.991195
	#158	158BAS2	#158B	Magellania venosa	ventral	middle	anterior	7.96964	0.356057	0.983261
	#158	158BAS2	#158B	Magellania venosa	ventral	middle	anterior	11.2219	0.291956	0.986989
	#158	158BAS2	#158B	Magellania venosa	ventral	middle	anterior	9.63757	0.327298	0.983768
	#158	158BAS2	#158B	Magellania venosa	ventral	middle	anterior	7.64807	0.484458	0.993878
	#158	MV158B 3	#158B	Magellania venosa	ventral	middle	anterior	9.22592	0.373801	0.974285
	#158	MV158B 7	#158B	Magellania venosa	ventral	middle	anterior	9.39294	0.400391	0.993415
	#158	M158A2 7	#158A2	Magellania venosa	ventral	external	central	6.28699	0.412956	0.979091
	#158	M158A2 8	#158A2	Magellania venosa	ventral	external	central	8.11108	0.433979	0.979448
	#158	MV158B 12	#158B	Magellania venosa	ventral	external	central	14.5388	0.356205	0.983623
	#158	MV158B 13	#158B	Magellania venosa	ventral	external	central	10.6785	0.418248	0.977324
	#158	M158A2 14	#158A2	Magellania venosa	ventral	internal	central	10.4946	0.358404	0.977672
	#158	M158A2 21	#158A2	Magellania venosa	ventral	internal	central	11.5947	0.241492	0.975147
	#158	M158A2 5	#158A2	Magellania venosa	ventral	internal	central	14.9491	0.346347	0.992781
	#158	M158A2 6	#158A2	Magellania venosa	ventral	internal	central	10.5868	0.383531	0.983226
	#158	M158A2 9	#158A2	Magellania venosa	ventral	internal	central	11.3362	0.272293	0.970367
	#158	158 BM BAS	#158B	Magellania venosa	ventral	internal	central	8.22321	0.472442	0.985698
	#158	158 BM BAS	#158B	Magellania venosa	ventral	internal	central	11.7403	0.394565	0.993257
	#158	158 BM BAS	#158B	Magellania venosa	ventral	internal	central	9.82758	0.428745	0.989143
	#158	M158A2 12	#158A2	Magellania venosa	ventral	middle	central	7.08887	0.488958	0.984921
	#158	M158A2 12	#158A2	Magellania venosa	ventral	middle	central	7.62305	0.518173	0.990743
	#158	M158A2 18	#158A2	Magellania venosa	ventral	middle	central	11.2684	0.236775	0.97456
	#158	M158A2 18	#158A2	Magellania venosa	ventral	middle	central	13.0383	0.26377	0.987444
	#158	158 BM BAS	#158B	Magellania venosa	ventral	middle	central	15.1924	0.28021	0.991708
	#158	158 BM BAS	#158B	Magellania venosa	ventral	middle	central	10.7004	0.321861	0.980162
	#158	158 BM BAS	#158B	Magellania venosa	ventral	middle	central	10.517	0.226769	0.986513
	#158	158 BM BAS	#158B	Magellania venosa	ventral	middle	central	11.245	0.308145	0.978905
	#158	158 BM BAS	#158B	Magellania venosa	ventral	middle	central	16.3392	0.178645	0.993804
	#158	158 BM BAS	#158B	Magellania venosa	ventral	middle	central	13.5581	0.389137	0.985324
	#158	158 BM BAS	#158B	Magellania venosa	ventral	middle	central	15.4398	0.297462	0.982457
	#158	158 BM BAS	#158B	Magellania venosa	ventral	middle	central	10.2327	0.282093	0.978623
	#158	158 BM BAS	#158B	Magellania venosa	ventral	middle	central	12.0488	0.250037	0.989121
	#158	158 BM BAS	#158B	Magellania venosa	ventral	middle	central	14.9989	0.326664	0.978591
	#158	158 BM BAS	#158B	Magellania venosa	ventral	middle	central	11.1271	0.364113	0.985471
	#158	158 BM BAS	#158B	Magellania venosa	ventral	middle	central	17.0492	0.34061	0.999931
	#158	158 BM BAS	#158B	Magellania venosa	ventral	middle	central	14.5477	0.347929	0.985854
	#158	158 BM BAS	#158B	Magellania venosa	ventral	middle	central	14.0747	0.366619	0.986029
	#158	MV158B 9	#158B	Magellania venosa	ventral	middle	central	9.0647	0.25725	0.97241
	#158	M158A3 14	#158A3	Magellania venosa	ventral	external	posterior	6.97348	0.475038	0.990619
	#158	MV158B 16	#158B	Magellania venosa	ventral	external	posterior	15.2833	0.252685	0.989233
	#158	MV158B 17	#158B	Magellania venosa	ventral	external	posterior	16.1258	0.264838	0.98334
	#158	MV158B 18	#158B	Magellania venosa	ventral	external	posterior	14.501	0.35397	0.979081
	#158	MV158B 19	#158B	Magellania venosa	ventral	external	posterior	14.6554	0.266646	0.988901
	#158	M158A3 28	#158A3	Magellania venosa	ventral	middle	posterior	12.8604	0.444727	0.983813
	#158	M158A3 30	#158A3	Magellania venosa	ventral	middle	posterior	13.946	0.350745	0.987521
	#158	M158A3 5	#158A3	Magellania venosa	ventral	middle	posterior	12.3691	0.493932	0.981634
	#223	MV223C 22	#223C	Magellania venosa	dorsal	internal	anterior	13.105	0.246309	0.970876
	#223	MV223D 20	#223D	Magellania venosa	dorsal	internal	anterior	15.4841	0.223194	0.983097
	#223	MV223C 19	#223C	Magellania venosa	dorsal	middle	anterior	12.9359	0.326424	0.967915
	#223	MV223C 20	#223C	Magellania venosa	dorsal	middle	anterior	13.2325	0.311258	0.981135
	#223	MV223C 8	#223C	Magellania venosa	dorsal	external	posterior	17.7876	0.238088	0.982841
	#223	MV223D 6	#223D	Magellania venosa	dorsal	external	posterior	24.457	0.175371	0.981623
	#223	MV223D 7	#223D	Magellania venosa	dorsal	external	posterior	17.2594	0.257955	0.986883
	#223	223 BA BM	#223B	Magellania venosa	ventral	external	anterior	5.27603	0.271205	0.993963
	#223	223 BA BM	#223B	Magellania venosa	ventral	external	anterior	5.05132	0.466864	0.992588
	#223	223 BA BM	#223B	Magellania venosa	ventral	external	anterior	5.09424	0.353836	0.986643
	#223	223 BAS	#223B	Magellania venosa	ventral	external	anterior	4.82693	0.538287	0.989776
	#223	223 BAS	#223B	Magellania venosa	ventral	external	anterior	7.25422	0.438971	0.979164
	#223	223 BAS	#223B	Magellania venosa	ventral	external	anterior	5.2184	0.436552	0.992884
	#223	223 BAS	#223B	Magellania venosa	ventral	external	anterior	4.58789	0.521783	0.96832
	#223	223 BAS	#223B	Magellania venosa	ventral	external	anterior	4.95804	0.62481	0.970236
	#223	223 BAS	#223B	Magellania venosa	ventral	external	anterior	7.14697	0.473912	0.970006
	#223	223 BAS	#223B	Magellania venosa	ventral	external	anterior	4.93127	0.595208	0.983152
	#223	223 BAS	#223B	Magellania venosa	ventral	external	anterior	5.54572	0.545371	0.985885
	#223	223 BA BM	#223B	Magellania venosa	ventral	internal	anterior	9.4165	0.267927	0.974402
	#223	MV223A 30	#223A	Magellania venosa	ventral	middle	anterior	13.3497	0.387196	0.970755
	#223	MV223A 32	#223A	Magellania venosa	ventral	middle	anterior	12.8994	0.191952	0.973496
	#223	223 BA BM	#223B	Magellania venosa	ventral	middle	anterior	7.55084	0.267522	0.992991
	#223	223 BAS	#223B	Magellania venosa	ventral	middle	anterior	11.8879	0.259667	0.977247
	#223	223 BAS	#223B	Magellania venosa	ventral	middle	anterior	7.75317	0.348496	0.985797
	#223	223 BAS	#223B	Magellania venosa	ventral	middle	anterior	11.6574	0.319596	0.987197
	#223	223 BAS	#223B	Magellania venosa	ventral	middle	anterior	10.8377	0.332661	0.990397
	#223	223 BA BM	#223B	Magellania venosa	ventral	external	central	11.5373	0.288263	0.979427
	#223	223 BA BM	#223B	Magellania venosa	ventral	external	central	17.8633	0.253117	0.988362
	#223	223 BA BM	#223B	Magellania venosa	ventral	external	central	18.0079	0.292269	0.99189
	#223	223 BA BM	#223B	Magellania venosa	ventral	internal	central	16.7669	0.310575	0.986755
	#223	MV223A 28	#223A	Magellania venosa	ventral	middle	central	12.2349	0.338719	0.986826
	#223	223 BA BM	#223B	Magellania venosa	ventral	middle	central	13.5717	0.23857	0.982895
	#223	223 BA BM	#223B	Magellania venosa	ventral	middle	central	15.9702	0.261645	0.983758
	#223	223 BA BM	#223B	Magellania venosa	ventral	middle	central	14.9143	0.213734	0.988233
	#223	223 BA BM	#223B	Magellania venosa	ventral	middle	central	17.0079	0.244211	0.976363
	#223	223 BA BM	#223B	Magellania venosa	ventral	middle	central	10.5183	0.255844	0.980702
	#223	223 BA BM	#223B	Magellania venosa	ventral	middle	central	20.6125	0.259302	0.988763
	#223	223 BA BM	#223B	Magellania venosa	ventral	middle	central	12.853	0.282299	0.978239
	#223	223 BA BM	#223B	Magellania venosa	ventral	middle	central	13.0658	0.244436	0.982288
	#223	223 BA BM	#223B	Magellania venosa	ventral	middle	central	14.7081	0.219476	0.985356
	#223	223 BA BM	#223B	Magellania venosa	ventral	middle	central	7.89514	0.485254	0.9882
	#223	MV223B 10	#223B	Magellania venosa	ventral	middle	central	12.7881	0.305336	0.984934
	#223	MV223B 11	#223B	Magellania venosa	ventral	middle	central	14.2183	0.264132	0.983906
	#223	MV223A 14	#223A	Magellania venosa	ventral	external	posterior	11.6836	0.301832	0.98056
	#223	MV223B 8	#223B	Magellania venosa	ventral	external	posterior	17.3306	0.238613	0.983193
	#223	MV223A 3	#223A	Magellania venosa	ventral	middle	posterior	18.4075	0.25934	0.989757
	#43	MV43C 14	#43C	Magellania venosa	dorsal	internal	anterior	10.6832	0.263947	0.983993
	#43	MV43C 16	#43C	Magellania venosa	dorsal	internal	anterior	12.3066	0.213559	0.979256
	#43	MV43D 22	#43D	Magellania venosa	dorsal	internal	anterior	13.666	0.254557	0.997584
	#43	MV43D 24	#43D	Magellania venosa	dorsal	internal	anterior	12.0993	0.25691	0.970261
	#43	MV43D 26	#43D	Magellania venosa	dorsal	internal	anterior	14.1534	0.194787	0.970149
	#43	MV43D 27	#43D	Magellania venosa	dorsal	internal	anterior	16.6182	0.17473	0.967551
	#43	MV43D 20	#43D	Magellania venosa	dorsal	middle	anterior	13.5958	0.299226	0.981914
	#43	MV43D 21	#43D	Magellania venosa	dorsal	middle	anterior	9.4967	0.421135	0.982027
	#43	MV43C 6	#43C	Magellania venosa	dorsal	external	central	14.1781	0.366855	0.967319
	#43	MV43D 19	#43D	Magellania venosa	dorsal	external	central	14.1045	0.30696	0.980567
	#43	MV43C 13	#43C	Magellania venosa	dorsal	internal	central	10.505	0.301222	0.98641
	#43	MV43D 16	#43D	Magellania venosa	dorsal	internal	central	15.8531	0.201373	0.977099
	#43	MV43D 17	#43D	Magellania venosa	dorsal	internal	central	15.7186	0.178635	0.979805
	#43	MV43C 10	#43C	Magellania venosa	dorsal	middle	central	12.3476	0.363777	0.987824
	#43	MV43C 10	#43C	Magellania venosa	dorsal	middle	central	12.6274	0.306864	0.984784
	#43	MV43C 11	#43C	Magellania venosa	dorsal	middle	central	15.5721	0.280109	0.975405
	#43	MV43C 11	#43C	Magellania venosa	dorsal	middle	central	10.9838	0.378447	0.977674
	#43	MV43C 8	#43C	Magellania venosa	dorsal	middle	central	14.7611	0.283158	0.975802
	#43	MV43C 9	#43C	Magellania venosa	dorsal	middle	central	13.1035	0.2407	0.97646
	#43	MV43D 11	#43D	Magellania venosa	dorsal	middle	central	15.8565	0.278967	0.985024
	#43	MV43D 14	#43D	Magellania venosa	dorsal	middle	central	13.3122	0.309515	0.987925
	#43	MV43D 9	#43D	Magellania venosa	dorsal	middle	central	12.0637	0.22193	0.973404
	#43	MV43C 2	#43C	Magellania venosa	dorsal	external	posterior	22.2922	0.33639	0.990817
	#43	MV43D 6	#43D	Magellania venosa	dorsal	external	posterior	17.2715	0.199067	0.987004
	#43	MV43D 7	#43D	Magellania venosa	dorsal	external	posterior	18.6869	0.277512	0.986923
	#43	MV43D 8	#43D	Magellania venosa	dorsal	external	posterior	19.8555	0.230008	0.997679
	#43	43 A3 AS BAS	#43A	Magellania venosa	ventral	external	anterior	4.43417	0.459921	0.995376
	#43	43 A3 AS BAS	#43A	Magellania venosa	ventral	external	anterior	4.21829	0.524887	0.987071
	#43	43 A3 AS BAS	#43A	Magellania venosa	ventral	external	anterior	5.94116	0.45196	0.976271
	#43	43 A3 AS BAS	#43A	Magellania venosa	ventral	external	anterior	5.98804	0.431873	0.997713
	#43	43 A3 AS BAS	#43A	Magellania venosa	ventral	external	anterior	4.19989	0.704047	0.972123
	#43	43 A3 BA BM	#43B	Magellania venosa	ventral	external	anterior	5.13274	0.576271	0.975826
	#43	43 A3 BA BM	#43B	Magellania venosa	ventral	external	anterior	4.96088	0.522398	0.97754
	#43	43 BAS	#43B	Magellania venosa	ventral	external	anterior	5.19379	0.433224	0.98218
	#43	43 BAS	#43B	Magellania venosa	ventral	external	anterior	4.68426	0.566881	0.991784
	#43	43 BAS	#43B	Magellania venosa	ventral	external	anterior	8.15698	0.357107	0.96456
	#43	43 BM A3 AS	#43B	Magellania venosa	ventral	internal	anterior	23.0823	0.105741	0.993892
	#43	43 BM A3 AS	#43B	Magellania venosa	ventral	internal	anterior	20.2251	0.110789	0.992773
	#43	43 A3 AS BAS	#43A	Magellania venosa	ventral	middle	anterior	12.8319	0.282545	0.995735
	#43	43 A3 AS BAS	#43A	Magellania venosa	ventral	middle	anterior	10.1167	0.3962	0.988708
	#43	43 A3 AS BAS	#43A	Magellania venosa	ventral	middle	anterior	11.7646	0.317944	0.989123
	#43	43 A3 AS BAS	#43A	Magellania venosa	ventral	middle	anterior	10.0145	0.267782	0.974267
	#43	43 A3 AS BAS	#43A	Magellania venosa	ventral	middle	anterior	13.0864	0.246625	0.992424
	#43	43 A3 AS2	#43A	Magellania venosa	ventral	middle	anterior	10.7093	0.262009	0.99912
	#43	43 A3 AS2	#43A	Magellania venosa	ventral	middle	anterior	13.51	0.210434	0.984429
	#43	43 A3 AS2	#43A	Magellania venosa	ventral	middle	anterior	8.18005	0.412378	0.988249
	#43	43 A3 AS2	#43A	Magellania venosa	ventral	middle	anterior	8.26727	0.364312	0.989119
	#43	43 A3 AS2	#43A	Magellania venosa	ventral	middle	anterior	7.01343	0.224457	0.986029
	#43	43 A3 AS2	#43A	Magellania venosa	ventral	middle	anterior	9.66687	0.461429	0.990468
	#43	43 A3 AS2	#43A	Magellania venosa	ventral	middle	anterior	7.93433	0.2775	0.991895
	#43	43 A3 BA BM	#43B	Magellania venosa	ventral	middle	anterior	8.14246	0.363111	1.01446
	#43	43 A3 BA BM	#43B	Magellania venosa	ventral	middle	anterior	8.13224	0.47002	0.959267
	#43	43 A3 BA BM	#43B	Magellania venosa	ventral	middle	anterior	5.62564	0.374655	0.972673
	#43	43 BAS	#43B	Magellania venosa	ventral	middle	anterior	11.9055	0.342825	0.992866
	#43	43 BAS	#43B	Magellania venosa	ventral	middle	anterior	12.6306	0.176704	0.98338
	#43	43 BAS	#43B	Magellania venosa	ventral	middle	anterior	9.7855	0.423357	0.988186
	#43	43 BAS	#43B	Magellania venosa	ventral	middle	anterior	13.0518	0.227551	0.984728
	#43	43 BAS	#43B	Magellania venosa	ventral	middle	anterior	19.7976	0.184671	0.992555
	#43	43 BAS	#43B	Magellania venosa	ventral	middle	anterior	14.606	0.207761	0.987695
	#43	43 BAS	#43B	Magellania venosa	ventral	middle	anterior	10.9546	0.340023	0.989833
	#43	43 BAS	#43B	Magellania venosa	ventral	middle	anterior	12.8774	0.323488	0.994216
	#43	43 BAS2	#43B	Magellania venosa	ventral	middle	anterior	12.7781	0.335243	0.970757
	#43	43 BAS2	#43B	Magellania venosa	ventral	middle	anterior	13.2872	0.31052	0.977403
	#43	43 BAS2	#43B	Magellania venosa	ventral	middle	anterior	13.3016	0.374991	0.97996
	#43	43 BAS2	#43B	Magellania venosa	ventral	middle	anterior	8.98498	0.411866	0.993289
	#43	43 BAS2	#43B	Magellania venosa	ventral	middle	anterior	15.7712	0.254804	0.988295
	#43	43 BAS2	#43B	Magellania venosa	ventral	middle	anterior	8.00971	0.497549	0.950328
	#43	43 BAS2	#43B	Magellania venosa	ventral	middle	anterior	13.385	0.207648	0.982134
	#43	43 BAS2	#43B	Magellania venosa	ventral	middle	anterior	14.4648	0.304125	0.98164
	#43	43 BAS2	#43B	Magellania venosa	ventral	middle	anterior	14.0252	0.355378	0.99106
	#43	43 BAS2	#43B	Magellania venosa	ventral	middle	anterior	12.1008	0.380332	0.991871
	#43	43 BAS2	#43B	Magellania venosa	ventral	middle	anterior	14.9692	0.274877	0.989155
	#43	43 BAS2	#43B	Magellania venosa	ventral	middle	anterior	16.8285	0.217745	0.993512
	#43	43 BAS2	#43B	Magellania venosa	ventral	middle	anterior	13.9165	0.259852	0.990194
	#43	43 BAS2	#43B	Magellania venosa	ventral	middle	anterior	14.6221	0.24024	0.987586
	#43	43 BAS2	#43B	Magellania venosa	ventral	middle	anterior	10.9861	0.416021	0.983057
	#43	43 BM A3 AS	#43B	Magellania venosa	ventral	middle	anterior	6.83887	0.414577	0.98443
	#43	43 BM A3 AS	#43B	Magellania venosa	ventral	middle	anterior	10.626	0.231689	0.981833
	#43	43 BM A3 AS	#43B	Magellania venosa	ventral	middle	anterior	6.55176	0.409121	0.97111
	#43	43 BM A3 AS	#43B	Magellania venosa	ventral	middle	anterior	13.3972	0.217361	0.97676
	#43	MV43B 18	#43B	Magellania venosa	ventral	middle	anterior	12.8486	0.335449	0.977417
	#43	MV43B 18	#43B	Magellania venosa	ventral	middle	anterior	10.5898	0.405595	0.989572
	#43	MV43B 19	#43B	Magellania venosa	ventral	middle	anterior	14.1378	0.323632	0.979455
	#43	43 A3 BA BM	#43B	Magellania venosa	ventral	external	central	12.3003	0.321422	0.989894
	#43	43 A3 BA BM	#43B	Magellania venosa	ventral	external	central	11.4062	0.463319	0.974311
	#43	43 BM A3 AS	#43B	Magellania venosa	ventral	external	central	6.7738	0.428085	0.971935
	#43	43 BM A3 AS	#43B	Magellania venosa	ventral	external	central	8.58234	0.321308	0.971526
	#43	MV43B 13	#43B	Magellania venosa	ventral	external	central	10.7556	0.353003	0.961118
	#43	43 A3 BA BM	#43B	Magellania venosa	ventral	internal	central	15.5242	0.267921	0.991164
	#43	43 A3 BA BM	#43B	Magellania venosa	ventral	internal	central	19.7615	0.34701	0.986309
	#43	43 BM A3 AS	#43B	Magellania venosa	ventral	internal	central	18.4954	0.299842	0.979753
	#43	43 BM A3 AS	#43B	Magellania venosa	ventral	internal	central	14.6136	0.291797	0.976832
	#43	43 BM A3 AS	#43B	Magellania venosa	ventral	internal	central	17.3156	0.302479	0.984594
	#43	43 A3 BA BM	#43B	Magellania venosa	ventral	middle	central	13.0315	0.322488	0.975457
	#43	43 A3 BA BM	#43B	Magellania venosa	ventral	middle	central	17.4926	0.281996	0.995311
	#43	43 A3 BA BM	#43B	Magellania venosa	ventral	middle	central	15.3823	0.317878	0.986348
	#43	43 A3 BA BM	#43B	Magellania venosa	ventral	middle	central	14.7354	0.345251	0.982695
	#43	43 A3 BA BM	#43B	Magellania venosa	ventral	middle	central	13.3852	0.400774	0.977318
	#43	43 BM A3 AS	#43B	Magellania venosa	ventral	middle	central	15.047	0.332022	0.983287
	#43	43 BM A3 AS	#43B	Magellania venosa	ventral	middle	central	10.7685	0.408826	0.977798
	#43	43 BM A3 AS	#43B	Magellania venosa	ventral	middle	central	12.8474	0.207219	0.976708
	#43	43 BM A3 AS	#43B	Magellania venosa	ventral	middle	central	12.6191	0.258598	0.99319
	#43	43 BM A3 AS	#43B	Magellania venosa	ventral	middle	central	12.8545	0.298426	0.973704
	#43	43 BM A3 AS	#43B	Magellania venosa	ventral	middle	central	17.9366	0.293913	0.9879
	#43	MV43B 10	#43B	Magellania venosa	ventral	middle	central	13.1268	0.240865	0.968528
	#43	MV43B 11	#43B	Magellania venosa	ventral	middle	central	15.414	0.257299	0.985176
	#43	MV43B 8	#43B	Magellania venosa	ventral	middle	central	11.4473	0.421264	0.989629
	#43	MV43B 9	#43B	Magellania venosa	ventral	middle	central	14.3862	0.300825	1.00806
	#43	MV43A3 3	#43A3	Magellania venosa	ventral	external	posterior	5.93011	0.416438	0.970289
	#43	MV43A3 5	#43A3	Magellania venosa	ventral	external	posterior	9.84229	0.34244	0.980882
	#43	MV43A3 6	#43A3	Magellania venosa	ventral	external	posterior	7.80115	0.407402	0.97371
	#43	MV43A3 7	#43A3	Magellania venosa	ventral	external	posterior	9.73804	0.314193	0.968342
	#43	MV43B 3	#43B	Magellania venosa	ventral	external	posterior	20.7015	0.246386	0.993015
	#43	MV43B 5	#43B	Magellania venosa	ventral	external	posterior	17.4338	0.293536	0.983766
	#43	MV43B 6	#43B	Magellania venosa	ventral	external	posterior	21.7614	0.265812	0.990347
	#43	MV43A3 1	#43A3	Magellania venosa	ventral	middle	posterior	17.5212	0.27356	0.995053
	#43	MV43A3 2	#43A3	Magellania venosa	ventral	middle	posterior	10.72	0.571211	0.985329
	#43	MV43A3 2	#43A3	Magellania venosa	ventral	middle	posterior	12.404	0.358231	0.981367
	#43	MV43A3 9	#43A3	Magellania venosa	ventral	middle	posterior	12.2231	0.387177	0.988749
	#63	MV63D 10	#63D	Magellania venosa	dorsal	internal	anterior	13.4675	0.300168	0.987195
	#63	MV63D 16	#63D	Magellania venosa	dorsal	internal	anterior	13.6383	0.164598	0.972277
	#63	MV63D 8	#63D	Magellania venosa	dorsal	middle	anterior	15.2797	0.290246	0.979836
	#63	MV63D 4	#63D	Magellania venosa	dorsal	middle	central	21.7228	0.208967	0.993334
	#63	63 AAS BAS	#63A	Magellania venosa	ventral	external	anterior	4.90164	0.641853	0.975286
	#63	63 AAS BAS	#63A	Magellania venosa	ventral	external	anterior	5.56494	0.578137	0.980847
	#63	63 AAS BAS	#63A	Magellania venosa	ventral	external	anterior	4.71729	0.638185	0.975914
	#63	63 AAS BAS	#63A	Magellania venosa	ventral	external	anterior	7.36939	0.39698	0.985482
	#63	63 AAS BAS	#63A	Magellania venosa	ventral	external	anterior	6.62451	0.37115	0.980256
	#63	63 AAS BAS	#63A	Magellania venosa	ventral	external	anterior	5.5567	0.415514	0.980316
	#63	63 AM BA BM	#63A	Magellania venosa	ventral	external	anterior	4.30304	0.587825	0.986559
	#63	63 BAS2	#63B	Magellania venosa	ventral	external	anterior	11.2002	0.243587	0.984539
	#63	63 BM ASS	#63B	Magellania venosa	ventral	external	anterior	6.85913	0.315509	0.987609
	#63	63 BM ASS	#63B	Magellania venosa	ventral	external	anterior	5.31897	0.546416	0.982525
	#63	63 BM ASS	#63B	Magellania venosa	ventral	external	anterior	10.6099	0.285866	0.979874
	#63	63 AAS BAS	#63A	Magellania venosa	ventral	internal	anterior	15.9033	0.267822	0.989567
	#63	63 AM BA BM	#63A	Magellania venosa	ventral	internal	anterior	7.67627	0.407953	0.975092
	#63	63 AAS BAS	#63A	Magellania venosa	ventral	middle	anterior	10.9401	0.449114	0.981176
	#63	63 AAS BAS	#63A	Magellania venosa	ventral	middle	anterior	12.9237	0.204289	0.983719
	#63	63 AAS BAS	#63A	Magellania venosa	ventral	middle	anterior	18.1121	0.146022	0.981154
	#63	63 AAS BAS	#63A	Magellania venosa	ventral	middle	anterior	12.6006	0.287171	0.982191
	#63	63 AAS BAS	#63A	Magellania venosa	ventral	middle	anterior	10.3317	0.3856	0.988146
	#63	63 AAS BAS	#63A	Magellania venosa	ventral	middle	anterior	10.6272	0.43859	0.990106
	#63	63 AAS BAS	#63A	Magellania venosa	ventral	middle	anterior	9.72974	0.439354	0.990439
	#63	63 AAS BAS	#63A	Magellania venosa	ventral	middle	anterior	12.2255	0.312337	0.984593
	#63	63 AAS BAS	#63A	Magellania venosa	ventral	middle	anterior	10.6162	0.352509	0.979116
	#63	63 AAS BAS	#63A	Magellania venosa	ventral	middle	anterior	16.2113	0.307101	0.988215
	#63	63 AM BA BM	#63A	Magellania venosa	ventral	middle	anterior	6.10229	0.346498	0.963337
	#63	63 AM BA BM	#63A	Magellania venosa	ventral	middle	anterior	6.30176	0.334173	0.983477
	#63	MV63A 19	#63A	Magellania venosa	ventral	middle	anterior	13.6242	0.282674	0.971228
	#63	63 BAS2	#63B	Magellania venosa	ventral	middle	anterior	11.2765	0.356124	0.985305
	#63	63 BAS2	#63B	Magellania venosa	ventral	middle	anterior	8.17255	0.512721	0.993481
	#63	63 BAS2	#63B	Magellania venosa	ventral	middle	anterior	6.65661	0.497599	0.990692
	#63	63 BAS2	#63B	Magellania venosa	ventral	middle	anterior	13.6075	0.321168	0.991986
	#63	63 BAS2	#63B	Magellania venosa	ventral	middle	anterior	10.951	0.265102	0.989773
	#63	63 BAS2	#63B	Magellania venosa	ventral	middle	anterior	10.7311	0.351945	0.982439
	#63	63 BAS2	#63B	Magellania venosa	ventral	middle	anterior	11.9935	0.312868	0.983878
	#63	63 BAS2	#63B	Magellania venosa	ventral	middle	anterior	9.16565	0.292052	0.991583
	#63	63 BAS2	#63B	Magellania venosa	ventral	middle	anterior	9.46985	0.249449	0.995557
	#63	63 BM ASS	#63B	Magellania venosa	ventral	middle	anterior	11.3709	0.355481	0.974764
	#63	63 BM ASS	#63B	Magellania venosa	ventral	middle	anterior	12.5874	0.228183	0.988269
	#63	63 BM ASS	#63B	Magellania venosa	ventral	middle	anterior	9.29883	0.291588	0.973132
	#63	63 BM ASS	#63B	Magellania venosa	ventral	middle	anterior	10.603	0.388843	0.985107
	#63	63 BM ASS	#63B	Magellania venosa	ventral	middle	anterior	12.5913	0.295624	0.993039
	#63	63 BM ASS	#63B	Magellania venosa	ventral	middle	anterior	11.1222	0.289943	0.989024
	#63	63 BM ASS	#63B	Magellania venosa	ventral	middle	anterior	13.4224	0.225792	0.993245
	#63	MV63B 14	#63B	Magellania venosa	ventral	middle	anterior	13.106	0.250724	0.974389
	#63	63 AM BA BM	#63A	Magellania venosa	ventral	internal	central	19.502	0.236205	0.990399
	#63	63 BM ASS	#63B	Magellania venosa	ventral	internal	central	14.7583	0.414795	0.9983
	#63	MV63B 8	#63B	Magellania venosa	ventral	internal	central	13.5013	0.352554	0.986112
	#63	63 AM BA BM	#63A	Magellania venosa	ventral	middle	central	15.8407	0.260645	0.982053
	#63	63 AM BA BM	#63A	Magellania venosa	ventral	middle	central	18.8355	0.179768	0.991695
	#63	63 AM BA BM	#63A	Magellania venosa	ventral	middle	central	12.1199	0.259462	0.989884
	#63	63 AM BA BM	#63A	Magellania venosa	ventral	middle	central	13.2058	0.218735	1.0006
	#63	63 AM BA BM	#63A	Magellania venosa	ventral	middle	central	16.0177	0.215422	0.990599
	#63	63 AM BA BM	#63A	Magellania venosa	ventral	middle	central	14.4908	0.248212	0.980993
	#63	63 AM BA BM	#63A	Magellania venosa	ventral	middle	central	12.6844	0.299132	0.991522
	#63	63 AM BA BM	#63A	Magellania venosa	ventral	middle	central	14.6372	0.259699	0.99207
	#63	63 AM BA BM	#63A	Magellania venosa	ventral	middle	central	14.187	0.315702	0.991626
	#63	63 AM BA BM	#63A	Magellania venosa	ventral	middle	central	5.43805	0.518964	0.987655
	#63	MV63A 12	#63A	Magellania venosa	ventral	middle	central	15.3807	0.236109	0.981809
	#63	MV63A 12	#63A	Magellania venosa	ventral	middle	central	15.1107	0.227185	0.975021
	#63	MV63A 13	#63A	Magellania venosa	ventral	middle	central	15.1272	0.260289	0.965478
	#63	MV63A 14	#63A	Magellania venosa	ventral	middle	central	13.532	0.277731	0.984045
	#63	MV63A 15	#63A	Magellania venosa	ventral	middle	central	16.0513	0.26387	0.97434
	#63	63 BM ASS	#63B	Magellania venosa	ventral	middle	central	16.2602	0.274828	0.990387
	#63	63 BM ASS	#63B	Magellania venosa	ventral	middle	central	12.7607	0.312411	0.990125
	#63	63 BM ASS	#63B	Magellania venosa	ventral	middle	central	15.0042	0.318815	0.968116
	#63	63 BM ASS	#63B	Magellania venosa	ventral	middle	central	13.4996	0.201828	0.990768
	#63	63 BM ASS	#63B	Magellania venosa	ventral	middle	central	10.9972	0.22493	0.99074
	#63	63 BM ASS	#63B	Magellania venosa	ventral	middle	central	12.2067	0.335395	0.977407
	#63	63 BM ASS	#63B	Magellania venosa	ventral	middle	central	16.3515	0.26957	0.979211
	#63	63 BM ASS	#63B	Magellania venosa	ventral	middle	central	16.1237	0.233685	0.986153
	#63	MV63B 12	#63B	Magellania venosa	ventral	middle	central	12.0005	0.308013	0.974107
	#63	MV63B 13	#63B	Magellania venosa	ventral	middle	central	12.4973	0.254838	0.944511
	#63	MV63B 6	#63B	Magellania venosa	ventral	middle	central	13.3235	0.270456	0.980354
	#63	MV63B 9	#63B	Magellania venosa	ventral	middle	central	10.8246	0.326066	0.952332
	#63	MV63A 4	#63A	Magellania venosa	ventral	external	posterior	20.9936	0.237105	0.989282
	#63	MV63A 5	#63A	Magellania venosa	ventral	external	posterior	24.782	0.208471	0.983032
	#63	MV63A 6	#63A	Magellania venosa	ventral	external	posterior	18.7111	0.228365	0.973148
	#63	MV63A 7	#63A	Magellania venosa	ventral	external	posterior	17.5057	0.292034	0.973905
	#63	MV63A 8	#63A	Magellania venosa	ventral	external	posterior	19.0538	0.171872	0.98064
	#63	MV63B 1	#63B	Magellania venosa	ventral	external	posterior	14.0389	0.274267	0.981953
	#63	MV63B 3	#63B	Magellania venosa	ventral	external	posterior	23.6034	0.215868	0.983304
	#63	MV63A 9	#63A	Magellania venosa	ventral	middle	posterior	16.3373	0.317278	0.98741
	#8005	8005DA 59	#8005DA	Magellania venosa	dorsal	internal	anterior	13.5447	0.185044	0.995622
	#8005	8005DA 40	#8005DA	Magellania venosa	dorsal	middle	anterior	10.6303	0.280927	0.969555
	#8005	8005DA 40	#8005DA	Magellania venosa	dorsal	middle	anterior	12.6055	0.253718	0.976018
	#8005	8005DA 41	#8005DA	Magellania venosa	dorsal	middle	anterior	14.3987	0.182818	0.981392
	#8005	8005DA 42	#8005DA	Magellania venosa	dorsal	middle	anterior	11.1621	0.279977	0.973358
	#8005	8005DA 42	#8005DA	Magellania venosa	dorsal	middle	anterior	11.0749	0.333522	0.97621
	#8005	8005DA 44	#8005DA	Magellania venosa	dorsal	middle	anterior	12.7396	0.212966	1.0242
	#8005	8005DA 50	#8005DA	Magellania venosa	dorsal	middle	anterior	10.3635	0.236754	0.965075
	#8005	8005DA 51	#8005DA	Magellania venosa	dorsal	middle	anterior	13.0419	0.184754	0.978641
	#8005	8005DA 56	#8005DA	Magellania venosa	dorsal	middle	anterior	11.2982	0.268379	0.984341
	#8005	8005DA 60	#8005DA	Magellania venosa	dorsal	middle	anterior	10.0018	0.198988	0.982164
	#8005	8005DA 18	#8005DA	Magellania venosa	dorsal	external	central	11.7707	0.284149	0.977155
	#8005	8005DC 04	#8005DC	Magellania venosa	dorsal	external	central	7.677	0.26102	0.983713
	#8005	8005DA 16	#8005DA	Magellania venosa	dorsal	middle	central	13.3333	0.288215	0.993143
	#8005	8005DA 16	#8005DA	Magellania venosa	dorsal	middle	central	15.0436	0.228844	0.972266
	#8005	8005DA 20	#8005DA	Magellania venosa	dorsal	middle	central	12.4779	0.243228	0.97461
	#8005	8005DA 20	#8005DA	Magellania venosa	dorsal	middle	central	13.3695	0.209946	0.986834
	#8005	8005DA 21	#8005DA	Magellania venosa	dorsal	middle	central	11.2684	0.272528	0.983118
	#8005	8005DA 21	#8005DA	Magellania venosa	dorsal	middle	central	11.6023	0.222271	0.979932
	#8005	8005DA 22	#8005DA	Magellania venosa	dorsal	middle	central	12.2872	0.222921	0.977623
	#8005	8005DA 22	#8005DA	Magellania venosa	dorsal	middle	central	13.4348	0.201256	0.977087
	#8005	8005DA 22	#8005DA	Magellania venosa	dorsal	middle	central	13.8594	0.162472	0.984993
	#8005	8005DA 30	#8005DA	Magellania venosa	dorsal	middle	central	12.2714	0.265528	0.987966
	#8005	8005DA 30	#8005DA	Magellania venosa	dorsal	middle	central	14.8882	0.24213	0.988848
	#8005	8005DA 32	#8005DA	Magellania venosa	dorsal	middle	central	13.4904	0.172158	0.977311
	#8005	8005DA 32	#8005DA	Magellania venosa	dorsal	middle	central	13.0227	0.185333	0.97892
	#8005	8005DA 33	#8005DA	Magellania venosa	dorsal	middle	central	11.9724	0.264285	0.968919
	#8005	8005DA 36	#8005DA	Magellania venosa	dorsal	middle	central	11.9338	0.222983	0.968077
	#8005	8005DC 06	#8005DC	Magellania venosa	dorsal	middle	central	15.8874	0.373967	0.9783
	#8005	8005DC 07	#8005DC	Magellania venosa	dorsal	middle	central	14.5404	0.305795	0.984121
	#8005	8005DC 10	#8005DC	Magellania venosa	dorsal	middle	central	10.4669	0.319191	0.968428
	#8005	8005DC 14	#8005DC	Magellania venosa	dorsal	middle	central	11.5026	0.28545	0.990389
	#8005	8005DC 16	#8005DC	Magellania venosa	dorsal	middle	central	10.7899	0.346564	0.974777
	#8005	8005DC 19	#8005DC	Magellania venosa	dorsal	middle	central	9.99091	0.278785	0.971177
	#8005	8005DA 08	#8005DA	Magellania venosa	dorsal	external	posterior	8.98356	0.155088	0.989654
	#8005	8005DB 07	#8005DB	Magellania venosa	dorsal	external	posterior	4.85144	0.328144	0.980858
	#8005	8005DB 09	#8005DB	Magellania venosa	dorsal	external	posterior	7.55485	0.403409	0.987779
	#8005	8005DB 09	#8005DB	Magellania venosa	dorsal	external	posterior	7.12118	0.416308	0.972521
	#8005	8005DB 17	#8005DB	Magellania venosa	dorsal	internal	posterior	18.6915	0.374532	0.988173
	#8005	8005DA 09	#8005DA	Magellania venosa	dorsal	middle	posterior	13.5775	0.232009	0.979786
	#8005	8005DA 10	#8005DA	Magellania venosa	dorsal	middle	posterior	15.1687	0.210271	0.988574
	#8005	8005DA 11	#8005DA	Magellania venosa	dorsal	middle	posterior	14.7278	0.28587	0.989634
	#8005	8005DA 11	#8005DA	Magellania venosa	dorsal	middle	posterior	13.323	0.280921	0.990404
	#8005	8005DA 15	#8005DA	Magellania venosa	dorsal	middle	posterior	14.5933	0.222049	0.993924
	#8005	8005DA 15	#8005DA	Magellania venosa	dorsal	middle	posterior	15.0009	0.18084	0.988135
	#8005	8005DB 12	#8005DB	Magellania venosa	dorsal	middle	posterior	16.6954	0.293195	0.980664
	#8005	8005DB 13	#8005DB	Magellania venosa	dorsal	middle	posterior	14.4632	0.344443	0.986491
	#8005	8005DB 15	#8005DB	Magellania venosa	dorsal	middle	posterior	15.0615	0.322623	0.989531
	#8005	8005DB 19	#8005DB	Magellania venosa	dorsal	middle	posterior	14.7106	0.298924	0.992829
	#8005	8005DB 19	#8005DB	Magellania venosa	dorsal	middle	posterior	12.7267	0.370509	0.984974
	#8005	8005DB 20	#8005DB	Magellania venosa	dorsal	middle	posterior	15.2092	0.238742	0.977179
	#8005	8005DB 21	#8005DB	Magellania venosa	dorsal	middle	posterior	13.0801	0.229087	0.959084
	#8005	8005VA 35	#8005VA	Magellania venosa	ventral	internal	anterior	12.7951	0.169544	0.967056
	#8005	8005VA 35	#8005VA	Magellania venosa	ventral	internal	anterior	11.2791	0.179375	0.968492
	#8005	8005VA 39	#8005VA	Magellania venosa	ventral	internal	anterior	15.2914	0.18427	0.983692
	#8005	8005VA 40	#8005VA	Magellania venosa	ventral	internal	anterior	11.6128	0.18241	0.980014
	#8005	8005VA 32	#8005VA	Magellania venosa	ventral	middle	anterior	12.4167	0.204585	0.98524
	#8005	8005VA 36	#8005VA	Magellania venosa	ventral	middle	anterior	12.343	0.241797	0.974648
	#8005	8005VA 37	#8005VA	Magellania venosa	ventral	middle	anterior	10.179	0.259146	0.977777
	#8005	8005VA 13	#8005VA	Magellania venosa	ventral	middle	central	10.645	0.269266	0.981547
	#8005	8005VA 14	#8005VA	Magellania venosa	ventral	middle	central	11.015	0.189432	0.988137
	#8005	8005VA 14	#8005VA	Magellania venosa	ventral	middle	central	11.4959	0.208357	0.988772
	#8005	8005VA 16	#8005VA	Magellania venosa	ventral	middle	central	10.7375	0.241077	0.941916
	#8005	8005VA 16	#8005VA	Magellania venosa	ventral	middle	central	11.4454	0.252569	0.969275
	#8005	8005VA 16	#8005VA	Magellania venosa	ventral	middle	central	10.6498	0.231983	0.983954
	#8005	8005VA 17	#8005VA	Magellania venosa	ventral	middle	central	11.559	0.23278	0.982824
	#8005	8005VA 17	#8005VA	Magellania venosa	ventral	middle	central	9.62804	0.295151	0.984354
	#8005	8005VA 17	#8005VA	Magellania venosa	ventral	middle	central	10.7658	0.260284	0.975064
	#8005	8005VC 04	#8005VC	Magellania venosa	ventral	middle	central	11.236	0.221617	0.996857
	#8005	8005VC 08	#8005VC	Magellania venosa	ventral	middle	central	11.6574	0.253102	1.00057
	#8005	8005VC 13	#8005VC	Magellania venosa	ventral	middle	central	14.2978	0.21657	0.985227
	#8005	8005VC 14	#8005VC	Magellania venosa	ventral	middle	central	14.6077	0.273077	0.986248
	#8005	8005VC 15	#8005VC	Magellania venosa	ventral	middle	central	15.1258	0.210093	0.986582
	#8005	8005VC 16	#8005VC	Magellania venosa	ventral	middle	central	10.295	0.258075	0.979608
	#8005	8005VA 03	#8005VA	Magellania venosa	ventral	external	posterior	13.0415	0.222328	0.976971
	#8005	8005VA 03	#8005VA	Magellania venosa	ventral	external	posterior	14.9718	0.196294	0.974989
	#8005	8005VB 07	#8005VB	Magellania venosa	ventral	external	posterior	5.95425	0.393162	0.976767
	#8005	8005VB 10	#8005VB	Magellania venosa	ventral	external	posterior	6.43042	0.445954	0.97418
	#8005	8005VB 12	#8005VB	Magellania venosa	ventral	external	posterior	5.11578	0.38748	0.982541
	#8005	8005VB 13	#8005VB	Magellania venosa	ventral	external	posterior	5.16211	0.312246	0.993556
	#8005	8005VB 25	#8005VB	Magellania venosa	ventral	internal	posterior	19.8972	0.414947	1.00002
	#8005	8005VA 05	#8005VA	Magellania venosa	ventral	middle	posterior	16.5169	0.177175	0.980577
	#8005	8005VA 06	#8005VA	Magellania venosa	ventral	middle	posterior	16.3356	0.146368	0.983962
	#8005	8005VA 07	#8005VA	Magellania venosa	ventral	middle	posterior	13.236	0.294584	0.985588
	#8005	8005VA 07	#8005VA	Magellania venosa	ventral	middle	posterior	12.9342	0.255343	0.989883
	#8005	8005VA 08	#8005VA	Magellania venosa	ventral	middle	posterior	11.6348	0.320147	0.980752
	#8005	8005VA 08	#8005VA	Magellania venosa	ventral	middle	posterior	11.5564	0.338831	0.987873
	#8005	8005VA 09	#8005VA	Magellania venosa	ventral	middle	posterior	14.5544	0.257756	0.984391
	#8005	8005VA 10	#8005VA	Magellania venosa	ventral	middle	posterior	11.5852	0.346459	0.981963
	#8005	8005VB 04	#8005VB	Magellania venosa	ventral	middle	posterior	12.4227	0.42123	0.977703
	#8005	8005VB 04	#8005VB	Magellania venosa	ventral	middle	posterior	11.8477	0.388763	0.975662
	#8005	8005VB 05	#8005VB	Magellania venosa	ventral	middle	posterior	11.4305	0.334006	0.980411
	#8005	8005VB 17	#8005VB	Magellania venosa	ventral	middle	posterior	13.2052	0.31127	0.983113
	#9006	9006DA 39	#9006DA	Magellania venosa	dorsal	internal	anterior	13.6482	0.195638	0.98136
	#9006	9006DA 42	#9006DA	Magellania venosa	dorsal	internal	anterior	14.0404	0.218378	0.985559
	#9006	9006DA 43	#9006DA	Magellania venosa	dorsal	internal	anterior	14.4217	0.154529	0.979052
	#9006	9006DA 37	#9006DA	Magellania venosa	dorsal	middle	anterior	13.5238	0.252652	0.984364
	#9006	9006DA 47	#9006DA	Magellania venosa	dorsal	middle	anterior	11.7535	0.19584	0.982482
	#9006	9006DC 08	#9006DC	Magellania venosa	dorsal	internal	central	13.5398	0.177333	0.988344
	#9006	9006DC 09	#9006DC	Magellania venosa	dorsal	internal	central	12.6642	0.195091	0.976104
	#9006	9006DC 23	#9006DC	Magellania venosa	dorsal	internal	central	15.2927	0.183605	0.980901
	#9006	9006DA 09	#9006DA	Magellania venosa	dorsal	middle	central	12.379	0.277458	0.982683
	#9006	9006DA 10	#9006DA	Magellania venosa	dorsal	middle	central	12.1604	0.251382	0.977504
	#9006	9006DA 11	#9006DA	Magellania venosa	dorsal	middle	central	11.1536	0.246403	0.981996
	#9006	9006DA 12	#9006DA	Magellania venosa	dorsal	middle	central	11.6448	0.267461	0.978853
	#9006	9006DA 12	#9006DA	Magellania venosa	dorsal	middle	central	12.4639	0.19485	0.9793
	#9006	9006DA 15	#9006DA	Magellania venosa	dorsal	middle	central	9.45044	0.329422	0.977539
	#9006	9006DA 15	#9006DA	Magellania venosa	dorsal	middle	central	10.3265	0.304261	0.986866
	#9006	9006DA 18	#9006DA	Magellania venosa	dorsal	middle	central	10.6285	0.335734	0.982708
	#9006	9006DA 23	#9006DA	Magellania venosa	dorsal	middle	central	8.43658	0.324178	0.980116
	#9006	9006DA 23	#9006DA	Magellania venosa	dorsal	middle	central	10.9145	0.260888	0.96731
	#9006	9006DC 06	#9006DC	Magellania venosa	dorsal	middle	central	11.5709	0.248808	0.987705
	#9006	9006DC 12	#9006DC	Magellania venosa	dorsal	middle	central	10.7605	0.294501	0.993049
	#9006	9006DC 13	#9006DC	Magellania venosa	dorsal	middle	central	12.5664	0.310277	0.990991
	#9006	9006DC 13	#9006DC	Magellania venosa	dorsal	middle	central	14.4543	0.277143	1.00053
	#9006	9006DC 14	#9006DC	Magellania venosa	dorsal	middle	central	10.8525	0.3157	0.989659
	#9006	9006DC 20	#9006DC	Magellania venosa	dorsal	middle	central	12.4484	0.242423	0.978019
	#9006	9006DC 21	#9006DC	Magellania venosa	dorsal	middle	central	13.4796	0.242353	0.993803
	#9006	9006DB 02	#9006DB	Magellania venosa	dorsal	external	posterior	5.09185	0.44489	0.986714
	#9006	9006DB 02	#9006DB	Magellania venosa	dorsal	external	posterior	6.23909	0.499767	0.974538
	#9006	9006DB 05	#9006DB	Magellania venosa	dorsal	external	posterior	5.87126	0.395581	0.978184
	#9006	9006DB 08	#9006DB	Magellania venosa	dorsal	external	posterior	5.56146	0.359316	1.0131
	#9006	9006DB 09	#9006DB	Magellania venosa	dorsal	internal	posterior	19.0022	0.27693	0.99697
	#9006	9006DB 10	#9006DB	Magellania venosa	dorsal	internal	posterior	20.1494	0.26119	0.98091
	#9006	9006DA 06	#9006DA	Magellania venosa	dorsal	middle	posterior	14.5593	0.215131	0.987461
	#9006	9006DA 07	#9006DA	Magellania venosa	dorsal	middle	posterior	15.9252	0.173779	1.00065
	#9006	9006DB 11	#9006DB	Magellania venosa	dorsal	middle	posterior	12.594	0.306591	0.983689
	#9006	9006DB 13	#9006DB	Magellania venosa	dorsal	middle	posterior	16.6618	0.24699	0.995487
	#9006	9006DB 13	#9006DB	Magellania venosa	dorsal	middle	posterior	17.4798	0.228654	0.991235
	#9006	9006DB 15	#9006DB	Magellania venosa	dorsal	middle	posterior	12.5103	0.18969	0.986678
	#9006	9006VA 38	#9006VA	Magellania venosa	ventral	middle	anterior	10.7474	0.305806	0.988065
	#9006	9006VA 40	#9006VA	Magellania venosa	ventral	middle	anterior	9.72339	0.265801	0.982944
	#9006	9006VC 09	#9006VC	Magellania venosa	ventral	external	central	4.9852	0.401983	0.985258
	#9006	9006VC 09	#9006VC	Magellania venosa	ventral	external	central	5.73611	0.32174	0.978298
	#9006	9006VC 13	#9006VC	Magellania venosa	ventral	external	central	7.95813	0.230711	0.974329
	#9006	9006VC 14	#9006VC	Magellania venosa	ventral	external	central	6.56909	0.366759	0.983236
	#9006	9006VC 14	#9006VC	Magellania venosa	ventral	external	central	6.72144	0.502025	0.992167
	#9006	9006VC 14	#9006VC	Magellania venosa	ventral	external	central	6.93216	0.444878	0.990758
	#9006	9006VC 16	#9006VC	Magellania venosa	ventral	external	central	5.04932	0.341691	0.979635
	#9006	9006VA 22	#9006VA	Magellania venosa	ventral	internal	central	26.5656	0.187016	0.987043
	#9006	9006VA 23	#9006VA	Magellania venosa	ventral	internal	central	17.4072	0.262598	0.971554
	#9006	9006VC 07	#9006VC	Magellania venosa	ventral	internal	central	18.7313	0.280924	0.991857
	#9006	9006VC 10	#9006VC	Magellania venosa	ventral	internal	central	18.8809	0.263716	0.995744
	#9006	9006VC 23	#9006VC	Magellania venosa	ventral	internal	central	12.6526	0.21868	0.987222
	#9006	9006VA 17	#9006VA	Magellania venosa	ventral	middle	central	11.3569	0.296481	0.977653
	#9006	9006VA 18	#9006VA	Magellania venosa	ventral	middle	central	12.9362	0.274757	0.976599
	#9006	9006VA 19	#9006VA	Magellania venosa	ventral	middle	central	10.9164	0.224863	0.992526
	#9006	9006VA 19	#9006VA	Magellania venosa	ventral	middle	central	11.069	0.223354	0.98383
	#9006	9006VC 05	#9006VC	Magellania venosa	ventral	middle	central	8.67761	0.368966	0.980259
	#9006	9006VC 06	#9006VC	Magellania venosa	ventral	middle	central	11.8814	0.356644	0.988242
	#9006	9006VC 11	#9006VC	Magellania venosa	ventral	middle	central	11.6566	0.257223	0.987379
	#9006	9006VC 21	#9006VC	Magellania venosa	ventral	middle	central	12.1892	0.281028	0.981923
	#9006	9006VC 22	#9006VC	Magellania venosa	ventral	middle	central	15.2363	0.224605	0.980844
	#9006	9006VA 03	#9006VA	Magellania venosa	ventral	external	posterior	11.4141	0.365702	0.980703
	#9006	9006VB 04	#9006VB	Magellania venosa	ventral	external	posterior	5.60852	0.283361	0.987041
	#9006	9006VB 05	#9006VB	Magellania venosa	ventral	external	posterior	8.63782	0.274116	0.999359
	#9006	9006VB 06	#9006VB	Magellania venosa	ventral	external	posterior	6.24744	0.369985	0.981788
	#9006	9006VB 12	#9006VB	Magellania venosa	ventral	external	posterior	5.23218	0.231657	0.980485
	#9006	9006VB 13	#9006VB	Magellania venosa	ventral	external	posterior	4.58787	0.290712	0.992315
	#9006	9006VB 09	#9006VB	Magellania venosa	ventral	internal	posterior	15.8117	0.31843	0.98677
	#9006	9006VB 15	#9006VB	Magellania venosa	ventral	internal	posterior	14.7698	0.318148	0.982614
	#9006	9006VA 08	#9006VA	Magellania venosa	ventral	middle	posterior	21.2988	0.220177	0.979576
	#9006	9006VA 09	#9006VA	Magellania venosa	ventral	middle	posterior	19.0215	0.205352	0.985993
	#9006	9006VA 10	#9006VA	Magellania venosa	ventral	middle	posterior	14.4289	0.278928	0.981564
	#9006	9006VA 12	#9006VA	Magellania venosa	ventral	middle	posterior	11.5024	0.368329	0.973359
	#9006	9006VA 12	#9006VA	Magellania venosa	ventral	middle	posterior	12.2643	0.361464	0.969704
	#9006	9006VB 10	#9006VB	Magellania venosa	ventral	middle	posterior	17.271	0.351739	0.981715
	#9006	9006VB 11	#9006VB	Magellania venosa	ventral	middle	posterior	15.9305	0.319586	0.992167
	#9006	9006VB 14	#9006VB	Magellania venosa	ventral	middle	posterior	14.248	0.257188	0.993577
	#9006	9006VB 16	#9006VB	Magellania venosa	ventral	middle	posterior	13.0195	0.343483	0.986832
	#9006	9006VB 20	#9006VB	Magellania venosa	ventral	middle	posterior	16.0809	0.288003	0.980369
	Outliers are marked in red colour, outliers were identified according to the Tukey's fences (Tukey, 1977), which fall outside of the fences F1 and F2 [F1=Q1-1.5IQR; F2=Q3+1.5IQR; Q1/Q3=first/third quartiles; IQR(interquartile range)=Q3-Q1].

## Sheet: measurement on anterior part
No.	No. of specimen	No. of SEM	Species	Valve	Position	Width (μm)	Boundary between fibres
	#158	158 a e	Magellania venosa	ventral	Z1-1	3.95005
	#158	158 a e	Magellania venosa	ventral	Z1-1	2.16874
	#158	158 a e	Magellania venosa	ventral	Z1-1	3.37581
	#158	158 a e	Magellania venosa	ventral	Z1-1	3.43989
	#158	158 a e	Magellania venosa	ventral	Z1-1	3.40723
	#158	158 a e	Magellania venosa	ventral	Z1-1	2.94104
	#158	158 a e	Magellania venosa	ventral	Z1-1	3.7016
	#158	158 a e	Magellania venosa	ventral	Z1-1	2.65463
	#158	158 a e	Magellania venosa	ventral	Z1-1	2.83447
	#158	158 a e	Magellania venosa	ventral	Z1-1	2.65462
	#158	158 a e	Magellania venosa	ventral	Z1-1	2.95479
	#158	158 a e	Magellania venosa	ventral	Z1-1	2.64331
	#158	158 a e	Magellania venosa	ventral	Z1-1	2.17898
	#158	158 a e	Magellania venosa	ventral	Z1-1	2.84436
	#158	158 a e	Magellania venosa	ventral	Z1-1	3.04541
	#158	158 a e	Magellania venosa	ventral	Z1-1	2.65466
	#158	158 a e	Magellania venosa	ventral	Z1-1	2.67433
	#158	158 a se	Magellania venosa	ventral	Z1-2	2.81509
	#158	158 a se	Magellania venosa	ventral	Z1-2	3.8429
	#158	158 a se	Magellania venosa	ventral	Z1-2	3.8694
	#158	158 a se	Magellania venosa	ventral	Z1-2	2.4959
	#158	158 a se	Magellania venosa	ventral	Z1-2	2.5251
	#158	158 a se	Magellania venosa	ventral	Z1-2	3.64856
	#158	158 a se	Magellania venosa	ventral	Z1-2	3.11002
	#158	158 a se	Magellania venosa	ventral	Z1-2	2.0405
	#158	158 a se	Magellania venosa	ventral	Z1-2	3.13439
	#158	158 a se	Magellania venosa	ventral	Z1-2	3.35682
	#158	158 a se	Magellania venosa	ventral	Z1-2	3.16968
	#158	158 a se	Magellania venosa	ventral	Z1-2	2.59497
	#158	158 a se	Magellania venosa	ventral	Z1-2	2.95479
	#158	158 a se	Magellania venosa	ventral	Z1-2	2.25835
	#158	158 sa e	Magellania venosa	ventral	Z2-1	3.76874
	#158	158 sa e	Magellania venosa	ventral	Z2-1	4.08738
	#158	158 sa e	Magellania venosa	ventral	Z2-1	2.4762
	#158	158 sa e	Magellania venosa	ventral	Z2-1	2.94489
	#158	158 sa e	Magellania venosa	ventral	Z2-1	5.85684
	#158	158 sa e	Magellania venosa	ventral	Z2-1	3.15584
	#158	158 sa e	Magellania venosa	ventral	Z2-1	3.25641
	#158	158 sa e	Magellania venosa	ventral	Z2-1	4.07022
	#158	158 sa e	Magellania venosa	ventral	Z2-1	3.7688
	#158	158 sa e	Magellania venosa	ventral	Z2-1	6.14253
	#158	158 sa e	Magellania venosa	ventral	Z2-1	3.64197
	#158	158 sa e	Magellania venosa	ventral	Z2-1	4.99179
	#158	158 sa e	Magellania venosa	ventral	Z2-1	4.18072
	#158	158 sa e	Magellania venosa	ventral	Z2-1	3.96631
	#158	158 sa e	Magellania venosa	ventral	Z2-1	4.62271
	#158	158 sa e	Magellania venosa	ventral	Z2-1	4.60519
	#158	158 sa e	Magellania venosa	ventral	Z2-1	4.11169
	#158	158 sa e	Magellania venosa	ventral	Z2-1	5.05589
	#158	158 sa e	Magellania venosa	ventral	Z2-1	4.31494
	#158	158 sa e	Magellania venosa	ventral	Z2-1	3.09638
	#158	158 sa e	Magellania venosa	ventral	Z2-1	5.2946
	#158	158 sa e	Magellania venosa	ventral	Z2-1	4.42654
	#158	158 sa e	Magellania venosa	ventral	Z2-1	3.48663
	#158	158 sa e	Magellania venosa	ventral	Z2-1	4.65518
	#158	158 sa e	Magellania venosa	ventral	Z2-1	3.70444
	#158	158 sa se	Magellania venosa	ventral	Z2-2	7.08771
	#158	158 sa se	Magellania venosa	ventral	Z2-2	5.2106
	#158	158 sa se	Magellania venosa	ventral	Z2-2	4.98859
	#158	158 sa se	Magellania venosa	ventral	Z2-2	4.29666
	#158	158 sa se	Magellania venosa	ventral	Z2-2	4.42836
	#158	158 sa se	Magellania venosa	ventral	Z2-2	4.85687
	#158	158 sa se	Magellania venosa	ventral	Z2-2	3.96631
	#158	158 sa se	Magellania venosa	ventral	Z2-2	4.4176
	#158	158 sa se	Magellania venosa	ventral	Z2-2	4.41766
	#158	158 sa se	Magellania venosa	ventral	Z2-2	5.09088
	#158	158 sa se	Magellania venosa	ventral	Z2-2	5.19298
	#158	158 sa se	Magellania venosa	ventral	Z2-2	3.75415
	#158	158 sa se	Magellania venosa	ventral	Z2-2	5.04321
	#158	158 sa se	Magellania venosa	ventral	Z2-2	5.05051
	#158	158 sa se	Magellania venosa	ventral	Z2-2	4.76282
	#158	158 sa se	Magellania venosa	ventral	Z2-2	4.53803
	#158	158 sa se	Magellania venosa	ventral	Z2-2	4.06298
	#158	158 sa se	Magellania venosa	ventral	Z2-2	5.2821
	#158	158 sa se	Magellania venosa	ventral	Z2-2	6.13411
	#223	223 a e	Magellania venosa	ventral	Z1-1	2.10118
	#223	223 a e	Magellania venosa	ventral	Z1-1	2.15927
	#223	223 a e	Magellania venosa	ventral	Z1-1	2.73395
	#223	223 a e	Magellania venosa	ventral	Z1-1	4.52195
	#223	223 a e	Magellania venosa	ventral	Z1-1	3.83829
	#223	223 a e	Magellania venosa	ventral	Z1-1	2.17899
	#223	223 a e	Magellania venosa	ventral	Z1-1	3.16968
	#223	223 a e	Magellania venosa	ventral	Z1-1	2.44227
	#223	223 a e	Magellania venosa	ventral	Z1-1	2.62177
	#223	223 a e	Magellania venosa	ventral	Z1-1	4.02496
	#223	223 a e	Magellania venosa	ventral	Z1-1	2.03028
	#223	223 a e	Magellania venosa	ventral	Z1-1	4.06055
	#223	223 a se	Magellania venosa	ventral	Z1-2	4.28985
	#223	223 a se	Magellania venosa	ventral	Z1-2	3.45013
	#223	223 a se	Magellania venosa	ventral	Z1-2	3.23657
	#223	223 a se	Magellania venosa	ventral	Z1-2	2.55443
	#223	223 a se	Magellania venosa	ventral	Z1-2	4.73334
	#223	223 a se	Magellania venosa	ventral	Z1-2	4.14627
	#223	223 a se	Magellania venosa	ventral	Z1-2	4.14142
	#223	223 a se	Magellania venosa	ventral	Z1-2	3.35688
	#223	223 a se	Magellania venosa	ventral	Z1-2	2.95477
	#223	223 a se	Magellania venosa	ventral	Z1-2	3.90257
	#223	223 a se	Magellania venosa	ventral	Z1-2	3.54804
	#223	223 sa e	Magellania venosa	ventral	Z2-1	2.99985
	#223	223 sa e	Magellania venosa	ventral	Z2-1	3.57968
	#223	223 sa e	Magellania venosa	ventral	Z2-1	4.28563
	#223	223 sa e	Magellania venosa	ventral	Z2-1	4.56691
	#223	223 sa e	Magellania venosa	ventral	Z2-1	3.68475
	#223	223 sa e	Magellania venosa	ventral	Z2-1	4.15118
	#223	223 sa e	Magellania venosa	ventral	Z2-1	3.74908
	#223	223 sa e	Magellania venosa	ventral	Z2-1	2.84441
	#223	223 sa e	Magellania venosa	ventral	Z2-1	2.16873
	#223	223 sa e	Magellania venosa	ventral	Z2-1	4.57581
	#223	223 sa e	Magellania venosa	ventral	Z2-1	2.37712
	#223	223 sa e	Magellania venosa	ventral	Z2-1	4.47255
	#223	223 sa e	Magellania venosa	ventral	Z2-1	4.2814
	#223	223 sa e	Magellania venosa	ventral	Z2-1	3.86941
	#223	223 sa e	Magellania venosa	ventral	Z2-1	4.85484
	#223	223 sa e	Magellania venosa	ventral	Z2-1	4.19978
	#223	223 sa e	Magellania venosa	ventral	Z2-1	5.07116
	#223	223 sa e	Magellania venosa	ventral	Z2-1	3.7838
	#223	223 sa e	Magellania venosa	ventral	Z2-1	4.15316
	#223	223 sa e	Magellania venosa	ventral	Z2-1	3.20856
	#223	223 sa e	Magellania venosa	ventral	Z2-1	3.57968
	#223	223 sa e	Magellania venosa	ventral	Z2-1	3.05531
	#223	223 sa e	Magellania venosa	ventral	Z2-1	3.03775
	#223	223 sa e	Magellania venosa	ventral	Z2-1	3.35706
	#223	223 sa e	Magellania venosa	ventral	Z2-1	5.02087
	#223	223 sa e	Magellania venosa	ventral	Z2-1	4.38508
	#223	223 sa e	Magellania venosa	ventral	Z2-1	3.01096
	#223	223 sa e	Magellania venosa	ventral	Z2-1	3.77299
	#223	223 sa e	Magellania venosa	ventral	Z2-1	3.84296
	#223	223 sa e	Magellania venosa	ventral	Z2-1	3.46728
	#223	223 sa e	Magellania venosa	ventral	Z2-1	2.68092
	#223	223 sa se	Magellania venosa	ventral	Z2-2	5.14685
	#223	223 sa se	Magellania venosa	ventral	Z2-2	5.06579
	#223	223 sa se	Magellania venosa	ventral	Z2-2	5.10883
	#223	223 sa se	Magellania venosa	ventral	Z2-2	3.83164
	#223	223 sa se	Magellania venosa	ventral	Z2-2	5.22989
	#223	223 sa se	Magellania venosa	ventral	Z2-2	6.80788
	#223	223 sa se	Magellania venosa	ventral	Z2-2	5.90958
	#223	223 sa se	Magellania venosa	ventral	Z2-2	5.76464
	#223	223 sa se	Magellania venosa	ventral	Z2-2	5.99944
	#223	223 sa se	Magellania venosa	ventral	Z2-2	5.57113
	#223	223 sa se	Magellania venosa	ventral	Z2-2	3.02425
	#223	223 sa se	Magellania venosa	ventral	Z2-2	3.99564
	#223	223 sa se	Magellania venosa	ventral	Z2-2	5.77936
	#223	223 sa se	Magellania venosa	ventral	Z2-2	4.85689
	#223	223 sa se	Magellania venosa	ventral	Z2-2	4.66357
	#223	223 sa se	Magellania venosa	ventral	Z2-2	4.57584
	#223	223 sa se	Magellania venosa	ventral	Z2-2	5.56653
	#223	223 sa se	Magellania venosa	ventral	Z2-2	4.98859
	#223	223 sa se	Magellania venosa	ventral	Z2-2	4.06299
	#223	223 sa se	Magellania venosa	ventral	Z2-2	3.8429
	#223	223 sa se	Magellania venosa	ventral	Z2-2	4.81887
	#223	223 sa se	Magellania venosa	ventral	Z2-2	3.64855
	#223	223 sa se	Magellania venosa	ventral	Z2-2	4.24838
	#223	223 sa se	Magellania venosa	ventral	Z2-2	3.26875
	#223	223 sa se	Magellania venosa	ventral	Z2-2	4.57306
	#223	223 sa se	Magellania venosa	ventral	Z2-2	4.18896
	#223	223 sa se	Magellania venosa	ventral	Z2-2	4.21948
	#223	223 sa se	Magellania venosa	ventral	Z2-2	3.0553
	#223	223 sa se	Magellania venosa	ventral	Z2-2	4.20692
	#223	223 sa se	Magellania venosa	ventral	Z2-2	4.12604
	#223	223 sa se	Magellania venosa	ventral	Z2-2	3.86938
	#223	223 sa se	Magellania venosa	ventral	Z2-2	5.05022
	#223	223 sa se	Magellania venosa	ventral	Z2-2	4.68349
	#223	223 sa se	Magellania venosa	ventral	Z2-2	4.5364
	#223	223 sa se	Magellania venosa	ventral	Z2-2	3.88287
	#223	223 sa se	Magellania venosa	ventral	Z2-2	3.34699
	#43	43 a e	Magellania venosa	ventral	Z1-1	4.99182
	#43	43 a e	Magellania venosa	ventral	Z1-1	4.52195
	#43	43 a e	Magellania venosa	ventral	Z1-1	6.93893
	#43	43 a e	Magellania venosa	ventral	Z1-1	3.70159
	#43	43 a e	Magellania venosa	ventral	Z1-1	2.30544
	#43	43 a e	Magellania venosa	ventral	Z1-1	3.83972
	#43	43 a e	Magellania venosa	ventral	Z1-1	6.23102
	#43	43 a e	Magellania venosa	ventral	Z1-1	5.45454
	#43	43 a e	Magellania venosa	ventral	Z1-1	5.58821
	#43	43 a e	Magellania venosa	ventral	Z1-1	3.5797
	#43	43 a e	Magellania venosa	ventral	Z1-1	3.20856
	#43	43 a e	Magellania venosa	ventral	Z1-1	3.19304
	#43	43 a e	Magellania venosa	ventral	Z1-1	4.08737
	#43	43 a e	Magellania venosa	ventral	Z1-1	3.57104
	#43	43 a e	Magellania venosa	ventral	Z1-1	2.75823
	#43	43 a e	Magellania venosa	ventral	Z1-1	4.91298
	#43	43 a e	Magellania venosa	ventral	Z1-1	2.30764
	#43	43 a e	Magellania venosa	ventral	Z1-1	3.11948
	#43	43 a e	Magellania venosa	ventral	Z1-1	5.14583
	#43	43 a e	Magellania venosa	ventral	Z1-1	1.63175
	#43	43 a e	Magellania venosa	ventral	Z1-1	2.94487
	#43	43 a e	Magellania venosa	ventral	Z1-1	2.84608
	#43	43 a e	Magellania venosa	ventral	Z1-1	3.48879
	#43	43 a e	Magellania venosa	ventral	Z1-1	2.49428
	#43	43 a e	Magellania venosa	ventral	Z1-1	3.55037
	#43	43 a e	Magellania venosa	ventral	Z1-1	2.94107
	#43	43 a e	Magellania venosa	ventral	Z1-1	4.45435
	#43	43 a e	Magellania venosa	ventral	Z1-1	3.29773
	#43	43 a e	Magellania venosa	ventral	Z1-1	2.55444
	#43	43 a e	Magellania venosa	ventral	Z1-1	3.42694
	#43	43 a e	Magellania venosa	ventral	Z1-1	3.95012
	#43	43 a e	Magellania venosa	ventral	Z1-1	4.31267
	#43	43 a e	Magellania venosa	ventral	Z1-1	4.23919
	#43	43 a e	Magellania venosa	ventral	Z1-1	5.22391
	#43	43 a e	Magellania venosa	ventral	Z1-1	4.23919
	#43	43 a e	Magellania venosa	ventral	Z1-1	4.67359
	#43	43 a e	Magellania venosa	ventral	Z1-1	3.38635
	#43	43 a e	Magellania venosa	ventral	Z1-1	3.39551
	#43	43 a e	Magellania venosa	ventral	Z1-1	3.58566
	#43	43 a e	Magellania venosa	ventral	Z1-1	3.66837
	#43	43 a e	Magellania venosa	ventral	Z1-1	3.04541
	#43	43 a e	Magellania venosa	ventral	Z1-1	2.85427
	#43	43 a e	Magellania venosa	ventral	Z1-1	3.27777
	#43	43 a e	Magellania venosa	ventral	Z1-1	5.3773
	#43	43 a e	Magellania venosa	ventral	Z1-1	3.90257
	#43	43 a e	Magellania venosa	ventral	Z1-1	3.23108
	#43	43 a e	Magellania venosa	ventral	Z1-1	4.75431
	#43	43 a e	Magellania venosa	ventral	Z1-1	3.09031
	#43	43 a e	Magellania venosa	ventral	Z1-1	3.89438
	#43	43 a e	Magellania venosa	ventral	Z1-1	4.47025
	#43	43 a e	Magellania venosa	ventral	Z1-1	2.71842
	#43	43 a e	Magellania venosa	ventral	Z1-1	3.98194
	#43	43 a e	Magellania venosa	ventral	Z1-1	4.56062
	#43	43 a e	Magellania venosa	ventral	Z1-1	3.35704
	#43	43 a e	Magellania venosa	ventral	Z1-1	2.85427
	#43	43 a e	Magellania venosa	ventral	Z1-1	2.85426
	#43	43 a e	Magellania venosa	ventral	Z1-1	5.25694
	#43	43 a e	Magellania venosa	ventral	Z1-1	3.46732
	#43	43 a e	Magellania venosa	ventral	Z1-1	3.66013
	#43	43 a e	Magellania venosa	ventral	Z1-1	3.53813
	#43	43 a e	Magellania venosa	ventral	Z1-1	3.44751
	#43	43 a e	Magellania venosa	ventral	Z1-1	4.24243
	#43	43 a e	Magellania venosa	ventral	Z1-1	2.935
	#43	43 a e	Magellania venosa	ventral	Z1-1	2.97154
	#43	43 a e	Magellania venosa	ventral	Z1-1	4.33746
	#43	43 a e	Magellania venosa	ventral	Z1-1	2.45649
	#43	43 a e	Magellania venosa	ventral	Z1-1	2.67433
	#43	43 a e	Magellania venosa	ventral	Z1-1	3.72414
	#43	43 a e	Magellania venosa	ventral	Z1-1	3.16967
	#43	43 a e	Magellania venosa	ventral	Z1-1	3.03552
	#43	43 a se	Magellania venosa	ventral	Z1-2	6.21397
	#43	43 a se	Magellania venosa	ventral	Z1-2	3.89899
	#43	43 a se	Magellania venosa	ventral	Z1-2	5.37114
	#43	43 a se	Magellania venosa	ventral	Z1-2	4.31424
	#43	43 a se	Magellania venosa	ventral	Z1-2	3.39001
	#43	43 a se	Magellania venosa	ventral	Z1-2	3.2499
	#43	43 a se	Magellania venosa	ventral	Z1-2	3.27777
	#43	43 a se	Magellania venosa	ventral	Z1-2	4.01672
	#43	43 a se	Magellania venosa	ventral	Z1-2	3.72595
	#43	43 a se	Magellania venosa	ventral	Z1-2	3.55793
	#43	43 a se	Magellania venosa	ventral	Z1-2	4.74756
	#43	43 a se	Magellania venosa	ventral	Z1-2	3.52747
	#43	43 a se	Magellania venosa	ventral	Z1-2	3.45014
	#43	43 a se	Magellania venosa	ventral	Z1-2	5.87065
	#43	43 a se	Magellania venosa	ventral	Z1-2	4.77412
	#43	43 a se	Magellania venosa	ventral	Z1-2	7.24219
	#43	43 a se	Magellania venosa	ventral	Z1-2	3.65846
	#43	43 a se	Magellania venosa	ventral	Z1-2	2.15927
	#43	43 a se	Magellania venosa	ventral	Z1-2	3.5661
	#43	43 a se	Magellania venosa	ventral	Z1-2	3.52745
	#43	43 a se	Magellania venosa	ventral	Z1-2	4.43732
	#43	43 a se	Magellania venosa	ventral	Z1-2	4.8305
	#43	43 a se	Magellania venosa	ventral	Z1-2	2.66491
	#43	43 a se	Magellania venosa	ventral	Z1-2	2.39913
	#43	43 a se	Magellania venosa	ventral	Z1-2	4.81384
	#43	43 a se	Magellania venosa	ventral	Z1-2	5.36609
	#43	43 a se	Magellania venosa	ventral	Z1-2	4.67844
	#43	43 a se	Magellania venosa	ventral	Z1-2	4.06407
	#43	43 a se	Magellania venosa	ventral	Z1-2	4.83049
	#43	43 a se	Magellania venosa	ventral	Z1-2	3.39548
	#43	43 a se	Magellania venosa	ventral	Z1-2	3.2635
	#43	43 a se	Magellania venosa	ventral	Z1-2	3.90076
	#43	43 a se	Magellania venosa	ventral	Z1-2	3.66836
	#43	43 a se	Magellania venosa	ventral	Z1-2	4.16108
	#43	43 a se	Magellania venosa	ventral	Z1-2	3.53815
	#43	43 a se	Magellania venosa	ventral	Z1-2	4.31267
	#43	43 a se	Magellania venosa	ventral	Z1-2	4.0874
	#43	43 a se	Magellania venosa	ventral	Z1-2	4.44444
	#43	43 a se	Magellania venosa	ventral	Z1-2	5.2693
	#43	43 a se	Magellania venosa	ventral	Z1-2	3.95763
	#43	43 a se	Magellania venosa	ventral	Z1-2	3.92835
	#43	43 a se	Magellania venosa	ventral	Z1-2	4.20692
	#43	43 a se	Magellania venosa	ventral	Z1-2	3.92227
	#43	43 a se	Magellania venosa	ventral	Z1-2	3.76876
	#43	43 a se	Magellania venosa	ventral	Z1-2	3.32787
	#43	43 a se	Magellania venosa	ventral	Z1-2	5.35746
	#43	43 a se	Magellania venosa	ventral	Z1-2	3.75274
	#43	43 a se	Magellania venosa	ventral	Z1-2	5.02097
	#43	43 a se	Magellania venosa	ventral	Z1-2	4.67488
	#43	43 a se	Magellania venosa	ventral	Z1-2	3.67633
	#43	43 a se	Magellania venosa	ventral	Z1-2	4.44464
	#43	43 a se	Magellania venosa	ventral	Z1-2	3.8035
	#43	43 a se	Magellania venosa	ventral	Z1-2	4.59606
	#43	43 a se	Magellania venosa	ventral	Z1-2	3.34699
	#43	43 a se	Magellania venosa	ventral	Z1-2	4.04105
	#43	43 a se	Magellania venosa	ventral	Z1-2	4.35797
	#43	43 a se	Magellania venosa	ventral	Z1-2	3.63867
	#43	43 a se	Magellania venosa	ventral	Z1-2	3.14594
	#43	43 a se	Magellania venosa	ventral	Z1-2	3.25636
	#43	43 a se	Magellania venosa	ventral	Z1-2	2.74377
	#43	43 a se	Magellania venosa	ventral	Z1-2	4.33746
	#43	43 a se	Magellania venosa	ventral	Z1-2	3.773
	#43	43 a se	Magellania venosa	ventral	Z1-2	4.51669
	#43	43 a se	Magellania venosa	ventral	Z1-2	3.04541
	#43	43 a se	Magellania venosa	ventral	Z1-2	3.01096
	#43	43 a se	Magellania venosa	ventral	Z1-2	3.474
	#43	43 a se	Magellania venosa	ventral	Z1-2	2.91188
	#43	43 a se	Magellania venosa	ventral	Z1-2	4.44444
	#43	43 a se	Magellania venosa	ventral	Z1-2	4.92423
	#43	43 a se	Magellania venosa	ventral	Z1-2	4.6538
	#43	43 a se	Magellania venosa	ventral	Z1-2	3.34705
	#43	43 sa e	Magellania venosa	ventral	Z2-1	3.64697
	#43	43 sa e	Magellania venosa	ventral	Z2-1	3.30215
	#43	43 sa e	Magellania venosa	ventral	Z2-1	3.02425
	#43	43 sa e	Magellania venosa	ventral	Z2-1	3.35688
	#43	43 sa e	Magellania venosa	ventral	Z2-1	5.52014
	#43	43 sa e	Magellania venosa	ventral	Z2-1	3.2897
	#43	43 sa e	Magellania venosa	ventral	Z2-1	3.74921
	#43	43 sa e	Magellania venosa	ventral	Z2-1	3.23105
	#43	43 sa e	Magellania venosa	ventral	Z2-1	3.26349
	#43	43 sa e	Magellania venosa	ventral	Z2-1	5.8765
	#43	43 sa e	Magellania venosa	ventral	Z2-1	3.86966
	#43	43 sa e	Magellania venosa	ventral	Z2-1	3.16371
	#43	43 sa e	Magellania venosa	ventral	Z2-1	4.55611
	#43	43 sa e	Magellania venosa	ventral	Z2-1	3.19304
	#43	43 sa e	Magellania venosa	ventral	Z2-1	2.94107
	#43	43 sa e	Magellania venosa	ventral	Z2-1	3.14594
	#43	43 sa e	Magellania venosa	ventral	Z2-1	3.1344
	#43	43 sa e	Magellania venosa	ventral	Z2-1	1.95036
	#43	43 sa e	Magellania venosa	ventral	Z2-1	3.72412
	#43	43 sa e	Magellania venosa	ventral	Z2-1	3.95007
	#43	43 sa e	Magellania venosa	ventral	Z2-1	2.65109
	#43	43 sa e	Magellania venosa	ventral	Z2-1	3.35681
	#43	43 sa e	Magellania venosa	ventral	Z2-1	3.99564
	#43	43 sa e	Magellania venosa	ventral	Z2-1	3.55036
	#43	43 sa e	Magellania venosa	ventral	Z2-1	5.53625
	#43	43 sa e	Magellania venosa	ventral	Z2-1	4.15983
	#43	43 sa e	Magellania venosa	ventral	Z2-1	2.9411
	#43	43 sa e	Magellania venosa	ventral	Z2-1	4.47894
	#43	43 sa e	Magellania venosa	ventral	Z2-1	4.80188
	#43	43 sa e	Magellania venosa	ventral	Z2-1	4.61526
	#43	43 sa e	Magellania venosa	ventral	Z2-1	5.32898
	#43	43 sa e	Magellania venosa	ventral	Z2-1	4.84848
	#43	43 sa e	Magellania venosa	ventral	Z2-1	5.27295
	#43	43 sa e	Magellania venosa	ventral	Z2-1	4.21829
	#43	43 sa e	Magellania venosa	ventral	Z2-1	4.75425
	#43	43 sa e	Magellania venosa	ventral	Z2-1	3.20911
	#43	43 sa e	Magellania venosa	ventral	Z2-1	3.92228
	#43	43 sa e	Magellania venosa	ventral	Z2-1	5.45748
	#43	43 sa e	Magellania venosa	ventral	Z2-1	5.05585
	#43	43 sa e	Magellania venosa	ventral	Z2-1	3.96008
	#43	43 sa e	Magellania venosa	ventral	Z2-1	4.85689
	#43	43 sa e	Magellania venosa	ventral	Z2-1	4.59624
	#43	43 sa e	Magellania venosa	ventral	Z2-1	4.53641
	#43	43 sa e	Magellania venosa	ventral	Z2-1	4.2392
	#43	43 sa e	Magellania venosa	ventral	Z2-1	3.89905
	#43	43 sa e	Magellania venosa	ventral	Z2-1	4.63129
	#43	43 sa e	Magellania venosa	ventral	Z2-1	3.4537
	#43	43 sa e	Magellania venosa	ventral	Z2-1	3.43434
	#43	43 sa e	Magellania venosa	ventral	Z2-1	4.50827
	#43	43 sa e	Magellania venosa	ventral	Z2-1	3.30816
	#43	43 sa e	Magellania venosa	ventral	Z2-1	3.86638
	#43	43 sa e	Magellania venosa	ventral	Z2-1	5.43686
	#43	43 sa e	Magellania venosa	ventral	Z2-1	4.36212
	#43	43 sa e	Magellania venosa	ventral	Z2-1	3.6601
	#43	43 sa e	Magellania venosa	ventral	Z2-1	3.05368
	#43	43 sa e	Magellania venosa	ventral	Z2-1	3.647
	#43	43 sa e	Magellania venosa	ventral	Z2-1	3.96632
	#43	43 sa e	Magellania venosa	ventral	Z2-1	3.64197
	#43	43 sa e	Magellania venosa	ventral	Z2-1	4.16107
	#43	43 sa e	Magellania venosa	ventral	Z2-1	4.29883
	#43	43 sa e	Magellania venosa	ventral	Z2-1	3.55793
	#43	43 sa se	Magellania venosa	ventral	Z2-2	4.11169
	#43	43 sa se	Magellania venosa	ventral	Z2-2	3.51801
	#43	43 sa se	Magellania venosa	ventral	Z2-2	4.74731
	#43	43 sa se	Magellania venosa	ventral	Z2-2	3.52343
	#43	43 sa se	Magellania venosa	ventral	Z2-2	3.31902
	#43	43 sa se	Magellania venosa	ventral	Z2-2	3.4758
	#43	43 sa se	Magellania venosa	ventral	Z2-2	3.30212
	#43	43 sa se	Magellania venosa	ventral	Z2-2	5.9124
	#43	43 sa se	Magellania venosa	ventral	Z2-2	3.67413
	#43	43 sa se	Magellania venosa	ventral	Z2-2	4.98689
	#43	43 sa se	Magellania venosa	ventral	Z2-2	2.84441
	#43	43 sa se	Magellania venosa	ventral	Z2-2	3.38636
	#43	43 sa se	Magellania venosa	ventral	Z2-2	3.36781
	#43	43 sa se	Magellania venosa	ventral	Z2-2	3.57967
	#43	43 sa se	Magellania venosa	ventral	Z2-2	4.67364
	#43	43 sa se	Magellania venosa	ventral	Z2-2	4.74747
	#43	43 sa se	Magellania venosa	ventral	Z2-2	4.49699
	#43	43 sa se	Magellania venosa	ventral	Z2-2	2.68092
	#43	43 sa se	Magellania venosa	ventral	Z2-2	5.9606
	#43	43 sa se	Magellania venosa	ventral	Z2-2	3.84292
	#43	43 sa se	Magellania venosa	ventral	Z2-2	4.47894
	#43	43 sa se	Magellania venosa	ventral	Z2-2	5.91113
	#43	43 sa se	Magellania venosa	ventral	Z2-2	4.88454
	#43	43 sa se	Magellania venosa	ventral	Z2-2	6.2196
	#43	43 sa se	Magellania venosa	ventral	Z2-2	7.40881
	#43	43 sa se	Magellania venosa	ventral	Z2-2	4.55609
	#43	43 sa se	Magellania venosa	ventral	Z2-2	4.25171
	#43	43 sa se	Magellania venosa	ventral	Z2-2	5.42804
	#43	43 sa se	Magellania venosa	ventral	Z2-2	5.71399
	#43	43 sa se	Magellania venosa	ventral	Z2-2	4.2428
	#43	43 sa se	Magellania venosa	ventral	Z2-2	6.23896
	#43	43 sa se	Magellania venosa	ventral	Z2-2	6.33881
	#43	43 sa se	Magellania venosa	ventral	Z2-2	5.28803
	#43	43 sa se	Magellania venosa	ventral	Z2-2	4.15118
	#43	43 sa se	Magellania venosa	ventral	Z2-2	7.66663
	#43	43 sa se	Magellania venosa	ventral	Z2-2	4.29602
	#43	43 sa se	Magellania venosa	ventral	Z2-2	5.02089
	#43	43 sa se	Magellania venosa	ventral	Z2-2	4.28546
	#43	43 sa se	Magellania venosa	ventral	Z2-2	5.28204
	#43	43 sa se	Magellania venosa	ventral	Z2-2	3.42693
	#43	43 sa se	Magellania venosa	ventral	Z2-2	5.09082
	#43	43 sa se	Magellania venosa	ventral	Z2-2	4.05426
	#43	43 sa se	Magellania venosa	ventral	Z2-2	4.64264
	#43	43 sa se	Magellania venosa	ventral	Z2-2	5.88464
	#43	43 sa se	Magellania venosa	ventral	Z2-2	3.43412
	#43	43 sa se	Magellania venosa	ventral	Z2-2	3.35703
	#43	43 sa se	Magellania venosa	ventral	Z2-2	4.51047
	#43	43 sa se	Magellania venosa	ventral	Z2-2	4.87465
	#43	43 sa se	Magellania venosa	ventral	Z2-2	5.18993
	#43	43 sa se	Magellania venosa	ventral	Z2-2	3.80231
	#43	43 sa se	Magellania venosa	ventral	Z2-2	5.80658
	#43	43 sa se	Magellania venosa	ventral	Z2-2	4.47894
	#43	43 sa se	Magellania venosa	ventral	Z2-2	5.48718
	#43	43 sa se	Magellania venosa	ventral	Z2-2	2.94107
	#43	43 sa se	Magellania venosa	ventral	Z2-2	5.31088
	#43	43 sa se	Magellania venosa	ventral	Z2-2	4.44444
	#63	63 a e	Magellania venosa	ventral	Z1-1	3.63832
	#63	63 a e	Magellania venosa	ventral	Z1-1	3.72414
	#63	63 a e	Magellania venosa	ventral	Z1-1	4.97209
	#63	63 a e	Magellania venosa	ventral	Z1-1	3.26038
	#63	63 a e	Magellania venosa	ventral	Z1-1	3.11551
	#63	63 a e	Magellania venosa	ventral	Z1-1	4.60498
	#63	63 a e	Magellania venosa	ventral	Z1-1	3.70444
	#63	63 a e	Magellania venosa	ventral	Z1-1	3.04541
	#63	63 a e	Magellania venosa	ventral	Z1-1	3.63867
	#63	63 a e	Magellania venosa	ventral	Z1-1	3.1344
	#63	63 a e	Magellania venosa	ventral	Z1-1	3.96632
	#63	63 a e	Magellania venosa	ventral	Z1-1	3.38752
	#63	63 a e	Magellania venosa	ventral	Z1-1	2.65462
	#63	63 a e	Magellania venosa	ventral	Z1-1	3.55035
	#63	63 a e	Magellania venosa	ventral	Z1-1	3.31902
	#63	63 a e	Magellania venosa	ventral	Z1-1	3.25636
	#63	63 a e	Magellania venosa	ventral	Z1-1	4.12042
	#63	63 a e	Magellania venosa	ventral	Z1-1	3.43762
	#63	63 a e	Magellania venosa	ventral	Z1-1	3.48663
	#63	63 a e	Magellania venosa	ventral	Z1-1	4.59119
	#63	63 a e	Magellania venosa	ventral	Z1-1	4.1507
	#63	63 a e	Magellania venosa	ventral	Z1-1	2.8937
	#63	63 a e	Magellania venosa	ventral	Z1-1	3.59605
	#63	63 a e	Magellania venosa	ventral	Z1-1	3.17017
	#63	63 a e	Magellania venosa	ventral	Z1-1	3.4399
	#63	63 a e	Magellania venosa	ventral	Z1-1	2.62626
	#63	63 a e	Magellania venosa	ventral	Z1-1	3.44751
	#63	63 a e	Magellania venosa	ventral	Z1-1	2.94489
	#63	63 a e	Magellania venosa	ventral	Z1-1	3.04541
	#63	63 a e	Magellania venosa	ventral	Z1-1	2.39452
	#63	63 a e	Magellania venosa	ventral	Z1-1	2.43961
	#63	63 a e	Magellania venosa	ventral	Z1-1	3.14594
	#63	63 a e	Magellania venosa	ventral	Z1-1	2.65109
	#63	63 a e	Magellania venosa	ventral	Z1-1	3.1098
	#63	63 a e	Magellania venosa	ventral	Z1-1	2.81509
	#63	63 a e	Magellania venosa	ventral	Z1-1	2.81509
	#63	63 a se	Magellania venosa	ventral	Z1-2	4.02254
	#63	63 a se	Magellania venosa	ventral	Z1-2	3.4399
	#63	63 a se	Magellania venosa	ventral	Z1-2	5.13818
	#63	63 a se	Magellania venosa	ventral	Z1-2	3.66011
	#63	63 a se	Magellania venosa	ventral	Z1-2	4.48242
	#63	63 a se	Magellania venosa	ventral	Z1-2	5.06578
	#63	63 a se	Magellania venosa	ventral	Z1-2	5.21014
	#63	63 a se	Magellania venosa	ventral	Z1-2	3.40723
	#63	63 a se	Magellania venosa	ventral	Z1-2	3.32787
	#63	63 a se	Magellania venosa	ventral	Z1-2	3.29764
	#63	63 a se	Magellania venosa	ventral	Z1-2	3.23108
	#63	63 a se	Magellania venosa	ventral	Z1-2	5.1039
	#63	63 a se	Magellania venosa	ventral	Z1-2	4.55328
	#63	63 a se	Magellania venosa	ventral	Z1-2	4.66369
	#63	63 a se	Magellania venosa	ventral	Z1-2	6.19135
	#63	63 a se	Magellania venosa	ventral	Z1-2	4.76422
	#63	63 a se	Magellania venosa	ventral	Z1-2	4.65379
	#63	63 a se	Magellania venosa	ventral	Z1-2	4.38196
	#63	63 a se	Magellania venosa	ventral	Z1-2	4.1507
	#63	63 a se	Magellania venosa	ventral	Z1-2	3.35703
	#63	63 a se	Magellania venosa	ventral	Z1-2	3.23364
	#63	63 a se	Magellania venosa	ventral	Z1-2	3.23105
	#63	63 a se	Magellania venosa	ventral	Z1-2	3.07685
	#63	63 a se	Magellania venosa	ventral	Z1-2	5.61433
	#63	63 a se	Magellania venosa	ventral	Z1-2	2.55554
	#63	63 a se	Magellania venosa	ventral	Z1-2	4.36218
	#63	63 a se	Magellania venosa	ventral	Z1-2	3.32787
	#63	63 a se	Magellania venosa	ventral	Z1-2	2.94489
	#63	63 a se	Magellania venosa	ventral	Z1-2	4.18088
	#63	63 a se	Magellania venosa	ventral	Z1-2	3.23105
	#63	63 a se	Magellania venosa	ventral	Z1-2	3.35687
	#63	63 a se	Magellania venosa	ventral	Z1-2	3.01096
	#63	63 a se	Magellania venosa	ventral	Z1-2	3.38752
	#63	63 a se	Magellania venosa	ventral	Z1-2	4.74731
	#63	63 a se	Magellania venosa	ventral	Z1-2	4.31856
	#63	63 sa e	Magellania venosa	ventral	Z2-1	5.53249
	#63	63 sa e	Magellania venosa	ventral	Z2-1	4.38228
	#63	63 sa e	Magellania venosa	ventral	Z2-1	3.42693
	#63	63 sa e	Magellania venosa	ventral	Z2-1	2.98277
	#63	63 sa e	Magellania venosa	ventral	Z2-1	2.84437
	#63	63 sa e	Magellania venosa	ventral	Z2-1	4.61576
	#63	63 sa e	Magellania venosa	ventral	Z2-1	3.16965
	#63	63 sa e	Magellania venosa	ventral	Z2-1	5.85281
	#63	63 sa e	Magellania venosa	ventral	Z2-1	4.83665
	#63	63 sa e	Magellania venosa	ventral	Z2-1	4.07043
	#63	63 sa e	Magellania venosa	ventral	Z2-1	4.081
	#63	63 sa e	Magellania venosa	ventral	Z2-1	4.04105
	#63	63 sa e	Magellania venosa	ventral	Z2-1	3.4574
	#63	63 sa e	Magellania venosa	ventral	Z2-1	3.60536
	#63	63 sa e	Magellania venosa	ventral	Z2-1	3.98194
	#63	63 sa e	Magellania venosa	ventral	Z2-1	4.17098
	#63	63 sa e	Magellania venosa	ventral	Z2-1	3.38673
	#63	63 sa e	Magellania venosa	ventral	Z2-1	3.36781
	#63	63 sa e	Magellania venosa	ventral	Z2-1	4.85484
	#63	63 sa e	Magellania venosa	ventral	Z2-1	4.78401
	#63	63 sa e	Magellania venosa	ventral	Z2-1	4.87302
	#63	63 sa e	Magellania venosa	ventral	Z2-1	3.84961
	#63	63 sa e	Magellania venosa	ventral	Z2-1	3.96991
	#63	63 sa e	Magellania venosa	ventral	Z2-1	4.05066
	#63	63 sa se	Magellania venosa	ventral	Z2-2	5.75778
	#63	63 sa se	Magellania venosa	ventral	Z2-2	5.85282
	#63	63 sa se	Magellania venosa	ventral	Z2-2	4.06407
	#63	63 sa se	Magellania venosa	ventral	Z2-2	5.06586
	#63	63 sa se	Magellania venosa	ventral	Z2-2	4.10072
	#63	63 sa se	Magellania venosa	ventral	Z2-2	4.18896
	#63	63 sa se	Magellania venosa	ventral	Z2-2	4.2392
	#63	63 sa se	Magellania venosa	ventral	Z2-2	4.8305
	#63	63 sa se	Magellania venosa	ventral	Z2-2	5.08188
	#63	63 sa se	Magellania venosa	ventral	Z2-2	3.64197
	#63	63 sa se	Magellania venosa	ventral	Z2-2	4.05065
	#63	63 sa se	Magellania venosa	ventral	Z2-2	6.83136
	#63	63 sa se	Magellania venosa	ventral	Z2-2	5.66557
	#63	63 sa se	Magellania venosa	ventral	Z2-2	7.18671
	#63	63 sa se	Magellania venosa	ventral	Z2-2	5.07569
	#63	63 sa se	Magellania venosa	ventral	Z2-2	4.88622
	#63	63 sa se	Magellania venosa	ventral	Z2-2	3.67635
	#63	63 sa se	Magellania venosa	ventral	Z2-2	5.70853
	#63	63 sa se	Magellania venosa	ventral	Z2-2	4.98652
	#63	63 sa se	Magellania venosa	ventral	Z2-2	4.51669
	#8005	8005D a e	Magellania venosa	dorsal	Z4-1	4.37153
	#8005	8005D a e	Magellania venosa	dorsal	Z4-1	5.45829
	#8005	8005D a e	Magellania venosa	dorsal	Z4-1	3.75372
	#8005	8005D a e	Magellania venosa	dorsal	Z4-1	4.98953
	#8005	8005D a e	Magellania venosa	dorsal	Z4-1	4.9977
	#8005	8005D a e	Magellania venosa	dorsal	Z4-1	5.1525
	#8005	8005D a e	Magellania venosa	dorsal	Z4-1	4.36102
	#8005	8005D a e	Magellania venosa	dorsal	Z4-1	5.17621
	#8005	8005D a e	Magellania venosa	dorsal	Z4-1	4.52295
	#8005	8005D a e	Magellania venosa	dorsal	Z4-1	3.84635
	#8005	8005D a e	Magellania venosa	dorsal	Z4-1	3.45508
	#8005	8005D a e	Magellania venosa	dorsal	Z4-1	3.88594
	#8005	8005D a e	Magellania venosa	dorsal	Z4-1	4.40061
	#8005	8005D a e	Magellania venosa	dorsal	Z4-1	3.41796
	#8005	8005D a e	Magellania venosa	dorsal	Z4-1	2.53131
	#8005	8005D a e	Magellania venosa	dorsal	Z4-1	3.87147
	#8005	8005D a e	Magellania venosa	dorsal	Z4-1	2.1475
	#8005	8005D a e	Magellania venosa	dorsal	Z4-1	4.37036
	#8005	8005D a e	Magellania venosa	dorsal	Z4-1	3.99597
	#8005	8005D a e	Magellania venosa	dorsal	Z4-1	5.60037
	#8005	8005D a e	Magellania venosa	dorsal	Z4-1	4.56785
	#8005	8005D a e	Magellania venosa	dorsal	Z4-1	2.75889
	#8005	8005D a e	Magellania venosa	dorsal	Z4-1	5.23111
	#8005	8005D a e	Magellania venosa	dorsal	Z4-1	4.15985
	#8005	8005D a e	Magellania venosa	dorsal	Z4-1	3.03871
	#8005	8005D a e	Magellania venosa	dorsal	Z4-1	3.4284
	#8005	8005D a e	Magellania venosa	dorsal	Z4-1	5.86642
	#8005	8005D a e	Magellania venosa	dorsal	Z4-1	3.93939
	#8005	8005D a e	Magellania venosa	dorsal	Z4-1	5.74605
	#8005	8005D a e	Magellania venosa	dorsal	Z4-1	5.97328
	#8005	8005D a e	Magellania venosa	dorsal	Z4-1	5.41418
	#8005	8005D a e	Magellania venosa	dorsal	Z4-1	3.26061
	#8005	8005D a e	Magellania venosa	dorsal	Z4-1	6.20205
	#8005	8005D a e	Magellania venosa	dorsal	Z4-1	4.67929
	#8005	8005D a e	Magellania venosa	dorsal	Z4-1	5.37731
	#8005	8005D a e	Magellania venosa	dorsal	Z4-1	3.62653
	#8005	8005D a e	Magellania venosa	dorsal	Z4-1	6.27971
	#8005	8005D a e	Magellania venosa	dorsal	Z4-1	3.84635
	#8005	8005D a e	Magellania venosa	dorsal	Z4-1	4.05175
	#8005	8005D a e	Magellania venosa	dorsal	Z4-1	3.75779
	#8005	8005D a e	Magellania venosa	dorsal	Z4-1	4.97417
	#8005	8005D a e	Magellania venosa	dorsal	Z4-1	4.20498
	#8005	8005D a e	Magellania venosa	dorsal	Z4-1	5.24961
	#8005	8005D a e	Magellania venosa	dorsal	Z4-1	4.56338
	#8005	8005D a e	Magellania venosa	dorsal	Z4-1	4.4833
	#8005	8005D a e	Magellania venosa	dorsal	Z4-1	4.47305
	#8005	8005D a e	Magellania venosa	dorsal	Z4-1	4.75499
	#8005	8005D a e	Magellania venosa	dorsal	Z4-1	5.9011
	#8005	8005D a e	Magellania venosa	dorsal	Z4-1	4.17576
	#8005	8005D a e	Magellania venosa	dorsal	Z4-1	7.10597
	#8005	8005D a e	Magellania venosa	dorsal	Z4-1	3.1362
	#8005	8005D a e	Magellania venosa	dorsal	Z4-1	4.89977
	#8005	8005D a e	Magellania venosa	dorsal	Z4-1	6.19135
	#8005	8005D a e	Magellania venosa	dorsal	Z4-1	4.15249
	#8005	8005D a e	Magellania venosa	dorsal	Z4-1	5.88032
	#8005	8005D a e	Magellania venosa	dorsal	Z4-1	3.27154
	#8005	8005D a e	Magellania venosa	dorsal	Z4-1	3.70447
	#8005	8005D a e	Magellania venosa	dorsal	Z4-1	4.77426
	#8005	8005D a se	Magellania venosa	dorsal	Z4-2	5.13167
	#8005	8005D a se	Magellania venosa	dorsal	Z4-2	4.85689
	#8005	8005D a se	Magellania venosa	dorsal	Z4-2	5.8725
	#8005	8005D a se	Magellania venosa	dorsal	Z4-2	4.18553
	#8005	8005D a se	Magellania venosa	dorsal	Z4-2	3.22126
	#8005	8005D a se	Magellania venosa	dorsal	Z4-2	5.01503
	#8005	8005D a se	Magellania venosa	dorsal	Z4-2	6.77069
	#8005	8005D a se	Magellania venosa	dorsal	Z4-2	3.37591
	#8005	8005D a se	Magellania venosa	dorsal	Z4-2	6.54153
	#8005	8005D a se	Magellania venosa	dorsal	Z4-2	4.25803
	#8005	8005D a se	Magellania venosa	dorsal	Z4-2	3.93032
	#8005	8005D a se	Magellania venosa	dorsal	Z4-2	4.53759
	#8005	8005D a se	Magellania venosa	dorsal	Z4-2	4.55778
	#8005	8005D a se	Magellania venosa	dorsal	Z4-2	4.77747
	#8005	8005D a se	Magellania venosa	dorsal	Z4-2	3.0721
	#8005	8005D a se	Magellania venosa	dorsal	Z4-2	4.06683
	#8005	8005D a se	Magellania venosa	dorsal	Z4-2	4.25323
	#8005	8005D a se	Magellania venosa	dorsal	Z4-2	5.68625
	#8005	8005D a se	Magellania venosa	dorsal	Z4-2	5.17621
	#8005	8005D a se	Magellania venosa	dorsal	Z4-2	3.19422
	#8005	8005D a se	Magellania venosa	dorsal	Z4-2	3.95103
	#8005	8005D a se	Magellania venosa	dorsal	Z4-2	6.20205
	#8005	8005D a se	Magellania venosa	dorsal	Z4-2	4.06683
	#8005	8005D a se	Magellania venosa	dorsal	Z4-2	3.6209
	#8005	8005D a se	Magellania venosa	dorsal	Z4-2	3.77405
	#8005	8005D a se	Magellania venosa	dorsal	Z4-2	6.04459
	#8005	8005D a se	Magellania venosa	dorsal	Z4-2	4.79026
	#8005	8005D a se	Magellania venosa	dorsal	Z4-2	6.49771
	#8005	8005D a se	Magellania venosa	dorsal	Z4-2	4.20498
	#8005	8005D a se	Magellania venosa	dorsal	Z4-2	5.11175
	#8005	8005D a se	Magellania venosa	dorsal	Z4-2	5.07268
	#8005	8005D a se	Magellania venosa	dorsal	Z4-2	3.96135
	#8005	8005D a se	Magellania venosa	dorsal	Z4-2	4.85689
	#8005	8005D a se	Magellania venosa	dorsal	Z4-2	4.859
	#8005	8005D a se	Magellania venosa	dorsal	Z4-2	3.48887
	#8005	8005D a se	Magellania venosa	dorsal	Z4-2	5.26998
	#8005	8005D a se	Magellania venosa	dorsal	Z4-2	3.7141
	#8005	8005D a se	Magellania venosa	dorsal	Z4-2	5.90542
	#8005	8005D a se	Magellania venosa	dorsal	Z4-2	5.27288
	#8005	8005D a se	Magellania venosa	dorsal	Z4-2	3.83971
	#8005	8005D a se	Magellania venosa	dorsal	Z4-2	5.39057
	#8005	8005D a se	Magellania venosa	dorsal	Z4-2	6.8404
	#8005	8005D a se	Magellania venosa	dorsal	Z4-2	5.07569
	#8005	8005D a se	Magellania venosa	dorsal	Z4-2	5.15053
	#8005	8005D a se	Magellania venosa	dorsal	Z4-2	4.1721
	#8005	8005D a se	Magellania venosa	dorsal	Z4-2	6.00819
	#8005	8005D a se	Magellania venosa	dorsal	Z4-2	4.98646
	#8005	8005D a se	Magellania venosa	dorsal	Z4-2	6.90498
	#8005	8005D a se	Magellania venosa	dorsal	Z4-2	5.96045
	#8005	8005D a se	Magellania venosa	dorsal	Z4-2	4.34813
	#8005	8005D a se	Magellania venosa	dorsal	Z4-2	6.16244
	#8005	8005D a se	Magellania venosa	dorsal	Z4-2	4.29738
	#8005	8005V 2sa e	Magellania venosa	ventral	Z3-1	4.77845
	#8005	8005V 2sa e	Magellania venosa	ventral	Z3-1	3.70739
	#8005	8005V 2sa e	Magellania venosa	ventral	Z3-1	5.54051
	#8005	8005V 2sa e	Magellania venosa	ventral	Z3-1	3.44579
	#8005	8005V 2sa e	Magellania venosa	ventral	Z3-1	5.10526
	#8005	8005V 2sa e	Magellania venosa	ventral	Z3-1	4.38968
	#8005	8005V 2sa e	Magellania venosa	ventral	Z3-1	3.69233
	#8005	8005V 2sa e	Magellania venosa	ventral	Z3-1	4.71982
	#8005	8005V 2sa e	Magellania venosa	ventral	Z3-1	3.659
	#8005	8005V 2sa e	Magellania venosa	ventral	Z3-1	2.6066
	#8005	8005V 2sa e	Magellania venosa	ventral	Z3-1	7.53399
	#8005	8005V 2sa e	Magellania venosa	ventral	Z3-1	3.74029
	#8005	8005V 2sa e	Magellania venosa	ventral	Z3-1	4.09837
	#8005	8005V 2sa e	Magellania venosa	ventral	Z3-1	4.09837
	#8005	8005V 2sa e	Magellania venosa	ventral	Z3-1	4.07383
	#8005	8005V 2sa e	Magellania venosa	ventral	Z3-1	3.33741
	#8005	8005V 2sa e	Magellania venosa	ventral	Z3-1	2.44794
	#8005	8005V 2sa e	Magellania venosa	ventral	Z3-1	2.78829
	#8005	8005V 2sa e	Magellania venosa	ventral	Z3-1	3.48436
	#8005	8005V 2sa e	Magellania venosa	ventral	Z3-1	6.78407
	#8005	8005V 2sa e	Magellania venosa	ventral	Z3-1	3.659
	#8005	8005V 2sa e	Magellania venosa	ventral	Z3-1	3.6315
	#8005	8005V 2sa e	Magellania venosa	ventral	Z3-1	5.44725
	#8005	8005V 2sa e	Magellania venosa	ventral	Z3-1	5.50421
	#8005	8005V 2sa e	Magellania venosa	ventral	Z3-1	3.30387
	#8005	8005V 2sa e	Magellania venosa	ventral	Z3-1	4.34633
	#8005	8005V 2sa e	Magellania venosa	ventral	Z3-1	3.80524
	#8005	8005V 2sa e	Magellania venosa	ventral	Z3-1	4.40741
	#8005	8005V 2sa e	Magellania venosa	ventral	Z3-1	3.49394
	#8005	8005V 2sa e	Magellania venosa	ventral	Z3-1	3.69233
	#8005	8005V 2sa e	Magellania venosa	ventral	Z3-1	5.91956
	#8005	8005V 2sa e	Magellania venosa	ventral	Z3-1	2.21882
	#8005	8005V 2sa e	Magellania venosa	ventral	Z3-1	3.80524
	#8005	8005V 2sa e	Magellania venosa	ventral	Z3-1	4.07383
	#8005	8005V 2sa e	Magellania venosa	ventral	Z3-1	3.25975
	#8005	8005V 2sa e	Magellania venosa	ventral	Z3-1	3.60997
	#8005	8005V 2sa e	Magellania venosa	ventral	Z3-1	3.40351
	#8005	8005V 2sa e	Magellania venosa	ventral	Z3-1	4.30514
	#8005	8005V 2sa e	Magellania venosa	ventral	Z3-1	4.49003
	#8005	8005V 2sa e	Magellania venosa	ventral	Z3-1	4.20302
	#8005	8005V 2sa e	Magellania venosa	ventral	Z3-1	4.06014
	#8005	8005V 2sa e	Magellania venosa	ventral	Z3-1	2.46156
	#8005	8005V 2sa e	Magellania venosa	ventral	Z3-1	4.24784
	#8005	8005V 2sa e	Magellania venosa	ventral	Z3-1	3.9517
	#8005	8005V 2sa se	Magellania venosa	ventral	Z3-2	5.5244
	#8005	8005V 2sa se	Magellania venosa	ventral	Z3-2	5.50421
	#8005	8005V 2sa se	Magellania venosa	ventral	Z3-2	3.60997
	#8005	8005V 2sa se	Magellania venosa	ventral	Z3-2	7.78412
	#8005	8005V 2sa se	Magellania venosa	ventral	Z3-2	5.07463
	#8005	8005V 2sa se	Magellania venosa	ventral	Z3-2	5.61837
	#8005	8005V 2sa se	Magellania venosa	ventral	Z3-2	5.73414
	#8005	8005V 2sa se	Magellania venosa	ventral	Z3-2	5.57258
	#8005	8005V 2sa se	Magellania venosa	ventral	Z3-2	4.38968
	#8005	8005V 2sa se	Magellania venosa	ventral	Z3-2	5.99435
	#8005	8005V 2sa se	Magellania venosa	ventral	Z3-2	7.14238
	#8005	8005V 2sa se	Magellania venosa	ventral	Z3-2	5.95894
	#8005	8005V 2sa se	Magellania venosa	ventral	Z3-2	6.67483
	#8005	8005V 2sa se	Magellania venosa	ventral	Z3-2	5.32733
	#8005	8005V 2sa se	Magellania venosa	ventral	Z3-2	5.17461
	#8005	8005V 2sa se	Magellania venosa	ventral	Z3-2	5.14655
	#8005	8005V 2sa se	Magellania venosa	ventral	Z3-2	4.86164
	#8005	8005V 2sa se	Magellania venosa	ventral	Z3-2	3.02216
	#8005	8005V 2sa se	Magellania venosa	ventral	Z3-2	4.27658
	#8005	8005V 2sa se	Magellania venosa	ventral	Z3-2	5.00612
	#8005	8005V 2sa se	Magellania venosa	ventral	Z3-2	4.74101
	#8005	8005V 2sa se	Magellania venosa	ventral	Z3-2	5.3586
	#8005	8005V 2sa se	Magellania venosa	ventral	Z3-2	5.33986
	#8005	8005V 2sa se	Magellania venosa	ventral	Z3-2	4.42003
	#8005	8005V 2sa se	Magellania venosa	ventral	Z3-2	5.90449
	#8005	8005V 2sa se	Magellania venosa	ventral	Z3-2	4.05465
	#8005	8005V 2sa se	Magellania venosa	ventral	Z3-2	5.67361
	#8005	8005V 2sa se	Magellania venosa	ventral	Z3-2	4.24521
	#8005	8005V 2sa se	Magellania venosa	ventral	Z3-2	6.7495
	#8005	8005V 2sa se	Magellania venosa	ventral	Z3-2	4.42003
	#8005	8005V 2sa se	Magellania venosa	ventral	Z3-2	4.60998
	#8005	8005V 2sa se	Magellania venosa	ventral	Z3-2	4.57847
	#8005	8005V 2sa se	Magellania venosa	ventral	Z3-2	4.81329
	#8005	8005V 2sa se	Magellania venosa	ventral	Z3-2	4.49994
	#8005	8005V 2sa se	Magellania venosa	ventral	Z3-2	3.9517
	#8005	8005V 2sa se	Magellania venosa	ventral	Z3-2	3.22195
	#8005	8005V 2sa se	Magellania venosa	ventral	Z3-2	4.88906
	#8005	8005V 2sa se	Magellania venosa	ventral	Z3-2	4.09837
	#8005	8005V a e	Magellania venosa	ventral	Z1-1	6.58505
	#8005	8005V a e	Magellania venosa	ventral	Z1-1	4.20498
	#8005	8005V a e	Magellania venosa	ventral	Z1-1	3.83971
	#8005	8005V a e	Magellania venosa	ventral	Z1-1	4.53759
	#8005	8005V a e	Magellania venosa	ventral	Z1-1	6.89981
	#8005	8005V a e	Magellania venosa	ventral	Z1-1	6.17154
	#8005	8005V a e	Magellania venosa	ventral	Z1-1	5.80083
	#8005	8005V a e	Magellania venosa	ventral	Z1-1	4.69561
	#8005	8005V a e	Magellania venosa	ventral	Z1-1	4.12166
	#8005	8005V a e	Magellania venosa	ventral	Z1-1	5.19196
	#8005	8005V a e	Magellania venosa	ventral	Z1-1	5.47508
	#8005	8005V a e	Magellania venosa	ventral	Z1-1	5.38773
	#8005	8005V a e	Magellania venosa	ventral	Z1-1	5.42547
	#8005	8005V a e	Magellania venosa	ventral	Z1-1	5.1525
	#8005	8005V a e	Magellania venosa	ventral	Z1-1	4.69887
	#8005	8005V a e	Magellania venosa	ventral	Z1-1	3.72507
	#8005	8005V a e	Magellania venosa	ventral	Z1-1	7.37443
	#8005	8005V a e	Magellania venosa	ventral	Z1-1	4.7043
	#8005	8005V a e	Magellania venosa	ventral	Z1-1	4.69561
	#8005	8005V a e	Magellania venosa	ventral	Z1-1	4.95362
	#8005	8005V a e	Magellania venosa	ventral	Z1-1	5.05152
	#8005	8005V a e	Magellania venosa	ventral	Z1-1	5.96045
	#8005	8005V a e	Magellania venosa	ventral	Z1-1	4.38551
	#8005	8005V a e	Magellania venosa	ventral	Z1-1	5.53716
	#8005	8005V a e	Magellania venosa	ventral	Z1-1	4.16475
	#8005	8005V a e	Magellania venosa	ventral	Z1-1	3.80769
	#8005	8005V a e	Magellania venosa	ventral	Z1-1	6.81575
	#8005	8005V a e	Magellania venosa	ventral	Z1-1	5.64664
	#8005	8005V a e	Magellania venosa	ventral	Z1-1	3.72644
	#8005	8005V a e	Magellania venosa	ventral	Z1-1	4.36219
	#8005	8005V a e	Magellania venosa	ventral	Z1-1	3.48741
	#8005	8005V a e	Magellania venosa	ventral	Z1-1	4.29738
	#8005	8005V a e	Magellania venosa	ventral	Z1-1	4.34461
	#8005	8005V a e	Magellania venosa	ventral	Z1-1	4.69561
	#8005	8005V a e	Magellania venosa	ventral	Z1-1	5.41418
	#8005	8005V a e	Magellania venosa	ventral	Z1-1	2.72914
	#8005	8005V a e	Magellania venosa	ventral	Z1-1	4.55554
	#8005	8005V a e	Magellania venosa	ventral	Z1-1	2.99133
	#8005	8005V a e	Magellania venosa	ventral	Z1-1	3.96006
	#8005	8005V a e	Magellania venosa	ventral	Z1-1	2.59696
	#8005	8005V a e	Magellania venosa	ventral	Z1-1	1.88702
	#8005	8005V a e	Magellania venosa	ventral	Z1-1	5.15053
	#8005	8005V a e	Magellania venosa	ventral	Z1-1	4.16108
	#8005	8005V a e	Magellania venosa	ventral	Z1-1	3.20856
	#8005	8005V a e	Magellania venosa	ventral	Z1-1	3.7141
	#8005	8005V a e	Magellania venosa	ventral	Z1-1	5.43956
	#8005	8005V a e	Magellania venosa	ventral	Z1-1	3.21015
	#8005	8005V a e	Magellania venosa	ventral	Z1-1	5.46949
	#8005	8005V a e	Magellania venosa	ventral	Z1-1	4.03282
	#8005	8005V a se	Magellania venosa	ventral	Z1-2	10.428
	#8005	8005V a se	Magellania venosa	ventral	Z1-2	6.36043
	#8005	8005V a se	Magellania venosa	ventral	Z1-2	9.35966
	#8005	8005V a se	Magellania venosa	ventral	Z1-2	4.74855
	#8005	8005V a se	Magellania venosa	ventral	Z1-2	7.00547
	#8005	8005V a se	Magellania venosa	ventral	Z1-2	5.55647
	#8005	8005V a se	Magellania venosa	ventral	Z1-2	5.03229
	#8005	8005V a se	Magellania venosa	ventral	Z1-2	5.6031
	#8005	8005V a se	Magellania venosa	ventral	Z1-2	5.16734
	#8005	8005V a se	Magellania venosa	ventral	Z1-2	6.26588
	#8005	8005V a se	Magellania venosa	ventral	Z1-2	5.82102
	#8005	8005V a se	Magellania venosa	ventral	Z1-2	7.22911
	#8005	8005V a se	Magellania venosa	ventral	Z1-2	5.05152
	#8005	8005V a se	Magellania venosa	ventral	Z1-2	4.68582
	#8005	8005V a se	Magellania venosa	ventral	Z1-2	5.19981
	#8005	8005V a se	Magellania venosa	ventral	Z1-2	5.61038
	#8005	8005V a se	Magellania venosa	ventral	Z1-2	5.12072
	#8005	8005V a se	Magellania venosa	ventral	Z1-2	6.18063
	#8005	8005V a se	Magellania venosa	ventral	Z1-2	6.28539
	#8005	8005V a se	Magellania venosa	ventral	Z1-2	5.58852
	#8005	8005V a se	Magellania venosa	ventral	Z1-2	5.31624
	#8005	8005V a se	Magellania venosa	ventral	Z1-2	5.02722
	#8005	8005V a se	Magellania venosa	ventral	Z1-2	4.66072
	#8005	8005V a se	Magellania venosa	ventral	Z1-2	5.96045
	#8005	8005V a se	Magellania venosa	ventral	Z1-2	5.05152
	#8005	8005V a se	Magellania venosa	ventral	Z1-2	5.16734
	#8005	8005V a se	Magellania venosa	ventral	Z1-2	4.46506
	#8005	8005V a se	Magellania venosa	ventral	Z1-2	5.43017
	#8005	8005V a se	Magellania venosa	ventral	Z1-2	3.70585
	#8005	8005V a se	Magellania venosa	ventral	Z1-2	5.21842
	#8005	8005V a se	Magellania venosa	ventral	Z1-2	5.08373
	#8005	8005V a se	Magellania venosa	ventral	Z1-2	4.73456
	#8005	8005V a se	Magellania venosa	ventral	Z1-2	4.74855
	#8005	8005V a se	Magellania venosa	ventral	Z1-2	4.80197
	#8005	8005V a se	Magellania venosa	ventral	Z1-2	5.27288
	#8005	8005V a se	Magellania venosa	ventral	Z1-2	5.98096
	#8005	8005V a se	Magellania venosa	ventral	Z1-2	2.94146
	#8005	8005V a se	Magellania venosa	ventral	Z1-2	5.88032
	#8005	8005V a se	Magellania venosa	ventral	Z1-2	6.66973
	#8005	8005V a se	Magellania venosa	ventral	Z1-2	3.87147
	#8005	8005V a se	Magellania venosa	ventral	Z1-2	5.27288
	#8005	8005V a se	Magellania venosa	ventral	Z1-2	3.38648
	#8005	8005V a se	Magellania venosa	ventral	Z1-2	5.66107
	#8005	8005V a se	Magellania venosa	ventral	Z1-2	5.60037
	#8005	8005V a se	Magellania venosa	ventral	Z1-2	3.35773
	#8005	8005V a se	Magellania venosa	ventral	Z1-2	5.11474
	#8005	8005V sa e	Magellania venosa	ventral	Z2-1	3.6209
	#8005	8005V sa e	Magellania venosa	ventral	Z2-1	4.859
	#8005	8005V sa e	Magellania venosa	ventral	Z2-1	3.94457
	#8005	8005V sa e	Magellania venosa	ventral	Z2-1	4.79133
	#8005	8005V sa e	Magellania venosa	ventral	Z2-1	4.4833
	#8005	8005V sa e	Magellania venosa	ventral	Z2-1	3.05378
	#8005	8005V sa e	Magellania venosa	ventral	Z2-1	5.24961
	#8005	8005V sa e	Magellania venosa	ventral	Z2-1	3.1362
	#8005	8005V sa e	Magellania venosa	ventral	Z2-1	3.80769
	#8005	8005V sa e	Magellania venosa	ventral	Z2-1	3.21015
	#8005	8005V sa e	Magellania venosa	ventral	Z2-1	4.27238
	#8005	8005V sa e	Magellania venosa	ventral	Z2-1	5.65115
	#8005	8005V sa e	Magellania venosa	ventral	Z2-1	4.65634
	#8005	8005V sa e	Magellania venosa	ventral	Z2-1	4.26282
	#8005	8005V sa e	Magellania venosa	ventral	Z2-1	3.70447
	#8005	8005V sa e	Magellania venosa	ventral	Z2-1	4.63547
	#8005	8005V sa e	Magellania venosa	ventral	Z2-1	2.06021
	#8005	8005V sa e	Magellania venosa	ventral	Z2-1	3.88594
	#8005	8005V sa e	Magellania venosa	ventral	Z2-1	6.39642
	#8005	8005V sa e	Magellania venosa	ventral	Z2-1	3.35773
	#8005	8005V sa e	Magellania venosa	ventral	Z2-1	5.68625
	#8005	8005V sa e	Magellania venosa	ventral	Z2-1	4.26282
	#8005	8005V sa e	Magellania venosa	ventral	Z2-1	4.75499
	#8005	8005V sa e	Magellania venosa	ventral	Z2-1	3.85033
	#8005	8005V sa e	Magellania venosa	ventral	Z2-1	4.0906
	#8005	8005V sa e	Magellania venosa	ventral	Z2-1	3.15727
	#8005	8005V sa e	Magellania venosa	ventral	Z2-1	3.03703
	#8005	8005V sa e	Magellania venosa	ventral	Z2-1	2.332
	#8005	8005V sa e	Magellania venosa	ventral	Z2-1	3.51364
	#8005	8005V sa e	Magellania venosa	ventral	Z2-1	3.04542
	#8005	8005V sa e	Magellania venosa	ventral	Z2-1	4.34461
	#8005	8005V sa e	Magellania venosa	ventral	Z2-1	5.43956
	#8005	8005V sa e	Magellania venosa	ventral	Z2-1	3.16212
	#8005	8005V sa e	Magellania venosa	ventral	Z2-1	3.56982
	#8005	8005V sa e	Magellania venosa	ventral	Z2-1	2.57526
	#8005	8005V sa e	Magellania venosa	ventral	Z2-1	3.48302
	#8005	8005V sa e	Magellania venosa	ventral	Z2-1	5.11075
	#8005	8005V sa e	Magellania venosa	ventral	Z2-1	3.05378
	#8005	8005V sa e	Magellania venosa	ventral	Z2-1	2.64369
	#8005	8005V sa e	Magellania venosa	ventral	Z2-1	5.06664
	#8005	8005V sa e	Magellania venosa	ventral	Z2-1	2.94493
	#8005	8005V sa e	Magellania venosa	ventral	Z2-1	6.45991
	#8005	8005V sa e	Magellania venosa	ventral	Z2-1	2.30339
	#8005	8005V sa e	Magellania venosa	ventral	Z2-1	4.02269
	#8005	8005V sa e	Magellania venosa	ventral	Z2-1	4.92469
	#8005	8005V sa e	Magellania venosa	ventral	Z2-1	4.07686
	#8005	8005V sa e	Magellania venosa	ventral	Z2-1	3.2339
	#8005	8005V sa e	Magellania venosa	ventral	Z2-1	5.05152
	#8005	8005V sa e	Magellania venosa	ventral	Z2-1	4.76464
	#8005	8005V sa e	Magellania venosa	ventral	Z2-1	3.80367
	#8005	8005V sa e	Magellania venosa	ventral	Z2-1	3.77405
	#8005	8005V sa e	Magellania venosa	ventral	Z2-1	3.84635
	#8005	8005V sa e	Magellania venosa	ventral	Z2-1	2.10188
	#8005	8005V sa e	Magellania venosa	ventral	Z2-1	3.70447
	#8005	8005V sa e	Magellania venosa	ventral	Z2-1	2.66674
	#8005	8005V sa e	Magellania venosa	ventral	Z2-1	5.38773
	#8005	8005V sa e	Magellania venosa	ventral	Z2-1	3.03703
	#8005	8005V sa e	Magellania venosa	ventral	Z2-1	5.05152
	#8005	8005V sa e	Magellania venosa	ventral	Z2-1	2.40098
	#8005	8005V sa e	Magellania venosa	ventral	Z2-1	3.38798
	#8005	8005V sa e	Magellania venosa	ventral	Z2-1	2.74406
	#8005	8005V sa e	Magellania venosa	ventral	Z2-1	3.96006
	#8005	8005V sa e	Magellania venosa	ventral	Z2-1	5.55647
	#8005	8005V sa e	Magellania venosa	ventral	Z2-1	4.05175
	#8005	8005V sa e	Magellania venosa	ventral	Z2-1	4.55554
	#8005	8005V sa se	Magellania venosa	ventral	Z2-2	5.8289
	#8005	8005V sa se	Magellania venosa	ventral	Z2-2	4.74855
	#8005	8005V sa se	Magellania venosa	ventral	Z2-2	6.30565
	#8005	8005V sa se	Magellania venosa	ventral	Z2-2	7.15748
	#8005	8005V sa se	Magellania venosa	ventral	Z2-2	5.24086
	#8005	8005V sa se	Magellania venosa	ventral	Z2-2	5.07268
	#8005	8005V sa se	Magellania venosa	ventral	Z2-2	6.39642
	#8005	8005V sa se	Magellania venosa	ventral	Z2-2	3.92902
	#8005	8005V sa se	Magellania venosa	ventral	Z2-2	6.60285
	#8005	8005V sa se	Magellania venosa	ventral	Z2-2	5.7885
	#8005	8005V sa se	Magellania venosa	ventral	Z2-2	4.98646
	#8005	8005V sa se	Magellania venosa	ventral	Z2-2	4.79026
	#8005	8005V sa se	Magellania venosa	ventral	Z2-2	3.83971
	#8005	8005V sa se	Magellania venosa	ventral	Z2-2	5.24183
	#8005	8005V sa se	Magellania venosa	ventral	Z2-2	5.30279
	#8005	8005V sa se	Magellania venosa	ventral	Z2-2	4.14141
	#8005	8005V sa se	Magellania venosa	ventral	Z2-2	4.56785
	#8005	8005V sa se	Magellania venosa	ventral	Z2-2	5.45548
	#8005	8005V sa se	Magellania venosa	ventral	Z2-2	4.29738
	#8005	8005V sa se	Magellania venosa	ventral	Z2-2	5.43956
	#8005	8005V sa se	Magellania venosa	ventral	Z2-2	4.40061
	#8005	8005V sa se	Magellania venosa	ventral	Z2-2	5.44799
	#8005	8005V sa se	Magellania venosa	ventral	Z2-2	5.44799
	#8005	8005V sa se	Magellania venosa	ventral	Z2-2	5.46762
	#8005	8005V sa se	Magellania venosa	ventral	Z2-2	3.09856
	#8005	8005V sa se	Magellania venosa	ventral	Z2-2	6.26344
	#8005	8005V sa se	Magellania venosa	ventral	Z2-2	4.28788
	#8005	8005V sa se	Magellania venosa	ventral	Z2-2	5.46762
	#8005	8005V sa se	Magellania venosa	ventral	Z2-2	4.57343
	#8005	8005V sa se	Magellania venosa	ventral	Z2-2	6.51887
	#8005	8005V sa se	Magellania venosa	ventral	Z2-2	5.55556
	#8005	8005V sa se	Magellania venosa	ventral	Z2-2	5.54728
	#8005	8005V sa se	Magellania venosa	ventral	Z2-2	5.78586
	#8005	8005V sa se	Magellania venosa	ventral	Z2-2	3.43434
	#8005	8005V sa se	Magellania venosa	ventral	Z2-2	4.73348
	#8005	8005V sa se	Magellania venosa	ventral	Z2-2	6.09167
	#8005	8005V sa se	Magellania venosa	ventral	Z2-2	3.77405
	#8005	8005V sa se	Magellania venosa	ventral	Z2-2	5.92612
	#8005	8005V sa se	Magellania venosa	ventral	Z2-2	3.11825
	#8005	8005V sa se	Magellania venosa	ventral	Z2-2	4.74855
	#8005	8005V sa se	Magellania venosa	ventral	Z2-2	6.00819
	#8005	8005V sa se	Magellania venosa	ventral	Z2-2	4.15249
	#8005	8005V sa se	Magellania venosa	ventral	Z2-2	4.67929
	#8005	8005V sa se	Magellania venosa	ventral	Z2-2	5.97328
	#8005	8005V sa se	Magellania venosa	ventral	Z2-2	3.52813
	#8005	8005V sa se	Magellania venosa	ventral	Z2-2	4.18553
	#8005	8005V sa se	Magellania venosa	ventral	Z2-2	3.74828
	#8005	8005V sa se	Magellania venosa	ventral	Z2-2	5.15053
	#8005	8005V sa se	Magellania venosa	ventral	Z2-2	3.67682
	#8005	8005V sa se	Magellania venosa	ventral	Z2-2	4.60677
	#8005	8005V sa se	Magellania venosa	ventral	Z2-2	6.4433
	#8005	8005V sa se	Magellania venosa	ventral	Z2-2	2.94493
	#8005	8005V sa se	Magellania venosa	ventral	Z2-2	5.65115
	#8005	8005V sa se	Magellania venosa	ventral	Z2-2	4.17576
	#8005	8005V sa se	Magellania venosa	ventral	Z2-2	5.09976
	#8005	8005V sa se	Magellania venosa	ventral	Z2-2	6.04459
	#8005	8005V sa se	Magellania venosa	ventral	Z2-2	5.28737
	#8005	8005V sa se	Magellania venosa	ventral	Z2-2	4.96596
	#8005	8005V sa se	Magellania venosa	ventral	Z2-2	4.08561
	#9006	9006D 2sa e	Magellania venosa	dorsal	Z6-1	4.27398
	#9006	9006D 2sa e	Magellania venosa	dorsal	Z6-1	4.24521
	#9006	9006D 2sa e	Magellania venosa	dorsal	Z6-1	3.44579
	#9006	9006D 2sa e	Magellania venosa	dorsal	Z6-1	2.78829
	#9006	9006D 2sa e	Magellania venosa	dorsal	Z6-1	2.35991
	#9006	9006D 2sa e	Magellania venosa	dorsal	Z6-1	3.97419
	#9006	9006D 2sa e	Magellania venosa	dorsal	Z6-1	4.20567
	#9006	9006D 2sa e	Magellania venosa	dorsal	Z6-1	2.7521
	#9006	9006D 2sa e	Magellania venosa	dorsal	Z6-1	4.09837
	#9006	9006D 2sa e	Magellania venosa	dorsal	Z6-1	3.10577
	#9006	9006D 2sa e	Magellania venosa	dorsal	Z6-1	3.48436
	#9006	9006D 2sa e	Magellania venosa	dorsal	Z6-1	3.40678
	#9006	9006D 2sa e	Magellania venosa	dorsal	Z6-1	4.01878
	#9006	9006D 2sa e	Magellania venosa	dorsal	Z6-1	3.51302
	#9006	9006D 2sa e	Magellania venosa	dorsal	Z6-1	3.04419
	#9006	9006D 2sa e	Magellania venosa	dorsal	Z6-1	3.04419
	#9006	9006D 2sa e	Magellania venosa	dorsal	Z6-1	4.27398
	#9006	9006D 2sa e	Magellania venosa	dorsal	Z6-1	2.97386
	#9006	9006D 2sa e	Magellania venosa	dorsal	Z6-1	3.04419
	#9006	9006D 2sa e	Magellania venosa	dorsal	Z6-1	3.40351
	#9006	9006D 2sa e	Magellania venosa	dorsal	Z6-1	2.6066
	#9006	9006D 2sa e	Magellania venosa	dorsal	Z6-1	3.80524
	#9006	9006D 2sa e	Magellania venosa	dorsal	Z6-1	3.659
	#9006	9006D 2sa e	Magellania venosa	dorsal	Z6-1	2.97386
	#9006	9006D 2sa e	Magellania venosa	dorsal	Z6-1	3.74029
	#9006	9006D 2sa e	Magellania venosa	dorsal	Z6-1	3.33741
	#9006	9006D 2sa e	Magellania venosa	dorsal	Z6-1	3.44579
	#9006	9006D 2sa e	Magellania venosa	dorsal	Z6-1	3.27679
	#9006	9006D 2sa e	Magellania venosa	dorsal	Z6-1	4.53937
	#9006	9006D 2sa e	Magellania venosa	dorsal	Z6-1	3.6863
	#9006	9006D 2sa e	Magellania venosa	dorsal	Z6-1	4.47761
	#9006	9006D 2sa e	Magellania venosa	dorsal	Z6-1	4.45267
	#9006	9006D 2sa e	Magellania venosa	dorsal	Z6-1	4.10651
	#9006	9006D 2sa e	Magellania venosa	dorsal	Z6-1	3.52251
	#9006	9006D 2sa e	Magellania venosa	dorsal	Z6-1	5.00612
	#9006	9006D 2sa e	Magellania venosa	dorsal	Z6-1	3.30387
	#9006	9006D 2sa e	Magellania venosa	dorsal	Z6-1	2.89798
	#9006	9006D 2sa e	Magellania venosa	dorsal	Z6-1	3.43608
	#9006	9006D 2sa e	Magellania venosa	dorsal	Z6-1	2.93237
	#9006	9006D 2sa e	Magellania venosa	dorsal	Z6-1	4.42003
	#9006	9006D 2sa e	Magellania venosa	dorsal	Z6-1	3.43608
	#9006	9006D 2sa e	Magellania venosa	dorsal	Z6-1	3.91773
	#9006	9006D 2sa e	Magellania venosa	dorsal	Z6-1	3.04419
	#9006	9006D 2sa e	Magellania venosa	dorsal	Z6-1	3.46191
	#9006	9006D 2sa e	Magellania venosa	dorsal	Z6-1	3.07694
	#9006	9006D 2sa e	Magellania venosa	dorsal	Z6-1	4.74336
	#9006	9006D 2sa e	Magellania venosa	dorsal	Z6-1	4.63649
	#9006	9006D 2sa e	Magellania venosa	dorsal	Z6-1	3.51302
	#9006	9006D 2sa e	Magellania venosa	dorsal	Z6-1	4.06014
	#9006	9006D 2sa e	Magellania venosa	dorsal	Z6-1	2.31704
	#9006	9006D 2sa e	Magellania venosa	dorsal	Z6-1	5.1009
	#9006	9006D 2sa e	Magellania venosa	dorsal	Z6-1	3.56026
	#9006	9006D 2sa e	Magellania venosa	dorsal	Z6-1	3.52251
	#9006	9006D 2sa e	Magellania venosa	dorsal	Z6-1	4.51724
	#9006	9006D 2sa e	Magellania venosa	dorsal	Z6-1	3.6315
	#9006	9006D 2sa e	Magellania venosa	dorsal	Z6-1	3.36732
	#9006	9006D 2sa se	Magellania venosa	dorsal	Z6-2	5.85143
	#9006	9006D 2sa se	Magellania venosa	dorsal	Z6-2	6.48009
	#9006	9006D 2sa se	Magellania venosa	dorsal	Z6-2	4.98829
	#9006	9006D 2sa se	Magellania venosa	dorsal	Z6-2	5.19823
	#9006	9006D 2sa se	Magellania venosa	dorsal	Z6-2	3.40351
	#9006	9006D 2sa se	Magellania venosa	dorsal	Z6-2	4.16308
	#9006	9006D 2sa se	Magellania venosa	dorsal	Z6-2	2.89798
	#9006	9006D 2sa se	Magellania venosa	dorsal	Z6-2	3.22195
	#9006	9006D 2sa se	Magellania venosa	dorsal	Z6-2	4.07383
	#9006	9006D 2sa se	Magellania venosa	dorsal	Z6-2	3.80524
	#9006	9006D 2sa se	Magellania venosa	dorsal	Z6-2	3.04419
	#9006	9006D 2sa se	Magellania venosa	dorsal	Z6-2	3.40351
	#9006	9006D 2sa se	Magellania venosa	dorsal	Z6-2	3.80524
	#9006	9006D 2sa se	Magellania venosa	dorsal	Z6-2	4.07383
	#9006	9006D 2sa se	Magellania venosa	dorsal	Z6-2	4.35913
	#9006	9006D 2sa se	Magellania venosa	dorsal	Z6-2	4.59789
	#9006	9006D 2sa se	Magellania venosa	dorsal	Z6-2	3.43608
	#9006	9006D 2sa se	Magellania venosa	dorsal	Z6-2	4.38968
	#9006	9006D 2sa se	Magellania venosa	dorsal	Z6-2	3.43608
	#9006	9006D 2sa se	Magellania venosa	dorsal	Z6-2	3.87485
	#9006	9006D 2sa se	Magellania venosa	dorsal	Z6-2	4.92763
	#9006	9006D 2sa se	Magellania venosa	dorsal	Z6-2	3.73134
	#9006	9006D 2sa se	Magellania venosa	dorsal	Z6-2	6.0092
	#9006	9006D 2sa se	Magellania venosa	dorsal	Z6-2	3.69233
	#9006	9006D 2sa se	Magellania venosa	dorsal	Z6-2	3.33741
	#9006	9006D 2sa se	Magellania venosa	dorsal	Z6-2	4.42003
	#9006	9006D 2sa se	Magellania venosa	dorsal	Z6-2	4.36934
	#9006	9006D 2sa se	Magellania venosa	dorsal	Z6-2	3.9517
	#9006	9006D 2sa se	Magellania venosa	dorsal	Z6-2	5.61837
	#9006	9006D 2sa se	Magellania venosa	dorsal	Z6-2	4.18177
	#9006	9006D 2sa se	Magellania venosa	dorsal	Z6-2	4.88906
	#9006	9006D 2sa se	Magellania venosa	dorsal	Z6-2	4.74336
	#9006	9006D 2sa se	Magellania venosa	dorsal	Z6-2	3.77585
	#9006	9006D 2sa se	Magellania venosa	dorsal	Z6-2	3.80524
	#9006	9006D 2sa se	Magellania venosa	dorsal	Z6-2	2.98507
	#9006	9006D 2sa se	Magellania venosa	dorsal	Z6-2	3.51302
	#9006	9006D 2sa se	Magellania venosa	dorsal	Z6-2	3.22885
	#9006	9006D 2sa se	Magellania venosa	dorsal	Z6-2	4.24784
	#9006	9006D 2sa se	Magellania venosa	dorsal	Z6-2	5.00612
	#9006	9006D 2sa se	Magellania venosa	dorsal	Z6-2	3.659
	#9006	9006D 2sa se	Magellania venosa	dorsal	Z6-2	4.35913
	#9006	9006D 2sa se	Magellania venosa	dorsal	Z6-2	4.147
	#9006	9006D 2sa se	Magellania venosa	dorsal	Z6-2	4.05465
	#9006	9006D 2sa se	Magellania venosa	dorsal	Z6-2	4.90952
	#9006	9006D 2sa se	Magellania venosa	dorsal	Z6-2	5.47377
	#9006	9006D 2sa se	Magellania venosa	dorsal	Z6-2	5.24304
	#9006	9006D 2sa se	Magellania venosa	dorsal	Z6-2	4.71273
	#9006	9006D 2sa se	Magellania venosa	dorsal	Z6-2	5.3586
	#9006	9006D 2sa se	Magellania venosa	dorsal	Z6-2	5.01723
	#9006	9006D 2sa se	Magellania venosa	dorsal	Z6-2	4.45267
	#9006	9006D 2sa se	Magellania venosa	dorsal	Z6-2	5.21321
	#9006	9006D 2sa se	Magellania venosa	dorsal	Z6-2	5.54051
	#9006	9006D a e	Magellania venosa	dorsal	Z4-1	3.50637
	#9006	9006D a e	Magellania venosa	dorsal	Z4-1	4.83373
	#9006	9006D a e	Magellania venosa	dorsal	Z4-1	3.51364
	#9006	9006D a e	Magellania venosa	dorsal	Z4-1	3.89904
	#9006	9006D a e	Magellania venosa	dorsal	Z4-1	3.84635
	#9006	9006D a e	Magellania venosa	dorsal	Z4-1	4.24843
	#9006	9006D a e	Magellania venosa	dorsal	Z4-1	2.8011
	#9006	9006D a e	Magellania venosa	dorsal	Z4-1	4.28073
	#9006	9006D a e	Magellania venosa	dorsal	Z4-1	4.77426
	#9006	9006D a e	Magellania venosa	dorsal	Z4-1	2.71978
	#9006	9006D a e	Magellania venosa	dorsal	Z4-1	3.41796
	#9006	9006D a e	Magellania venosa	dorsal	Z4-1	4.98646
	#9006	9006D a e	Magellania venosa	dorsal	Z4-1	3.3226
	#9006	9006D a e	Magellania venosa	dorsal	Z4-1	3.18942
	#9006	9006D a e	Magellania venosa	dorsal	Z4-1	3.09031
	#9006	9006D a e	Magellania venosa	dorsal	Z4-1	3.83971
	#9006	9006D a e	Magellania venosa	dorsal	Z4-1	4.89039
	#9006	9006D a e	Magellania venosa	dorsal	Z4-1	4.02269
	#9006	9006D a e	Magellania venosa	dorsal	Z4-1	4.11299
	#9006	9006D a e	Magellania venosa	dorsal	Z4-1	4.80197
	#9006	9006D a e	Magellania venosa	dorsal	Z4-1	3.17017
	#9006	9006D a e	Magellania venosa	dorsal	Z4-1	3.0721
	#9006	9006D a e	Magellania venosa	dorsal	Z4-1	2.87125
	#9006	9006D a se	Magellania venosa	dorsal	Z4-2	5.93902
	#9006	9006D a se	Magellania venosa	dorsal	Z4-2	5.19196
	#9006	9006D a se	Magellania venosa	dorsal	Z4-2	4.24843
	#9006	9006D a se	Magellania venosa	dorsal	Z4-2	5.30279
	#9006	9006D a se	Magellania venosa	dorsal	Z4-2	4.90393
	#9006	9006D a se	Magellania venosa	dorsal	Z4-2	4.22918
	#9006	9006D a se	Magellania venosa	dorsal	Z4-2	3.51799
	#9006	9006D a se	Magellania venosa	dorsal	Z4-2	4.16475
	#9006	9006D a se	Magellania venosa	dorsal	Z4-2	4.93711
	#9006	9006D a se	Magellania venosa	dorsal	Z4-2	4.47419
	#9006	9006D a se	Magellania venosa	dorsal	Z4-2	6.55399
	#9006	9006D a se	Magellania venosa	dorsal	Z4-2	4.38551
	#9006	9006D a se	Magellania venosa	dorsal	Z4-2	3.88068
	#9006	9006D a se	Magellania venosa	dorsal	Z4-2	5.03229
	#9006	9006D a se	Magellania venosa	dorsal	Z4-2	3.57125
	#9006	9006D a se	Magellania venosa	dorsal	Z4-2	4.79984
	#9006	9006D a se	Magellania venosa	dorsal	Z4-2	5.57114
	#9006	9006D a se	Magellania venosa	dorsal	Z4-2	5.46296
	#9006	9006D a se	Magellania venosa	dorsal	Z4-2	4.39016
	#9006	9006D a se	Magellania venosa	dorsal	Z4-2	4.24843
	#9006	9006D a se	Magellania venosa	dorsal	Z4-2	3.80233
	#9006	9006D a se	Magellania venosa	dorsal	Z4-2	5.07569
	#9006	9006D a se	Magellania venosa	dorsal	Z4-2	3.90297
	#9006	9006D a se	Magellania venosa	dorsal	Z4-2	5.2999
	#9006	9006D a se	Magellania venosa	dorsal	Z4-2	6.24713
	#9006	9006D a se	Magellania venosa	dorsal	Z4-2	5.87684
	#9006	9006D a se	Magellania venosa	dorsal	Z4-2	4.85794
	#9006	9006D a se	Magellania venosa	dorsal	Z4-2	5.32295
	#9006	9006D a se	Magellania venosa	dorsal	Z4-2	3.14594
	#9006	9006D a se	Magellania venosa	dorsal	Z4-2	3.26061
	#9006	9006D a se	Magellania venosa	dorsal	Z4-2	3.86619
	#9006	9006D a se	Magellania venosa	dorsal	Z4-2	3.2339
	#9006	9006D a se	Magellania venosa	dorsal	Z4-2	3.45508
	#9006	9006D sa e	Magellania venosa	dorsal	Z5-1	4.60677
	#9006	9006D sa e	Magellania venosa	dorsal	Z5-1	4.00999
	#9006	9006D sa e	Magellania venosa	dorsal	Z5-1	3.3318
	#9006	9006D sa e	Magellania venosa	dorsal	Z5-1	3.03871
	#9006	9006D sa e	Magellania venosa	dorsal	Z5-1	3.2465
	#9006	9006D sa e	Magellania venosa	dorsal	Z5-1	3.13294
	#9006	9006D sa e	Magellania venosa	dorsal	Z5-1	4.24363
	#9006	9006D sa e	Magellania venosa	dorsal	Z5-1	2.54337
	#9006	9006D sa e	Magellania venosa	dorsal	Z5-1	3.72507
	#9006	9006D sa e	Magellania venosa	dorsal	Z5-1	2.89249
	#9006	9006D sa e	Magellania venosa	dorsal	Z5-1	3.35773
	#9006	9006D sa e	Magellania venosa	dorsal	Z5-1	3.16373
	#9006	9006D sa e	Magellania venosa	dorsal	Z5-1	3.3318
	#9006	9006D sa e	Magellania venosa	dorsal	Z5-1	5.19196
	#9006	9006D sa e	Magellania venosa	dorsal	Z5-1	5.17621
	#9006	9006D sa e	Magellania venosa	dorsal	Z5-1	4.63437
	#9006	9006D sa e	Magellania venosa	dorsal	Z5-1	3.8437
	#9006	9006D sa e	Magellania venosa	dorsal	Z5-1	4.29738
	#9006	9006D sa e	Magellania venosa	dorsal	Z5-1	4.04545
	#9006	9006D sa e	Magellania venosa	dorsal	Z5-1	2.94493
	#9006	9006D sa e	Magellania venosa	dorsal	Z5-1	3.74964
	#9006	9006D sa e	Magellania venosa	dorsal	Z5-1	3.21015
	#9006	9006D sa e	Magellania venosa	dorsal	Z5-1	3.80233
	#9006	9006D sa e	Magellania venosa	dorsal	Z5-1	2.74406
	#9006	9006D sa se	Magellania venosa	dorsal	Z5-2	4.33873
	#9006	9006D sa se	Magellania venosa	dorsal	Z5-2	5.27288
	#9006	9006D sa se	Magellania venosa	dorsal	Z5-2	4.36219
	#9006	9006D sa se	Magellania venosa	dorsal	Z5-2	5.28545
	#9006	9006D sa se	Magellania venosa	dorsal	Z5-2	4.4833
	#9006	9006D sa se	Magellania venosa	dorsal	Z5-2	3.29794
	#9006	9006D sa se	Magellania venosa	dorsal	Z5-2	4.62666
	#9006	9006D sa se	Magellania venosa	dorsal	Z5-2	2.7938
	#9006	9006D sa se	Magellania venosa	dorsal	Z5-2	3.45508
	#9006	9006D sa se	Magellania venosa	dorsal	Z5-2	5.24961
	#9006	9006D sa se	Magellania venosa	dorsal	Z5-2	6.10255
	#9006	9006D sa se	Magellania venosa	dorsal	Z5-2	5.35449
	#9006	9006D sa se	Magellania venosa	dorsal	Z5-2	4.76464
	#9006	9006D sa se	Magellania venosa	dorsal	Z5-2	4.02269
	#9006	9006D sa se	Magellania venosa	dorsal	Z5-2	7.47884
	#9006	9006D sa se	Magellania venosa	dorsal	Z5-2	4.12166
	#9006	9006D sa se	Magellania venosa	dorsal	Z5-2	4.28788
	#9006	9006D sa se	Magellania venosa	dorsal	Z5-2	5.27288
	#9006	9006D sa se	Magellania venosa	dorsal	Z5-2	4.48558
	#9006	9006D sa se	Magellania venosa	dorsal	Z5-2	4.97417
	#9006	9006D sa se	Magellania venosa	dorsal	Z5-2	3.19422
	#9006	9006D sa se	Magellania venosa	dorsal	Z5-2	3.3318
	#9006	9006D sa se	Magellania venosa	dorsal	Z5-2	6.71622
	#9006	9006D sa se	Magellania venosa	dorsal	Z5-2	4.92573
	#9006	9006V 2sa e	Magellania venosa	ventral	Z3-1	5.0039
	#9006	9006V 2sa e	Magellania venosa	ventral	Z3-1	3.30387
	#9006	9006V 2sa e	Magellania venosa	ventral	Z3-1	4.76912
	#9006	9006V 2sa e	Magellania venosa	ventral	Z3-1	3.19068
	#9006	9006V 2sa e	Magellania venosa	ventral	Z3-1	5.05043
	#9006	9006V 2sa e	Magellania venosa	ventral	Z3-1	4.30514
	#9006	9006V 2sa e	Magellania venosa	ventral	Z3-1	2.7521
	#9006	9006V 2sa e	Magellania venosa	ventral	Z3-1	3.64375
	#9006	9006V 2sa e	Magellania venosa	ventral	Z3-1	4.30772
	#9006	9006V 2sa e	Magellania venosa	ventral	Z3-1	3.43608
	#9006	9006V 2sa e	Magellania venosa	ventral	Z3-1	3.19417
	#9006	9006V 2sa e	Magellania venosa	ventral	Z3-1	2.65739
	#9006	9006V 2sa e	Magellania venosa	ventral	Z3-1	5.55256
	#9006	9006V 2sa e	Magellania venosa	ventral	Z3-1	4.71273
	#9006	9006V 2sa e	Magellania venosa	ventral	Z3-1	3.80524
	#9006	9006V 2sa e	Magellania venosa	ventral	Z3-1	2.35991
	#9006	9006V 2sa e	Magellania venosa	ventral	Z3-1	2.31704
	#9006	9006V 2sa e	Magellania venosa	ventral	Z3-1	3.11651
	#9006	9006V 2sa e	Magellania venosa	ventral	Z3-1	3.82276
	#9006	9006V 2sa e	Magellania venosa	ventral	Z3-1	3.98259
	#9006	9006V 2sa e	Magellania venosa	ventral	Z3-1	2.78829
	#9006	9006V 2sa e	Magellania venosa	ventral	Z3-1	3.11651
	#9006	9006V 2sa e	Magellania venosa	ventral	Z3-1	3.9517
	#9006	9006V 2sa e	Magellania venosa	ventral	Z3-1	3.22885
	#9006	9006V 2sa e	Magellania venosa	ventral	Z3-1	3.81401
	#9006	9006V 2sa e	Magellania venosa	ventral	Z3-1	3.85179
	#9006	9006V 2sa e	Magellania venosa	ventral	Z3-1	2.93237
	#9006	9006V 2sa e	Magellania venosa	ventral	Z3-1	3.80524
	#9006	9006V 2sa e	Magellania venosa	ventral	Z3-1	4.22153
	#9006	9006V 2sa e	Magellania venosa	ventral	Z3-1	2.93237
	#9006	9006V 2sa e	Magellania venosa	ventral	Z3-1	3.56026
	#9006	9006V 2sa e	Magellania venosa	ventral	Z3-1	4.38968
	#9006	9006V 2sa e	Magellania venosa	ventral	Z3-1	4.53937
	#9006	9006V 2sa e	Magellania venosa	ventral	Z3-1	3.25975
	#9006	9006V 2sa e	Magellania venosa	ventral	Z3-1	3.80524
	#9006	9006V 2sa e	Magellania venosa	ventral	Z3-1	3.36732
	#9006	9006V 2sa e	Magellania venosa	ventral	Z3-1	5.03496
	#9006	9006V 2sa e	Magellania venosa	ventral	Z3-1	4.83407
	#9006	9006V 2sa se	Magellania venosa	ventral	Z3-2	4.47761
	#9006	9006V 2sa se	Magellania venosa	ventral	Z3-2	5.31477
	#9006	9006V 2sa se	Magellania venosa	ventral	Z3-2	5.71273
	#9006	9006V 2sa se	Magellania venosa	ventral	Z3-2	5.2494
	#9006	9006V 2sa se	Magellania venosa	ventral	Z3-2	3.48117
	#9006	9006V 2sa se	Magellania venosa	ventral	Z3-2	2.56786
	#9006	9006V 2sa se	Magellania venosa	ventral	Z3-2	4.98829
	#9006	9006V 2sa se	Magellania venosa	ventral	Z3-2	3.81401
	#9006	9006V 2sa se	Magellania venosa	ventral	Z3-2	4.38968
	#9006	9006V 2sa se	Magellania venosa	ventral	Z3-2	5.47377
	#9006	9006V 2sa se	Magellania venosa	ventral	Z3-2	4.42003
	#9006	9006V 2sa se	Magellania venosa	ventral	Z3-2	4.87308
	#9006	9006V 2sa se	Magellania venosa	ventral	Z3-2	3.5883
	#9006	9006V 2sa se	Magellania venosa	ventral	Z3-2	5.65
	#9006	9006V 2sa se	Magellania venosa	ventral	Z3-2	3.8373
	#9006	9006V 2sa se	Magellania venosa	ventral	Z3-2	5.07463
	#9006	9006V 2sa se	Magellania venosa	ventral	Z3-2	3.98259
	#9006	9006V 2sa se	Magellania venosa	ventral	Z3-2	5.00612
	#9006	9006V 2sa se	Magellania venosa	ventral	Z3-2	3.22195
	#9006	9006V 2sa se	Magellania venosa	ventral	Z3-2	7.76263
	#9006	9006V 2sa se	Magellania venosa	ventral	Z3-2	5.43292
	#9006	9006V 2sa se	Magellania venosa	ventral	Z3-2	4.98829
	#9006	9006V 2sa se	Magellania venosa	ventral	Z3-2	6.48009
	#9006	9006V 2sa se	Magellania venosa	ventral	Z3-2	4.53201
	#9006	9006V 2sa se	Magellania venosa	ventral	Z3-2	4.68429
	#9006	9006V 2sa se	Magellania venosa	ventral	Z3-2	5.76127
	#9006	9006V 2sa se	Magellania venosa	ventral	Z3-2	3.87485
	#9006	9006V 2sa se	Magellania venosa	ventral	Z3-2	6.66481
	#9006	9006V 2sa se	Magellania venosa	ventral	Z3-2	3.6315
	#9006	9006V 2sa se	Magellania venosa	ventral	Z3-2	5.13572
	#9006	9006V 2sa se	Magellania venosa	ventral	Z3-2	4.74336
	#9006	9006V 2sa se	Magellania venosa	ventral	Z3-2	3.9517
	#9006	9006V 2sa se	Magellania venosa	ventral	Z3-2	5.12921
	#9006	9006V 2sa se	Magellania venosa	ventral	Z3-2	3.82567
	#9006	9006V 2sa se	Magellania venosa	ventral	Z3-2	3.19417
	#9006	9006V 2sa se	Magellania venosa	ventral	Z3-2	4.14968
	#9006	9006V 2sa se	Magellania venosa	ventral	Z3-2	4.68666
	#9006	9006V 2sa se	Magellania venosa	ventral	Z3-2	5.00612
	#9006	9006V 2sa se	Magellania venosa	ventral	Z3-2	4.74101
	#9006	9006V 2sa se	Magellania venosa	ventral	Z3-2	3.659
	#9006	9006V a e	Magellania venosa	ventral	Z1-1	6.73821
	#9006	9006V a e	Magellania venosa	ventral	Z1-1	3.79562
	#9006	9006V a e	Magellania venosa	ventral	Z1-1	3.85695
	#9006	9006V a e	Magellania venosa	ventral	Z1-1	6.16493
	#9006	9006V a e	Magellania venosa	ventral	Z1-1	5.69701
	#9006	9006V a e	Magellania venosa	ventral	Z1-1	5.47508
	#9006	9006V a e	Magellania venosa	ventral	Z1-1	4.44903
	#9006	9006V a e	Magellania venosa	ventral	Z1-1	5.88465
	#9006	9006V a e	Magellania venosa	ventral	Z1-1	2.94146
	#9006	9006V a e	Magellania venosa	ventral	Z1-1	3.09197
	#9006	9006V a e	Magellania venosa	ventral	Z1-1	3.93032
	#9006	9006V a e	Magellania venosa	ventral	Z1-1	3.93421
	#9006	9006V a e	Magellania venosa	ventral	Z1-1	3.48302
	#9006	9006V a e	Magellania venosa	ventral	Z1-1	4.86529
	#9006	9006V a e	Magellania venosa	ventral	Z1-1	5.66017
	#9006	9006V a e	Magellania venosa	ventral	Z1-1	3.94457
	#9006	9006V a e	Magellania venosa	ventral	Z1-1	5.36115
	#9006	9006V a e	Magellania venosa	ventral	Z1-1	4.92573
	#9006	9006V a e	Magellania venosa	ventral	Z1-1	2.857
	#9006	9006V a e	Magellania venosa	ventral	Z1-1	5.43017
	#9006	9006V a e	Magellania venosa	ventral	Z1-1	4.20983
	#9006	9006V a e	Magellania venosa	ventral	Z1-1	3.37591
	#9006	9006V a e	Magellania venosa	ventral	Z1-1	4.05175
	#9006	9006V a e	Magellania venosa	ventral	Z1-1	3.03703
	#9006	9006V a e	Magellania venosa	ventral	Z1-1	3.80233
	#9006	9006V a e	Magellania venosa	ventral	Z1-1	4.27238
	#9006	9006V a se	Magellania venosa	ventral	Z1-2	3.28865
	#9006	9006V a se	Magellania venosa	ventral	Z1-2	5.36876
	#9006	9006V a se	Magellania venosa	ventral	Z1-2	4.53984
	#9006	9006V a se	Magellania venosa	ventral	Z1-2	6.60285
	#9006	9006V a se	Magellania venosa	ventral	Z1-2	3.26374
	#9006	9006V a se	Magellania venosa	ventral	Z1-2	3.59687
	#9006	9006V a se	Magellania venosa	ventral	Z1-2	4.02269
	#9006	9006V a se	Magellania venosa	ventral	Z1-2	4.07686
	#9006	9006V a se	Magellania venosa	ventral	Z1-2	3.13294
	#9006	9006V a se	Magellania venosa	ventral	Z1-2	8.3814
	#9006	9006V a se	Magellania venosa	ventral	Z1-2	4.50487
	#9006	9006V a se	Magellania venosa	ventral	Z1-2	2.75889
	#9006	9006V a se	Magellania venosa	ventral	Z1-2	4.12661
	#9006	9006V a se	Magellania venosa	ventral	Z1-2	4.37153
	#9006	9006V a se	Magellania venosa	ventral	Z1-2	6.55399
	#9006	9006V a se	Magellania venosa	ventral	Z1-2	4.88622
	#9006	9006V a se	Magellania venosa	ventral	Z1-2	4.76464
	#9006	9006V a se	Magellania venosa	ventral	Z1-2	4.70863
	#9006	9006V a se	Magellania venosa	ventral	Z1-2	5.43581
	#9006	9006V a se	Magellania venosa	ventral	Z1-2	4.16475
	#9006	9006V a se	Magellania venosa	ventral	Z1-2	4.64317
	#9006	9006V a se	Magellania venosa	ventral	Z1-2	4.46277
	#9006	9006V a se	Magellania venosa	ventral	Z1-2	4.8369
	#9006	9006V a se	Magellania venosa	ventral	Z1-2	3.51799
	#9006	9006V a se	Magellania venosa	ventral	Z1-2	6.96384
	#9006	9006V a se	Magellania venosa	ventral	Z1-2	5.47788
	#9006	9006V sa e	Magellania venosa	ventral	Z2-1	3.43583
	#9006	9006V sa e	Magellania venosa	ventral	Z2-1	3.93032
	#9006	9006V sa e	Magellania venosa	ventral	Z2-1	5.14458
	#9006	9006V sa e	Magellania venosa	ventral	Z2-1	4.36102
	#9006	9006V sa e	Magellania venosa	ventral	Z2-1	2.75889
	#9006	9006V sa e	Magellania venosa	ventral	Z2-1	4.41219
	#9006	9006V sa e	Magellania venosa	ventral	Z2-1	3.52813
	#9006	9006V sa e	Magellania venosa	ventral	Z2-1	3.1362
	#9006	9006V sa e	Magellania venosa	ventral	Z2-1	3.88725
	#9006	9006V sa e	Magellania venosa	ventral	Z2-1	3.75372
	#9006	9006V sa e	Magellania venosa	ventral	Z2-1	3.58693
	#9006	9006V sa e	Magellania venosa	ventral	Z2-1	2.84447
	#9006	9006V sa e	Magellania venosa	ventral	Z2-1	3.37591
	#9006	9006V sa e	Magellania venosa	ventral	Z2-1	4.60788
	#9006	9006V sa e	Magellania venosa	ventral	Z2-1	3.48302
	#9006	9006V sa e	Magellania venosa	ventral	Z2-1	3.21015
	#9006	9006V sa e	Magellania venosa	ventral	Z2-1	4.57343
	#9006	9006V sa e	Magellania venosa	ventral	Z2-1	3.67127
	#9006	9006V sa e	Magellania venosa	ventral	Z2-1	4.15249
	#9006	9006V sa e	Magellania venosa	ventral	Z2-1	4.44903
	#9006	9006V sa e	Magellania venosa	ventral	Z2-1	4.2855
	#9006	9006V sa e	Magellania venosa	ventral	Z2-1	4.94124
	#9006	9006V sa e	Magellania venosa	ventral	Z2-1	4.36102
	#9006	9006V sa e	Magellania venosa	ventral	Z2-1	4.7892
	#9006	9006V sa e	Magellania venosa	ventral	Z2-1	4.30687
	#9006	9006V sa e	Magellania venosa	ventral	Z2-1	3.3638
	#9006	9006V sa e	Magellania venosa	ventral	Z2-1	3.50637
	#9006	9006V sa e	Magellania venosa	ventral	Z2-1	5.22624
	#9006	9006V sa e	Magellania venosa	ventral	Z2-1	5.29605
	#9006	9006V sa e	Magellania venosa	ventral	Z2-1	4.20134
	#9006	9006V sa e	Magellania venosa	ventral	Z2-1	3.45508
	#9006	9006V sa e	Magellania venosa	ventral	Z2-1	4.59124
	#9006	9006V sa e	Magellania venosa	ventral	Z2-1	3.15566
	#9006	9006V sa e	Magellania venosa	ventral	Z2-1	2.94493
	#9006	9006V sa e	Magellania venosa	ventral	Z2-1	3.04542
	#9006	9006V sa e	Magellania venosa	ventral	Z2-1	3.69896
	#9006	9006V sa e	Magellania venosa	ventral	Z2-1	3.20856
	#9006	9006V sa e	Magellania venosa	ventral	Z2-1	4.73133
	#9006	9006V sa e	Magellania venosa	ventral	Z2-1	4.42719
	#9006	9006V sa e	Magellania venosa	ventral	Z2-1	4.02522
	#9006	9006V sa e	Magellania venosa	ventral	Z2-1	3.45212
	#9006	9006V sa e	Magellania venosa	ventral	Z2-1	3.45508
	#9006	9006V sa e	Magellania venosa	ventral	Z2-1	3.09031
	#9006	9006V sa e	Magellania venosa	ventral	Z2-1	3.95103
	#9006	9006V sa e	Magellania venosa	ventral	Z2-1	3.99597
	#9006	9006V sa e	Magellania venosa	ventral	Z2-1	2.89249
	#9006	9006V sa e	Magellania venosa	ventral	Z2-1	3.43583
	#9006	9006V sa e	Magellania venosa	ventral	Z2-1	3.58266
	#9006	9006V sa e	Magellania venosa	ventral	Z2-1	3.95103
	#9006	9006V sa e	Magellania venosa	ventral	Z2-1	3.84635
	#9006	9006V sa e	Magellania venosa	ventral	Z2-1	2.7938
	#9006	9006V sa e	Magellania venosa	ventral	Z2-1	3.51364
	#9006	9006V sa e	Magellania venosa	ventral	Z2-1	2.97251
	#9006	9006V sa se	Magellania venosa	ventral	Z2-2	4.12166
	#9006	9006V sa se	Magellania venosa	ventral	Z2-2	5.80083
	#9006	9006V sa se	Magellania venosa	ventral	Z2-2	3.90166
	#9006	9006V sa se	Magellania venosa	ventral	Z2-2	2.93625
	#9006	9006V sa se	Magellania venosa	ventral	Z2-2	5.65386
	#9006	9006V sa se	Magellania venosa	ventral	Z2-2	4.45934
	#9006	9006V sa se	Magellania venosa	ventral	Z2-2	4.00617
	#9006	9006V sa se	Magellania venosa	ventral	Z2-2	3.80769
	#9006	9006V sa se	Magellania venosa	ventral	Z2-2	4.24723
	#9006	9006V sa se	Magellania venosa	ventral	Z2-2	4.52746
	#9006	9006V sa se	Magellania venosa	ventral	Z2-2	3.59687
	#9006	9006V sa se	Magellania venosa	ventral	Z2-2	5.6031
	#9006	9006V sa se	Magellania venosa	ventral	Z2-2	4.06307
	#9006	9006V sa se	Magellania venosa	ventral	Z2-2	6.4678
	#9006	9006V sa se	Magellania venosa	ventral	Z2-2	4.56785
	#9006	9006V sa se	Magellania venosa	ventral	Z2-2	4.14265
	#9006	9006V sa se	Magellania venosa	ventral	Z2-2	5.80347
	#9006	9006V sa se	Magellania venosa	ventral	Z2-2	3.70447
	#9006	9006V sa se	Magellania venosa	ventral	Z2-2	4.24723
	#9006	9006V sa se	Magellania venosa	ventral	Z2-2	4.64756
	#9006	9006V sa se	Magellania venosa	ventral	Z2-2	2.87125
	#9006	9006V sa se	Magellania venosa	ventral	Z2-2	3.6209
	#9006	9006V sa se	Magellania venosa	ventral	Z2-2	4.45476
	#9006	9006V sa se	Magellania venosa	ventral	Z2-2	4.22072
	#9006	9006V sa se	Magellania venosa	ventral	Z2-2	4.84954
	#9006	9006V sa se	Magellania venosa	ventral	Z2-2	3.13782
	#9006	9006V sa se	Magellania venosa	ventral	Z2-2	3.2465
	#9006	9006V sa se	Magellania venosa	ventral	Z2-2	3.35773
	#9006	9006V sa se	Magellania venosa	ventral	Z2-2	2.95703
	#9006	9006V sa se	Magellania venosa	ventral	Z2-2	4.00235
	#9006	9006V sa se	Magellania venosa	ventral	Z2-2	3.45803
	#9006	9006V sa se	Magellania venosa	ventral	Z2-2	3.92902
	#9006	9006V sa se	Magellania venosa	ventral	Z2-2	4.02522
	#9006	9006V sa se	Magellania venosa	ventral	Z2-2	5.66468
	#9006	9006V sa se	Magellania venosa	ventral	Z2-2	6.996
	#9006	9006V sa se	Magellania venosa	ventral	Z2-2	3.98446
	#9006	9006V sa se	Magellania venosa	ventral	Z2-2	5.29316
	#9006	9006V sa se	Magellania venosa	ventral	Z2-2	3.65874
	#9006	9006V sa se	Magellania venosa	ventral	Z2-2	4.60012
	#9006	9006V sa se	Magellania venosa	ventral	Z2-2	3.64897
	#9006	9006V sa se	Magellania venosa	ventral	Z2-2	4.52746
	#9006	9006V sa se	Magellania venosa	ventral	Z2-2	4.76035
	#9006	9006V sa se	Magellania venosa	ventral	Z2-2	4.85794
	#9006	9006V sa se	Magellania venosa	ventral	Z2-2	4.35399
	#9006	9006V sa se	Magellania venosa	ventral	Z2-2	5.13167
	#9006	9006V sa se	Magellania venosa	ventral	Z2-2	4.38551
	#9006	9006V sa se	Magellania venosa	ventral	Z2-2	4.12661
	#9006	9006V sa se	Magellania venosa	ventral	Z2-2	5.57846
	#158	158 a e	Magellania venosa	ventral	Z1-1		9
	#158	158 a e	Magellania venosa	ventral	Z1-1		8
	#158	158 a e	Magellania venosa	ventral	Z1-1		8
	#158	158 a e	Magellania venosa	ventral	Z1-1		7
	#158	158 a se	Magellania venosa	ventral	Z1-2		7
	#158	158 a se	Magellania venosa	ventral	Z1-2		8
	#158	158 a se	Magellania venosa	ventral	Z1-2		6
	#158	158 a se	Magellania venosa	ventral	Z1-2		6
	#158	158 sa e	Magellania venosa	ventral	Z2-1		5
	#158	158 sa e	Magellania venosa	ventral	Z2-1		6
	#158	158 sa e	Magellania venosa	ventral	Z2-1		7
	#158	158 sa e	Magellania venosa	ventral	Z2-1		7
	#158	158 sa e	Magellania venosa	ventral	Z2-1		6
	#158	158 sa se	Magellania venosa	ventral	Z2-2		5
	#158	158 sa se	Magellania venosa	ventral	Z2-2		7
	#158	158 sa se	Magellania venosa	ventral	Z2-2		5
	#158	158 sa se	Magellania venosa	ventral	Z2-2		6
	#158	158 sa se	Magellania venosa	ventral	Z2-2		6
	#223	223 a e	Magellania venosa	ventral	Z1-1		9
	#223	223 a e	Magellania venosa	ventral	Z1-1		8
	#223	223 a e	Magellania venosa	ventral	Z1-1		9
	#223	223 a se	Magellania venosa	ventral	Z1-2		7
	#223	223 a se	Magellania venosa	ventral	Z1-2		6
	#223	223 a se	Magellania venosa	ventral	Z1-2		8
	#223	223 sa e	Magellania venosa	ventral	Z2-1		6
	#223	223 sa e	Magellania venosa	ventral	Z2-1		6
	#223	223 sa e	Magellania venosa	ventral	Z2-1		7
	#223	223 sa e	Magellania venosa	ventral	Z2-1		6
	#223	223 sa e	Magellania venosa	ventral	Z2-1		6
	#223	223 sa e	Magellania venosa	ventral	Z2-1		7
	#223	223 sa e	Magellania venosa	ventral	Z2-1		7
	#223	223 sa e	Magellania venosa	ventral	Z2-1		7
	#223	223 sa e	Magellania venosa	ventral	Z2-1		8
	#223	223 sa se	Magellania venosa	ventral	Z2-2		5
	#223	223 sa se	Magellania venosa	ventral	Z2-2		6
	#223	223 sa se	Magellania venosa	ventral	Z2-2		6
	#223	223 sa se	Magellania venosa	ventral	Z2-2		5
	#223	223 sa se	Magellania venosa	ventral	Z2-2		5
	#223	223 sa se	Magellania venosa	ventral	Z2-2		7
	#223	223 sa se	Magellania venosa	ventral	Z2-2		6
	#223	223 sa se	Magellania venosa	ventral	Z2-2		7
	#223	223 sa se	Magellania venosa	ventral	Z2-2		7
	#43	43 a e	Magellania venosa	ventral	Z1-1		8
	#43	43 a e	Magellania venosa	ventral	Z1-1		6
	#43	43 a e	Magellania venosa	ventral	Z1-1		8
	#43	43 a e	Magellania venosa	ventral	Z1-1		7
	#43	43 a e	Magellania venosa	ventral	Z1-1		7
	#43	43 a e	Magellania venosa	ventral	Z1-1		6
	#43	43 a e	Magellania venosa	ventral	Z1-1		5
	#43	43 a e	Magellania venosa	ventral	Z1-1		7
	#43	43 a e	Magellania venosa	ventral	Z1-1		5
	#43	43 a e	Magellania venosa	ventral	Z1-1		5
	#43	43 a e	Magellania venosa	ventral	Z1-1		8
	#43	43 a e	Magellania venosa	ventral	Z1-1		7
	#43	43 a e	Magellania venosa	ventral	Z1-1		7
	#43	43 a e	Magellania venosa	ventral	Z1-1		7
	#43	43 a e	Magellania venosa	ventral	Z1-1		5
	#43	43 a e	Magellania venosa	ventral	Z1-1		6
	#43	43 a e	Magellania venosa	ventral	Z1-1		8
	#43	43 a e	Magellania venosa	ventral	Z1-1		7
	#43	43 a se	Magellania venosa	ventral	Z1-2		8
	#43	43 a se	Magellania venosa	ventral	Z1-2		8
	#43	43 a se	Magellania venosa	ventral	Z1-2		6
	#43	43 a se	Magellania venosa	ventral	Z1-2		6
	#43	43 a se	Magellania venosa	ventral	Z1-2		4
	#43	43 a se	Magellania venosa	ventral	Z1-2		6
	#43	43 a se	Magellania venosa	ventral	Z1-2		6
	#43	43 a se	Magellania venosa	ventral	Z1-2		6
	#43	43 a se	Magellania venosa	ventral	Z1-2		5
	#43	43 a se	Magellania venosa	ventral	Z1-2		6
	#43	43 a se	Magellania venosa	ventral	Z1-2		6
	#43	43 a se	Magellania venosa	ventral	Z1-2		7
	#43	43 a se	Magellania venosa	ventral	Z1-2		7
	#43	43 a se	Magellania venosa	ventral	Z1-2		7
	#43	43 a se	Magellania venosa	ventral	Z1-2		5
	#43	43 a se	Magellania venosa	ventral	Z1-2		5
	#43	43 a se	Magellania venosa	ventral	Z1-2		7
	#43	43 a se	Magellania venosa	ventral	Z1-2		7
	#43	43 sa e	Magellania venosa	ventral	Z2-1		8
	#43	43 sa e	Magellania venosa	ventral	Z2-1		7
	#43	43 sa e	Magellania venosa	ventral	Z2-1		5
	#43	43 sa e	Magellania venosa	ventral	Z2-1		6
	#43	43 sa e	Magellania venosa	ventral	Z2-1		6
	#43	43 sa e	Magellania venosa	ventral	Z2-1		7
	#43	43 sa e	Magellania venosa	ventral	Z2-1		6
	#43	43 sa e	Magellania venosa	ventral	Z2-1		7
	#43	43 sa e	Magellania venosa	ventral	Z2-1		6
	#43	43 sa e	Magellania venosa	ventral	Z2-1		6
	#43	43 sa e	Magellania venosa	ventral	Z2-1		6
	#43	43 sa e	Magellania venosa	ventral	Z2-1		6
	#43	43 sa e	Magellania venosa	ventral	Z2-1		7
	#43	43 sa e	Magellania venosa	ventral	Z2-1		8
	#43	43 sa e	Magellania venosa	ventral	Z2-1		6
	#43	43 sa e	Magellania venosa	ventral	Z2-1		5
	#43	43 sa se	Magellania venosa	ventral	Z2-2		8
	#43	43 sa se	Magellania venosa	ventral	Z2-2		6
	#43	43 sa se	Magellania venosa	ventral	Z2-2		4
	#43	43 sa se	Magellania venosa	ventral	Z2-2		6
	#43	43 sa se	Magellania venosa	ventral	Z2-2		6
	#43	43 sa se	Magellania venosa	ventral	Z2-2		5
	#43	43 sa se	Magellania venosa	ventral	Z2-2		6
	#43	43 sa se	Magellania venosa	ventral	Z2-2		6
	#43	43 sa se	Magellania venosa	ventral	Z2-2		5
	#43	43 sa se	Magellania venosa	ventral	Z2-2		5
	#43	43 sa se	Magellania venosa	ventral	Z2-2		5
	#43	43 sa se	Magellania venosa	ventral	Z2-2		5
	#43	43 sa se	Magellania venosa	ventral	Z2-2		5
	#43	43 sa se	Magellania venosa	ventral	Z2-2		6
	#43	43 sa se	Magellania venosa	ventral	Z2-2		6
	#43	43 sa se	Magellania venosa	ventral	Z2-2		7
	#63	63 a e	Magellania venosa	ventral	Z1-1		7
	#63	63 a e	Magellania venosa	ventral	Z1-1		8
	#63	63 a e	Magellania venosa	ventral	Z1-1		7
	#63	63 a e	Magellania venosa	ventral	Z1-1		6
	#63	63 a e	Magellania venosa	ventral	Z1-1		7
	#63	63 a e	Magellania venosa	ventral	Z1-1		7
	#63	63 a e	Magellania venosa	ventral	Z1-1		8
	#63	63 a e	Magellania venosa	ventral	Z1-1		8
	#63	63 a e	Magellania venosa	ventral	Z1-1		7
	#63	63 a se	Magellania venosa	ventral	Z1-2		6
	#63	63 a se	Magellania venosa	ventral	Z1-2		8
	#63	63 a se	Magellania venosa	ventral	Z1-2		8
	#63	63 a se	Magellania venosa	ventral	Z1-2		5
	#63	63 a se	Magellania venosa	ventral	Z1-2		8
	#63	63 a se	Magellania venosa	ventral	Z1-2		8
	#63	63 a se	Magellania venosa	ventral	Z1-2		7
	#63	63 a se	Magellania venosa	ventral	Z1-2		8
	#63	63 a se	Magellania venosa	ventral	Z1-2		6
	#63	63 sa e	Magellania venosa	ventral	Z2-1		6
	#63	63 sa e	Magellania venosa	ventral	Z2-1		8
	#63	63 sa e	Magellania venosa	ventral	Z2-1		5
	#63	63 sa e	Magellania venosa	ventral	Z2-1		6
	#63	63 sa e	Magellania venosa	ventral	Z2-1		6
	#63	63 sa e	Magellania venosa	ventral	Z2-1		7
	#63	63 sa se	Magellania venosa	ventral	Z2-2		6
	#63	63 sa se	Magellania venosa	ventral	Z2-2		7
	#63	63 sa se	Magellania venosa	ventral	Z2-2		4
	#63	63 sa se	Magellania venosa	ventral	Z2-2		5
	#63	63 sa se	Magellania venosa	ventral	Z2-2		5
	#63	63 sa se	Magellania venosa	ventral	Z2-2		6
	#8005	8005D a e	Magellania venosa	dorsal	Z4-1		5
	#8005	8005D a e	Magellania venosa	dorsal	Z4-1		6
	#8005	8005D a e	Magellania venosa	dorsal	Z4-1		6
	#8005	8005D a e	Magellania venosa	dorsal	Z4-1		5
	#8005	8005D a e	Magellania venosa	dorsal	Z4-1		5
	#8005	8005D a e	Magellania venosa	dorsal	Z4-1		5
	#8005	8005D a e	Magellania venosa	dorsal	Z4-1		5
	#8005	8005D a e	Magellania venosa	dorsal	Z4-1		5
	#8005	8005D a e	Magellania venosa	dorsal	Z4-1		4
	#8005	8005D a e	Magellania venosa	dorsal	Z4-1		5
	#8005	8005D a e	Magellania venosa	dorsal	Z4-1		6
	#8005	8005D a e	Magellania venosa	dorsal	Z4-1		7
	#8005	8005D a e	Magellania venosa	dorsal	Z4-1		6
	#8005	8005D a se	Magellania venosa	dorsal	Z4-2		5
	#8005	8005D a se	Magellania venosa	dorsal	Z4-2		6
	#8005	8005D a se	Magellania venosa	dorsal	Z4-2		5
	#8005	8005D a se	Magellania venosa	dorsal	Z4-2		4
	#8005	8005D a se	Magellania venosa	dorsal	Z4-2		5
	#8005	8005D a se	Magellania venosa	dorsal	Z4-2		5
	#8005	8005D a se	Magellania venosa	dorsal	Z4-2		5
	#8005	8005D a se	Magellania venosa	dorsal	Z4-2		4
	#8005	8005D a se	Magellania venosa	dorsal	Z4-2		4
	#8005	8005D a se	Magellania venosa	dorsal	Z4-2		5
	#8005	8005D a se	Magellania venosa	dorsal	Z4-2		4
	#8005	8005D a se	Magellania venosa	dorsal	Z4-2		4
	#8005	8005D a se	Magellania venosa	dorsal	Z4-2		4
	#8005	8005V a e	Magellania venosa	ventral	Z1-1		5
	#8005	8005V a e	Magellania venosa	ventral	Z1-1		4
	#8005	8005V a e	Magellania venosa	ventral	Z1-1		6
	#8005	8005V a e	Magellania venosa	ventral	Z1-1		5
	#8005	8005V a e	Magellania venosa	ventral	Z1-1		7
	#8005	8005V a e	Magellania venosa	ventral	Z1-1		6
	#8005	8005V a e	Magellania venosa	ventral	Z1-1		6
	#8005	8005V a e	Magellania venosa	ventral	Z1-1		8
	#8005	8005V a e	Magellania venosa	ventral	Z1-1		6
	#8005	8005V a e	Magellania venosa	ventral	Z1-1		6
	#8005	8005V a e	Magellania venosa	ventral	Z1-1		6
	#8005	8005V a e	Magellania venosa	ventral	Z1-1		6
	#8005	8005V a e	Magellania venosa	ventral	Z1-1		5
	#8005	8005V a se	Magellania venosa	ventral	Z1-2		6
	#8005	8005V a se	Magellania venosa	ventral	Z1-2		4
	#8005	8005V a se	Magellania venosa	ventral	Z1-2		5
	#8005	8005V a se	Magellania venosa	ventral	Z1-2		5
	#8005	8005V a se	Magellania venosa	ventral	Z1-2		5
	#8005	8005V a se	Magellania venosa	ventral	Z1-2		4
	#8005	8005V a se	Magellania venosa	ventral	Z1-2		5
	#8005	8005V a se	Magellania venosa	ventral	Z1-2		6
	#8005	8005V a se	Magellania venosa	ventral	Z1-2		5
	#8005	8005V a se	Magellania venosa	ventral	Z1-2		4
	#8005	8005V a se	Magellania venosa	ventral	Z1-2		5
	#8005	8005V a se	Magellania venosa	ventral	Z1-2		4
	#8005	8005V a se	Magellania venosa	ventral	Z1-2		4
	#8005	8005V sa e	Magellania venosa	ventral	Z2-1		6
	#8005	8005V sa e	Magellania venosa	ventral	Z2-1		5
	#8005	8005V sa e	Magellania venosa	ventral	Z2-1		7
	#8005	8005V sa e	Magellania venosa	ventral	Z2-1		5
	#8005	8005V sa e	Magellania venosa	ventral	Z2-1		6
	#8005	8005V sa e	Magellania venosa	ventral	Z2-1		6
	#8005	8005V sa e	Magellania venosa	ventral	Z2-1		7
	#8005	8005V sa e	Magellania venosa	ventral	Z2-1		5
	#8005	8005V sa e	Magellania venosa	ventral	Z2-1		6
	#8005	8005V sa e	Magellania venosa	ventral	Z2-1		5
	#8005	8005V sa e	Magellania venosa	ventral	Z2-1		5
	#8005	8005V sa e	Magellania venosa	ventral	Z2-1		6
	#8005	8005V sa e	Magellania venosa	ventral	Z2-1		5
	#8005	8005V sa e	Magellania venosa	ventral	Z2-1		6
	#8005	8005V sa e	Magellania venosa	ventral	Z2-1		5
	#8005	8005V sa e	Magellania venosa	ventral	Z2-1		7
	#8005	8005V sa e	Magellania venosa	ventral	Z2-1		5
	#8005	8005V sa se	Magellania venosa	ventral	Z2-2		5
	#8005	8005V sa se	Magellania venosa	ventral	Z2-2		4
	#8005	8005V sa se	Magellania venosa	ventral	Z2-2		4
	#8005	8005V sa se	Magellania venosa	ventral	Z2-2		4
	#8005	8005V sa se	Magellania venosa	ventral	Z2-2		6
	#8005	8005V sa se	Magellania venosa	ventral	Z2-2		5
	#8005	8005V sa se	Magellania venosa	ventral	Z2-2		5
	#8005	8005V sa se	Magellania venosa	ventral	Z2-2		5
	#8005	8005V sa se	Magellania venosa	ventral	Z2-2		5
	#8005	8005V sa se	Magellania venosa	ventral	Z2-2		5
	#8005	8005V sa se	Magellania venosa	ventral	Z2-2		4
	#8005	8005V sa se	Magellania venosa	ventral	Z2-2		5
	#8005	8005V sa se	Magellania venosa	ventral	Z2-2		4
	#8005	8005V sa se	Magellania venosa	ventral	Z2-2		5
	#8005	8005V sa se	Magellania venosa	ventral	Z2-2		5
	#8005	8005V sa se	Magellania venosa	ventral	Z2-2		6
	#8005	8005V sa se	Magellania venosa	ventral	Z2-2		6
	#8005	8005V 2sa e	Magellania venosa	ventral	Z3-1		4
	#8005	8005V 2sa e	Magellania venosa	ventral	Z3-1		5
	#8005	8005V 2sa e	Magellania venosa	ventral	Z3-1		5
	#8005	8005V 2sa e	Magellania venosa	ventral	Z3-1		6
	#8005	8005V 2sa e	Magellania venosa	ventral	Z3-1		6
	#8005	8005V 2sa e	Magellania venosa	ventral	Z3-1		6
	#8005	8005V 2sa e	Magellania venosa	ventral	Z3-1		7
	#8005	8005V 2sa e	Magellania venosa	ventral	Z3-1		5
	#8005	8005V 2sa e	Magellania venosa	ventral	Z3-1		6
	#8005	8005V 2sa e	Magellania venosa	ventral	Z3-1		7
	#8005	8005V 2sa e	Magellania venosa	ventral	Z3-1		6
	#8005	8005V 2sa se	Magellania venosa	ventral	Z3-2		4
	#8005	8005V 2sa se	Magellania venosa	ventral	Z3-2		5
	#8005	8005V 2sa se	Magellania venosa	ventral	Z3-2		5
	#8005	8005V 2sa se	Magellania venosa	ventral	Z3-2		6
	#8005	8005V 2sa se	Magellania venosa	ventral	Z3-2		5
	#8005	8005V 2sa se	Magellania venosa	ventral	Z3-2		5
	#8005	8005V 2sa se	Magellania venosa	ventral	Z3-2		5
	#8005	8005V 2sa se	Magellania venosa	ventral	Z3-2		5
	#8005	8005V 2sa se	Magellania venosa	ventral	Z3-2		6
	#8005	8005V 2sa se	Magellania venosa	ventral	Z3-2		5
	#8005	8005V 2sa se	Magellania venosa	ventral	Z3-2		5
	#9006	9006D a e	Magellania venosa	dorsal	Z4-1		6
	#9006	9006D a e	Magellania venosa	dorsal	Z4-1		8
	#9006	9006D a e	Magellania venosa	dorsal	Z4-1		5
	#9006	9006D a e	Magellania venosa	dorsal	Z4-1		5
	#9006	9006D a e	Magellania venosa	dorsal	Z4-1		6
	#9006	9006D a e	Magellania venosa	dorsal	Z4-1		7
	#9006	9006D a e	Magellania venosa	dorsal	Z4-1		6
	#9006	9006D a e	Magellania venosa	dorsal	Z4-1		6
	#9006	9006D a se	Magellania venosa	dorsal	Z4-2		5
	#9006	9006D a se	Magellania venosa	dorsal	Z4-2		7
	#9006	9006D a se	Magellania venosa	dorsal	Z4-2		6
	#9006	9006D a se	Magellania venosa	dorsal	Z4-2		6
	#9006	9006D a se	Magellania venosa	dorsal	Z4-2		4
	#9006	9006D a se	Magellania venosa	dorsal	Z4-2		7
	#9006	9006D a se	Magellania venosa	dorsal	Z4-2		6
	#9006	9006D a se	Magellania venosa	dorsal	Z4-2		5
	#9006	9006D sa e	Magellania venosa	dorsal	Z5-1		7
	#9006	9006D sa e	Magellania venosa	dorsal	Z5-1		6
	#9006	9006D sa e	Magellania venosa	dorsal	Z5-1		7
	#9006	9006D sa e	Magellania venosa	dorsal	Z5-1		8
	#9006	9006D sa e	Magellania venosa	dorsal	Z5-1		7
	#9006	9006D sa e	Magellania venosa	dorsal	Z5-1		7
	#9006	9006D sa e	Magellania venosa	dorsal	Z5-1		5
	#9006	9006D sa e	Magellania venosa	dorsal	Z5-1		6
	#9006	9006D sa e	Magellania venosa	dorsal	Z5-1		6
	#9006	9006D sa e	Magellania venosa	dorsal	Z5-1		6
	#9006	9006D sa se	Magellania venosa	dorsal	Z5-2		6
	#9006	9006D sa se	Magellania venosa	dorsal	Z5-2		5
	#9006	9006D sa se	Magellania venosa	dorsal	Z5-2		7
	#9006	9006D sa se	Magellania venosa	dorsal	Z5-2		6
	#9006	9006D sa se	Magellania venosa	dorsal	Z5-2		7
	#9006	9006D sa se	Magellania venosa	dorsal	Z5-2		6
	#9006	9006D sa se	Magellania venosa	dorsal	Z5-2		5
	#9006	9006D sa se	Magellania venosa	dorsal	Z5-2		5
	#9006	9006D sa se	Magellania venosa	dorsal	Z5-2		6
	#9006	9006D sa se	Magellania venosa	dorsal	Z5-2		7
	#9006	9006D 2sa e	Magellania venosa	dorsal	Z6-1		6
	#9006	9006D 2sa e	Magellania venosa	dorsal	Z6-1		7
	#9006	9006D 2sa e	Magellania venosa	dorsal	Z6-1		6
	#9006	9006D 2sa e	Magellania venosa	dorsal	Z6-1		7
	#9006	9006D 2sa e	Magellania venosa	dorsal	Z6-1		7
	#9006	9006D 2sa e	Magellania venosa	dorsal	Z6-1		6
	#9006	9006D 2sa e	Magellania venosa	dorsal	Z6-1		5
	#9006	9006D 2sa e	Magellania venosa	dorsal	Z6-1		6
	#9006	9006D 2sa e	Magellania venosa	dorsal	Z6-1		7
	#9006	9006D 2sa e	Magellania venosa	dorsal	Z6-1		8
	#9006	9006D 2sa e	Magellania venosa	dorsal	Z6-1		7
	#9006	9006D 2sa e	Magellania venosa	dorsal	Z6-1		7
	#9006	9006D 2sa e	Magellania venosa	dorsal	Z6-1		7
	#9006	9006D 2sa e	Magellania venosa	dorsal	Z6-1		6
	#9006	9006D 2sa se	Magellania venosa	dorsal	Z6-2		6
	#9006	9006D 2sa se	Magellania venosa	dorsal	Z6-2		6
	#9006	9006D 2sa se	Magellania venosa	dorsal	Z6-2		5
	#9006	9006D 2sa se	Magellania venosa	dorsal	Z6-2		5
	#9006	9006D 2sa se	Magellania venosa	dorsal	Z6-2		6
	#9006	9006D 2sa se	Magellania venosa	dorsal	Z6-2		7
	#9006	9006D 2sa se	Magellania venosa	dorsal	Z6-2		5
	#9006	9006D 2sa se	Magellania venosa	dorsal	Z6-2		5
	#9006	9006D 2sa se	Magellania venosa	dorsal	Z6-2		5
	#9006	9006D 2sa se	Magellania venosa	dorsal	Z6-2		7
	#9006	9006D 2sa se	Magellania venosa	dorsal	Z6-2		6
	#9006	9006D 2sa se	Magellania venosa	dorsal	Z6-2		5
	#9006	9006D 2sa se	Magellania venosa	dorsal	Z6-2		7
	#9006	9006D 2sa se	Magellania venosa	dorsal	Z6-2		5
	#9006	9006V a e	Magellania venosa	ventral	Z1-1		7
	#9006	9006V a e	Magellania venosa	ventral	Z1-1		5
	#9006	9006V a e	Magellania venosa	ventral	Z1-1		6
	#9006	9006V a e	Magellania venosa	ventral	Z1-1		7
	#9006	9006V a e	Magellania venosa	ventral	Z1-1		7
	#9006	9006V a e	Magellania venosa	ventral	Z1-1		5
	#9006	9006V a e	Magellania venosa	ventral	Z1-1		7
	#9006	9006V a e	Magellania venosa	ventral	Z1-1		7
	#9006	9006V a se	Magellania venosa	ventral	Z1-2		7
	#9006	9006V a se	Magellania venosa	ventral	Z1-2		4
	#9006	9006V a se	Magellania venosa	ventral	Z1-2		6
	#9006	9006V a se	Magellania venosa	ventral	Z1-2		5
	#9006	9006V a se	Magellania venosa	ventral	Z1-2		6
	#9006	9006V a se	Magellania venosa	ventral	Z1-2		6
	#9006	9006V a se	Magellania venosa	ventral	Z1-2		6
	#9006	9006V a se	Magellania venosa	ventral	Z1-2		6
	#9006	9006V sa e	Magellania venosa	ventral	Z2-1		7
	#9006	9006V sa e	Magellania venosa	ventral	Z2-1		8
	#9006	9006V sa e	Magellania venosa	ventral	Z2-1		7
	#9006	9006V sa e	Magellania venosa	ventral	Z2-1		6
	#9006	9006V sa e	Magellania venosa	ventral	Z2-1		6
	#9006	9006V sa e	Magellania venosa	ventral	Z2-1		6
	#9006	9006V sa e	Magellania venosa	ventral	Z2-1		7
	#9006	9006V sa e	Magellania venosa	ventral	Z2-1		7
	#9006	9006V sa e	Magellania venosa	ventral	Z2-1		8
	#9006	9006V sa e	Magellania venosa	ventral	Z2-1		6
	#9006	9006V sa e	Magellania venosa	ventral	Z2-1		7
	#9006	9006V sa e	Magellania venosa	ventral	Z2-1		8
	#9006	9006V sa e	Magellania venosa	ventral	Z2-1		8
	#9006	9006V sa e	Magellania venosa	ventral	Z2-1		7
	#9006	9006V sa e	Magellania venosa	ventral	Z2-1		7
	#9006	9006V sa e	Magellania venosa	ventral	Z2-1		6
	#9006	9006V sa e	Magellania venosa	ventral	Z2-1		7
	#9006	9006V sa e	Magellania venosa	ventral	Z2-1		6
	#9006	9006V sa se	Magellania venosa	ventral	Z2-2		5
	#9006	9006V sa se	Magellania venosa	ventral	Z2-2		6
	#9006	9006V sa se	Magellania venosa	ventral	Z2-2		5
	#9006	9006V sa se	Magellania venosa	ventral	Z2-2		5
	#9006	9006V sa se	Magellania venosa	ventral	Z2-2		5
	#9006	9006V sa se	Magellania venosa	ventral	Z2-2		6
	#9006	9006V sa se	Magellania venosa	ventral	Z2-2		6
	#9006	9006V sa se	Magellania venosa	ventral	Z2-2		7
	#9006	9006V sa se	Magellania venosa	ventral	Z2-2		7
	#9006	9006V sa se	Magellania venosa	ventral	Z2-2		5
	#9006	9006V sa se	Magellania venosa	ventral	Z2-2		6
	#9006	9006V sa se	Magellania venosa	ventral	Z2-2		6
	#9006	9006V sa se	Magellania venosa	ventral	Z2-2		7
	#9006	9006V sa se	Magellania venosa	ventral	Z2-2		6
	#9006	9006V sa se	Magellania venosa	ventral	Z2-2		6
	#9006	9006V sa se	Magellania venosa	ventral	Z2-2		6
	#9006	9006V sa se	Magellania venosa	ventral	Z2-2		6
	#9006	9006V sa se	Magellania venosa	ventral	Z2-2		5
	#9006	9006V 2sa e	Magellania venosa	ventral	Z3-1		6
	#9006	9006V 2sa e	Magellania venosa	ventral	Z3-1		8
	#9006	9006V 2sa e	Magellania venosa	ventral	Z3-1		8
	#9006	9006V 2sa e	Magellania venosa	ventral	Z3-1		6
	#9006	9006V 2sa e	Magellania venosa	ventral	Z3-1		6
	#9006	9006V 2sa e	Magellania venosa	ventral	Z3-1		7
	#9006	9006V 2sa e	Magellania venosa	ventral	Z3-1		7
	#9006	9006V 2sa e	Magellania venosa	ventral	Z3-1		5
	#9006	9006V 2sa e	Magellania venosa	ventral	Z3-1		7
	#9006	9006V 2sa e	Magellania venosa	ventral	Z3-1		7
	#9006	9006V 2sa e	Magellania venosa	ventral	Z3-1		6
	#9006	9006V 2sa e	Magellania venosa	ventral	Z3-1		6
	#9006	9006V 2sa se	Magellania venosa	ventral	Z3-2		6
	#9006	9006V 2sa se	Magellania venosa	ventral	Z3-2		7
	#9006	9006V 2sa se	Magellania venosa	ventral	Z3-2		6
	#9006	9006V 2sa se	Magellania venosa	ventral	Z3-2		7
	#9006	9006V 2sa se	Magellania venosa	ventral	Z3-2		6
	#9006	9006V 2sa se	Magellania venosa	ventral	Z3-2		7
	#9006	9006V 2sa se	Magellania venosa	ventral	Z3-2		7
	#9006	9006V 2sa se	Magellania venosa	ventral	Z3-2		5
	#9006	9006V 2sa se	Magellania venosa	ventral	Z3-2		7
	#9006	9006V 2sa se	Magellania venosa	ventral	Z3-2		6
	#9006	9006V 2sa se	Magellania venosa	ventral	Z3-2		6
	#9006	9006V 2sa se	Magellania venosa	ventral	Z3-2		6
	Position information reference from Figure 9

## Sheet: measurement on PL and Pt
No.	No. of specimen	No. of SEM	Species	Valve	Position	Thickness of primary layer (μm)	No. of endopunctae (800*800 μm)	Diameter (max) of endopunctae (μm)
	#8005	285DA	Magellania venosa	dorsal	A1	19.7993
	#8005	285DA	Magellania venosa	dorsal	A1	25.4303
	#8005	285DA	Magellania venosa	dorsal	A1	20.5227
	#8005	285DA	Magellania venosa	dorsal	A1	25.4713
	#8005	285DA	Magellania venosa	dorsal	A1	27.0569
	#8005	285DA	Magellania venosa	dorsal	A1	26.5856
	#8005	285DA	Magellania venosa	dorsal	A1	24.9517
	#8005	285DA	Magellania venosa	dorsal	A1	25.0229
	#8005	285DA	Magellania venosa	dorsal	A2	27.9446
	#8005	285DA	Magellania venosa	dorsal	A2	25.4713
	#8005	285DA	Magellania venosa	dorsal	A2	24.7557
	#8005	285DA	Magellania venosa	dorsal	A2	23.1015
	#8005	285DA	Magellania venosa	dorsal	A3	21.7666
	#8005	285DA	Magellania venosa	dorsal	A3	23.3333
	#8005	285DA	Magellania venosa	dorsal	A3	27.5
	#8005	285DA	Magellania venosa	dorsal	A3	21.6707
	#8005	285DA	Magellania venosa	dorsal	C1	12.1478
	#8005	285DA	Magellania venosa	dorsal	C1	10.9608
	#8005	285DA	Magellania venosa	dorsal	C1	9.10014
	#8005	285DA	Magellania venosa	dorsal	C1	10.9608
	#8005	285DA	Magellania venosa	dorsal	C1	15.052
	#8005	285DA	Magellania venosa	dorsal	C1	14.7314
	#8005	285DA	Magellania venosa	dorsal	C1	8.49836
	#8005	285DA	Magellania venosa	dorsal	C1	9.72718
	#8005	285DA	Magellania venosa	dorsal	C2	33.8142
	#8005	285DA	Magellania venosa	dorsal	C2	36.6525
	#8005	285DA	Magellania venosa	dorsal	C2	22.2244
	#8005	285DA	Magellania venosa	dorsal	C2	22.1461
	#8005	285DA	Magellania venosa	dorsal	C2	25.3448
	#8005	285DA	Magellania venosa	dorsal	C2	27.7013
	#8005	285DA	Magellania venosa	dorsal	C2	34.2287
	#8005	285DA	Magellania venosa	dorsal	C2	26.6898
	#8005	285DA	Magellania venosa	dorsal	C2	31.6667
	#8005	285DA	Magellania venosa	dorsal	C2	29.4497
	#8005	285DA	Magellania venosa	dorsal	P	13.0237
	#8005	285DA	Magellania venosa	dorsal	P	10.5492
	#8005	285DA	Magellania venosa	dorsal	P	12.6724
	#8005	285DA	Magellania venosa	dorsal	P	11.0318
	#8005	285VA	Magellania venosa	ventral	A1	45.0944
	#8005	285VA	Magellania venosa	ventral	A1	42.5184
	#8005	285VA	Magellania venosa	ventral	A1	47.9818
	#8005	285VA	Magellania venosa	ventral	A1	38.3333
	#8005	285VA	Magellania venosa	ventral	A1	44.2758
	#8005	285VA	Magellania venosa	ventral	A1	43.8806
	#8005	285VA	Magellania venosa	ventral	A1	46.2603
	#8005	285VA	Magellania venosa	ventral	A1	45.087
	#8005	285VA	Magellania venosa	ventral	A2	45
	#8005	285VA	Magellania venosa	ventral	A2	44.0454
	#8005	285VA	Magellania venosa	ventral	A2	45.0444
	#8005	285VA	Magellania venosa	ventral	A2	36.0555
	#8005	285VA	Magellania venosa	ventral	A2	37.3363
	#8005	285VA	Magellania venosa	ventral	A2	45.0444
	#8005	285VA	Magellania venosa	ventral	A3	37.5208
	#8005	285VA	Magellania venosa	ventral	A3	37.5208
	#8005	285VA	Magellania venosa	ventral	A3	29.6303
	#8005	285VA	Magellania venosa	ventral	A3	31.6694
	#8005	285VA	Magellania venosa	ventral	C1	11.8512
	#8005	285VA	Magellania venosa	ventral	C1	8.49836
	#8005	285VA	Magellania venosa	ventral	C1	10.9052
	#8005	285VA	Magellania venosa	ventral	C1	13.5657
	#8005	285VA	Magellania venosa	ventral	C1	20.5227
	#8005	285VA	Magellania venosa	ventral	C1	16.7135
	#8005	285VA	Magellania venosa	ventral	C2	50.0156
	#8005	285VA	Magellania venosa	ventral	C2	46.4373
	#8005	285VA	Magellania venosa	ventral	C2	42.5449
	#8005	285VA	Magellania venosa	ventral	C2	45.5388
	#8005	285VA	Magellania venosa	ventral	C2	49.8354
	#8005	285VA	Magellania venosa	ventral	C2	47.8157
	#8005	285VA	Magellania venosa	ventral	C2	50.2732
	#8005	285VA	Magellania venosa	ventral	C2	48.1202
	#8005	285VA	Magellania venosa	ventral	P	15.2809
	#8005	285VA	Magellania venosa	ventral	P	20
	#9006	396DA	Magellania venosa	dorsal	A1	23.3333
	#9006	396DA	Magellania venosa	dorsal	A1	21.4492
	#9006	396DA	Magellania venosa	dorsal	A1	26.6471
	#9006	396DA	Magellania venosa	dorsal	A1	23.3928
	#9006	396DA	Magellania venosa	dorsal	A1	19.044
	#9006	396DA	Magellania venosa	dorsal	A1	31.0605
	#9006	396DA	Magellania venosa	dorsal	A1	39.9266
	#9006	396DA	Magellania venosa	dorsal	A1	34.7907
	#9006	396DA	Magellania venosa	dorsal	A1	35.6309
	#9006	396DA	Magellania venosa	dorsal	A1	32.9931
	#9006	396DA	Magellania venosa	dorsal	A2	36.688
	#9006	396DA	Magellania venosa	dorsal	A2	24.6398
	#9006	396DA	Magellania venosa	dorsal	A2	22.5039
	#9006	396DA	Magellania venosa	dorsal	A2	25.5019
	#9006	396DA	Magellania venosa	dorsal	A2	27.1633
	#9006	396DA	Magellania venosa	dorsal	A2	29.1667
	#9006	396DA	Magellania venosa	dorsal	A2	30
	#9006	396DA	Magellania venosa	dorsal	A2	28.7983
	#9006	396DA	Magellania venosa	dorsal	A3	32.342
	#9006	396DA	Magellania venosa	dorsal	A3	29.0981
	#9006	396DA	Magellania venosa	dorsal	A3	31.25
	#9006	396DA	Magellania venosa	dorsal	A3	38.6513
	#9006	396DA	Magellania venosa	dorsal	C1	17.5446
	#9006	396DA	Magellania venosa	dorsal	C1	17.7414
	#9006	396DA	Magellania venosa	dorsal	C1	16.7135
	#9006	396DA	Magellania venosa	dorsal	C1	19.2796
	#9006	396DA	Magellania venosa	dorsal	C1	16.298
	#9006	396DA	Magellania venosa	dorsal	C1	22.1187
	#9006	396DA	Magellania venosa	dorsal	C1	22.5039
	#9006	396DA	Magellania venosa	dorsal	C1	18.8239
	#9006	396DA	Magellania venosa	dorsal	C1	19.6232
	#9006	396DA	Magellania venosa	dorsal	C1	17.1644
	#9006	396DA	Magellania venosa	dorsal	C2	55.8582
	#9006	396DA	Magellania venosa	dorsal	C2	48.4213
	#9006	396DA	Magellania venosa	dorsal	C2	45.6169
	#9006	396DA	Magellania venosa	dorsal	C2	50.1404
	#9006	396DA	Magellania venosa	dorsal	C2	35.9204
	#9006	396DA	Magellania venosa	dorsal	C2	45.0309
	#9006	396DA	Magellania venosa	dorsal	C2	47.7443
	#9006	396DA	Magellania venosa	dorsal	C2	45.1306
	#9006	396DA	Magellania venosa	dorsal	C2	49.4149
	#9006	396DA	Magellania venosa	dorsal	C2	40.43
	#9006	396DA	Magellania venosa	dorsal	C2	52.3232
	#9006	396DA	Magellania venosa	dorsal	P	9.66451
	#9006	396DA	Magellania venosa	dorsal	P	9.2515
	#9006	396DA	Magellania venosa	dorsal	P	6.19419
	#9006	396DA	Magellania venosa	dorsal	P	10.0778
	#9006	396DA	Magellania venosa	dorsal	P	5.55903
	#9006	396DA	Magellania venosa	dorsal	P	14.6368
	#9006	396DA	Magellania venosa	dorsal	P	8.1862
	#9006	396VA	Magellania venosa	ventral	A1	42.5449
	#9006	396VA	Magellania venosa	ventral	A1	39.6031
	#9006	396VA	Magellania venosa	ventral	A1	37.3167
	#9006	396VA	Magellania venosa	ventral	A1	40.1754
	#9006	396VA	Magellania venosa	ventral	A1	36.7518
	#9006	396VA	Magellania venosa	ventral	A1	38.3537
	#9006	396VA	Magellania venosa	ventral	A1	36.9027
	#9006	396VA	Magellania venosa	ventral	A1	36.2329
	#9006	396VA	Magellania venosa	ventral	A1	35.5568
	#9006	396VA	Magellania venosa	ventral	A1	36.0819
	#9006	396VA	Magellania venosa	ventral	A1	26.6192
	#9006	396VA	Magellania venosa	ventral	A2	37.9533
	#9006	396VA	Magellania venosa	ventral	A2	31.6694
	#9006	396VA	Magellania venosa	ventral	A2	30.8446
	#9006	396VA	Magellania venosa	ventral	A2	31.3194
	#9006	396VA	Magellania venosa	ventral	A3	40.4853
	#9006	396VA	Magellania venosa	ventral	A3	45.2328
	#9006	396VA	Magellania venosa	ventral	A3	40.8971
	#9006	396VA	Magellania venosa	ventral	A3	38.3628
	#9006	396VA	Magellania venosa	ventral	A3	37.779
	#9006	396VA	Magellania venosa	ventral	C1	15.052
	#9006	396VA	Magellania venosa	ventral	C1	14.2644
	#9006	396VA	Magellania venosa	ventral	C1	13.9754
	#9006	396VA	Magellania venosa	ventral	C1	18.9755
	#9006	396VA	Magellania venosa	ventral	C1	12.6106
	#9006	396VA	Magellania venosa	ventral	C1	19.2074
	#9006	396VA	Magellania venosa	ventral	C1	18.6339
	#9006	396VA	Magellania venosa	ventral	C1	21.2867
	#9006	396VA	Magellania venosa	ventral	C1	16.7498
	#9006	396VA	Magellania venosa	ventral	C2	49.5903
	#9006	396VA	Magellania venosa	ventral	C2	46.6667
	#9006	396VA	Magellania venosa	ventral	C2	45.0944
	#9006	396VA	Magellania venosa	ventral	C2	51.3988
	#9006	396VA	Magellania venosa	ventral	C2	35.0892
	#9006	396VA	Magellania venosa	ventral	C2	42.0833
	#9006	396VA	Magellania venosa	ventral	C2	46.0318
	#9006	396VA	Magellania venosa	ventral	C2	44.3256
	#9006	396VA	Magellania venosa	ventral	C2	41.5959
	#9006	396VA	Magellania venosa	ventral	C2	44.8532
	#9006	396VA	Magellania venosa	ventral	C2	51.3421
	#9006	396VA	Magellania venosa	ventral	C2	43.8699
	#9006	396VA	Magellania venosa	ventral	P	11.7851
	#9006	396VA	Magellania venosa	ventral	P	10.9608
	#9006	396VA	Magellania venosa	ventral	P	8.90732
	#9006	396VA	Magellania venosa	ventral	P	6.06676
	#9006	396VA	Magellania venosa	ventral	P	10.4914
	#9006	396VA	Magellania venosa	ventral	P	10.0778
	#9006	396VA	Magellania venosa	ventral	P	10.1379
	#8005	85DDE	Magellania venosa	dorsal	A3		189
	#8005	85DDE	Magellania venosa	dorsal	A3		171
	#8005	85DDE	Magellania venosa	dorsal	A2		164
	#8005	85DDE	Magellania venosa	dorsal	A2		148
	#8005	85DDE	Magellania venosa	dorsal	A1		179
	#8005	85DDE	Magellania venosa	dorsal	C2		160
	#8005	85DDE	Magellania venosa	dorsal	C2		144
	#8005	85DDE	Magellania venosa	dorsal	C2		149
	#8005	85VEE	Magellania venosa	ventral	A3		176
	#8005	85VEE	Magellania venosa	ventral	A3		168
	#8005	85VEE	Magellania venosa	ventral	A2		151
	#8005	85VEE	Magellania venosa	ventral	A2		158
	#8005	85VEE	Magellania venosa	ventral	A1		155
	#8005	85VEE	Magellania venosa	ventral	C2		145
	#8005	85VEE	Magellania venosa	ventral	C2		143
	#9006	96DDE	Magellania venosa	dorsal	A3		172
	#9006	96DDE	Magellania venosa	dorsal	A3		168
	#9006	96DDE	Magellania venosa	dorsal	A2		158
	#9006	96DDE	Magellania venosa	dorsal	A2		162
	#9006	96DDE	Magellania venosa	dorsal	A1		172
	#9006	96DDE	Magellania venosa	dorsal	C2		147
	#9006	96DDE	Magellania venosa	dorsal	C2		136
	#9006	96VDE	Magellania venosa	ventral	A3		196
	#9006	96VDE	Magellania venosa	ventral	A3		198
	#9006	96VDE	Magellania venosa	ventral	A2		144
	#9006	96VDE	Magellania venosa	ventral	A2		150
	#9006	96VDE	Magellania venosa	ventral	A1		150
	#9006	96VDE	Magellania venosa	ventral	C2		117
	#9006	96VDE	Magellania venosa	ventral	C2		121
	#8005	85DDE	Magellania venosa	dorsal	C2			37
	#8005	85DDE	Magellania venosa	dorsal	C2			37.4
	#8005	85DDE	Magellania venosa	dorsal	C2			34.2
	#8005	85DDE	Magellania venosa	dorsal	C2			36.8
	#8005	85DDE	Magellania venosa	dorsal	C2			37.4
	#8005	85DDE	Magellania venosa	dorsal	C2			35.9
	#8005	85DDE	Magellania venosa	dorsal	C2			33.2
	#8005	85DDE	Magellania venosa	dorsal	C2			34.2
	#8005	85DDE	Magellania venosa	dorsal	C2			35.7
	#8005	85DDE	Magellania venosa	dorsal	C2			34.8
	#8005	85DDE	Magellania venosa	dorsal	C2			35.8
	#8005	85DDE	Magellania venosa	dorsal	C2			34.7
	#8005	85DDE	Magellania venosa	dorsal	C2			34.9
	#8005	85DDE	Magellania venosa	dorsal	C2			34.8
	#8005	85DDE	Magellania venosa	dorsal	C2			36.5
	#8005	85DDE	Magellania venosa	dorsal	C2			35.4
	#8005	85DDE	Magellania venosa	dorsal	C2			34.5
	#8005	85DDE	Magellania venosa	dorsal	C2			40.4
	#8005	85DDE	Magellania venosa	dorsal	C2			37.1
	#8005	85DDE	Magellania venosa	dorsal	C2			40.2
	#8005	85DDE	Magellania venosa	dorsal	C2			36
	#8005	85DDE	Magellania venosa	dorsal	A1			28.3
	#8005	85DDE	Magellania venosa	dorsal	A1			26.1
	#8005	85DDE	Magellania venosa	dorsal	A1			32
	#8005	85DDE	Magellania venosa	dorsal	A1			32.1
	#8005	85DDE	Magellania venosa	dorsal	A1			29.1
	#8005	85DDE	Magellania venosa	dorsal	A1			25
	#8005	85DDE	Magellania venosa	dorsal	A1			30
	#8005	85DDE	Magellania venosa	dorsal	A1			27
	#8005	85DDE	Magellania venosa	dorsal	A1			26
	#8005	85DDE	Magellania venosa	dorsal	A1			28
	#8005	85DDE	Magellania venosa	dorsal	A2			18.8
	#8005	85DDE	Magellania venosa	dorsal	A2			17.7
	#8005	85DDE	Magellania venosa	dorsal	A2			21.1
	#8005	85DDE	Magellania venosa	dorsal	A2			17
	#8005	85DDE	Magellania venosa	dorsal	A2			17
	#8005	85DDE	Magellania venosa	dorsal	A2			18
	#8005	85DDE	Magellania venosa	dorsal	A2			20
	#8005	85DDE	Magellania venosa	dorsal	A2			18.9
	#8005	85DDE	Magellania venosa	dorsal	A2			19.1
	#8005	85DDE	Magellania venosa	dorsal	A2			18.4
	#8005	85DDE	Magellania venosa	dorsal	A2			19
	#8005	85DDE	Magellania venosa	dorsal	A2			20.1
	#8005	85DDE	Magellania venosa	dorsal	A2			18
	#8005	85DDE	Magellania venosa	dorsal	A2			19.2
	#8005	85DDE	Magellania venosa	dorsal	A2			19.2
	#8005	85DDE	Magellania venosa	dorsal	A3			20.2
	#8005	85DDE	Magellania venosa	dorsal	A3			18.2
	#8005	85DDE	Magellania venosa	dorsal	A3			20.1
	#8005	85DDE	Magellania venosa	dorsal	A3			20
	#8005	85DDE	Magellania venosa	dorsal	A3			19.4
	#8005	85DDE	Magellania venosa	dorsal	A3			23.1
	#8005	85DDE	Magellania venosa	dorsal	A3			26.2
	#8005	85DDE	Magellania venosa	dorsal	A3			22
	#8005	85DDE	Magellania venosa	dorsal	A3			20
	#8005	85DDE	Magellania venosa	dorsal	A3			24
	#8005	85DDE	Magellania venosa	dorsal	A3			26
	#8005	85DDE	Magellania venosa	dorsal	A3			20
	#8005	85DDE	Magellania venosa	dorsal	A3			24.2
	#8005	85VEE	Magellania venosa	ventral	C2			18.4
	#8005	85VEE	Magellania venosa	ventral	C2			17.1
	#8005	85VEE	Magellania venosa	ventral	C2			16.5
	#8005	85VEE	Magellania venosa	ventral	C2			17.3
	#8005	85VEE	Magellania venosa	ventral	C2			16.4
	#8005	85VEE	Magellania venosa	ventral	C2			17.7
	#8005	85VEE	Magellania venosa	ventral	C2			15.8
	#8005	85VEE	Magellania venosa	ventral	C2			13.6
	#8005	85VEE	Magellania venosa	ventral	C2			18.9
	#8005	85VEE	Magellania venosa	ventral	C2			18.4
	#8005	85VEE	Magellania venosa	ventral	C2			17.7
	#8005	85VEE	Magellania venosa	ventral	A1			22.4
	#8005	85VEE	Magellania venosa	ventral	A1			18.2
	#8005	85VEE	Magellania venosa	ventral	A1			17.1
	#8005	85VEE	Magellania venosa	ventral	A1			18.4
	#8005	85VEE	Magellania venosa	ventral	A1			19.4
	#8005	85VEE	Magellania venosa	ventral	A1			18.9
	#8005	85VEE	Magellania venosa	ventral	A1			20.1
	#8005	85VEE	Magellania venosa	ventral	A1			22.8
	#8005	85VEE	Magellania venosa	ventral	A1			21.4
	#8005	85VEE	Magellania venosa	ventral	A1			22.4
	#8005	85VEE	Magellania venosa	ventral	A1			23.1
	#8005	85VEE	Magellania venosa	ventral	A1			24.3
	#8005	85VEE	Magellania venosa	ventral	A1			23
	#8005	85VEE	Magellania venosa	ventral	A2			18.4
	#8005	85VEE	Magellania venosa	ventral	A2			18.4
	#8005	85VEE	Magellania venosa	ventral	A2			18
	#8005	85VEE	Magellania venosa	ventral	A2			19.2
	#8005	85VEE	Magellania venosa	ventral	A2			18
	#8005	85VEE	Magellania venosa	ventral	A2			18.2
	#8005	85VEE	Magellania venosa	ventral	A2			18
	#8005	85VEE	Magellania venosa	ventral	A2			19
	#8005	85VEE	Magellania venosa	ventral	A2			19
	#8005	85VEE	Magellania venosa	ventral	A2			20.9
	#8005	85VEE	Magellania venosa	ventral	A2			19.7
	#8005	85VEE	Magellania venosa	ventral	A2			18.1
	#8005	85VEE	Magellania venosa	ventral	A3			27.1
	#8005	85VEE	Magellania venosa	ventral	A3			23
	#8005	85VEE	Magellania venosa	ventral	A3			31
	#8005	85VEE	Magellania venosa	ventral	A3			24
	#8005	85VEE	Magellania venosa	ventral	A3			33.1
	#8005	85VEE	Magellania venosa	ventral	A3			28
	#8005	85VEE	Magellania venosa	ventral	A3			25.7
	#8005	85VEE	Magellania venosa	ventral	A3			30.1
	#8005	85VEE	Magellania venosa	ventral	A3			25.5
	#8005	85VEE	Magellania venosa	ventral	A3			23.1
	#8005	85VEE	Magellania venosa	ventral	A3			25.1
	#8005	85VEE	Magellania venosa	ventral	A3			26.5
	#8005	85VEE	Magellania venosa	ventral	A3			26.1
	#8005	85VEE	Magellania venosa	ventral	A3			27.3
	#9006	96DDE	Magellania venosa	dorsal	C2			33.7
	#9006	96DDE	Magellania venosa	dorsal	C2			26.5
	#9006	96DDE	Magellania venosa	dorsal	C2			27
	#9006	96DDE	Magellania venosa	dorsal	C2			34.5
	#9006	96DDE	Magellania venosa	dorsal	C2			28.2
	#9006	96DDE	Magellania venosa	dorsal	C2			33.2
	#9006	96DDE	Magellania venosa	dorsal	C2			38.3
	#9006	96DDE	Magellania venosa	dorsal	C2			40
	#9006	96DDE	Magellania venosa	dorsal	C2			34.9
	#9006	96DDE	Magellania venosa	dorsal	C2			26.2
	#9006	96DDE	Magellania venosa	dorsal	C2			34.5
	#9006	96DDE	Magellania venosa	dorsal	C2			33.5
	#9006	96DDE	Magellania venosa	dorsal	A1			36.1
	#9006	96DDE	Magellania venosa	dorsal	A1			37
	#9006	96DDE	Magellania venosa	dorsal	A1			29
	#9006	96DDE	Magellania venosa	dorsal	A1			31.3
	#9006	96DDE	Magellania venosa	dorsal	A1			35.1
	#9006	96DDE	Magellania venosa	dorsal	A1			34
	#9006	96DDE	Magellania venosa	dorsal	A1			33.5
	#9006	96DDE	Magellania venosa	dorsal	A1			36
	#9006	96DDE	Magellania venosa	dorsal	A1			37.2
	#9006	96DDE	Magellania venosa	dorsal	A1			35
	#9006	96DDE	Magellania venosa	dorsal	A1			33.2
	#9006	96DDE	Magellania venosa	dorsal	A1			35.7
	#9006	96DDE	Magellania venosa	dorsal	A1			37.1
	#9006	96DDE	Magellania venosa	dorsal	A2			31
	#9006	96DDE	Magellania venosa	dorsal	A2			32.6
	#9006	96DDE	Magellania venosa	dorsal	A2			31.1
	#9006	96DDE	Magellania venosa	dorsal	A2			30.1
	#9006	96DDE	Magellania venosa	dorsal	A2			27.5
	#9006	96DDE	Magellania venosa	dorsal	A2			32.6
	#9006	96DDE	Magellania venosa	dorsal	A2			32.8
	#9006	96DDE	Magellania venosa	dorsal	A2			31.3
	#9006	96DDE	Magellania venosa	dorsal	A2			34
	#9006	96DDE	Magellania venosa	dorsal	A2			36.1
	#9006	96DDE	Magellania venosa	dorsal	A2			33.1
	#9006	96DDE	Magellania venosa	dorsal	A3			28.6
	#9006	96DDE	Magellania venosa	dorsal	A3			32.6
	#9006	96DDE	Magellania venosa	dorsal	A3			34.4
	#9006	96DDE	Magellania venosa	dorsal	A3			25.3
	#9006	96DDE	Magellania venosa	dorsal	A3			31.6
	#9006	96DDE	Magellania venosa	dorsal	A3			33.2
	#9006	96DDE	Magellania venosa	dorsal	A3			31.3
	#9006	96DDE	Magellania venosa	dorsal	A3			26.3
	#9006	96DDE	Magellania venosa	dorsal	A3			29.4
	#9006	96DDE	Magellania venosa	dorsal	A3			33.4
	#9006	96DDE	Magellania venosa	dorsal	A3			32.4
	#9006	96DDE	Magellania venosa	dorsal	A3			26
	#9006	96DDE	Magellania venosa	dorsal	A3			26.7
	#9006	96DDE	Magellania venosa	dorsal	A3			29
	#9006	96DDE	Magellania venosa	dorsal	A3			29.1
	#9006	96DDE	Magellania venosa	dorsal	A3			24.3
	#9006	96DDE	Magellania venosa	dorsal	A3			26.1
	#9006	96DDE	Magellania venosa	dorsal	A3			23
	#9006	96DDE	Magellania venosa	dorsal	A3			23.5
	#9006	96VDE	Magellania venosa	ventral	C2			29.4
	#9006	96VDE	Magellania venosa	ventral	C2			31.6
	#9006	96VDE	Magellania venosa	ventral	C2			30.4
	#9006	96VDE	Magellania venosa	ventral	C2			33
	#9006	96VDE	Magellania venosa	ventral	C2			30.4
	#9006	96VDE	Magellania venosa	ventral	C2			29.7
	#9006	96VDE	Magellania venosa	ventral	C2			30.8
	#9006	96VDE	Magellania venosa	ventral	C2			32
	#9006	96VDE	Magellania venosa	ventral	C2			30.8
	#9006	96VDE	Magellania venosa	ventral	C2			30.1
	#9006	96VDE	Magellania venosa	ventral	C2			29.1
	#9006	96VDE	Magellania venosa	ventral	C2			24.3
	#9006	96VDE	Magellania venosa	ventral	C2			28.2
	#9006	96VDE	Magellania venosa	ventral	A1			38.6
	#9006	96VDE	Magellania venosa	ventral	A1			36.1
	#9006	96VDE	Magellania venosa	ventral	A1			40.3
	#9006	96VDE	Magellania venosa	ventral	A1			37
	#9006	96VDE	Magellania venosa	ventral	A1			37.3
	#9006	96VDE	Magellania venosa	ventral	A1			35.5
	#9006	96VDE	Magellania venosa	ventral	A1			41.8
	#9006	96VDE	Magellania venosa	ventral	A1			38.9
	#9006	96VDE	Magellania venosa	ventral	A1			42.6
	#9006	96VDE	Magellania venosa	ventral	A1			42.2
	#9006	96VDE	Magellania venosa	ventral	A1			36.1
	#9006	96VDE	Magellania venosa	ventral	A1			37.5
	#9006	96VDE	Magellania venosa	ventral	A2			40.3
	#9006	96VDE	Magellania venosa	ventral	A2			35.4
	#9006	96VDE	Magellania venosa	ventral	A2			31.3
	#9006	96VDE	Magellania venosa	ventral	A2			33.4
	#9006	96VDE	Magellania venosa	ventral	A2			25.3
	#9006	96VDE	Magellania venosa	ventral	A2			27.2
	#9006	96VDE	Magellania venosa	ventral	A2			35.4
	#9006	96VDE	Magellania venosa	ventral	A2			29.8
	#9006	96VDE	Magellania venosa	ventral	A2			33
	#9006	96VDE	Magellania venosa	ventral	A2			34.5
	#9006	96VDE	Magellania venosa	ventral	A2			32.8
	#9006	96VDE	Magellania venosa	ventral	A2			31.4
	#9006	96VDE	Magellania venosa	ventral	A2			27.2
	#9006	96VDE	Magellania venosa	ventral	A2			38.2
	#9006	96VDE	Magellania venosa	ventral	A3			26.3
	#9006	96VDE	Magellania venosa	ventral	A3			24.5
	#9006	96VDE	Magellania venosa	ventral	A3			22
	#9006	96VDE	Magellania venosa	ventral	A3			27
	#9006	96VDE	Magellania venosa	ventral	A3			28
	#9006	96VDE	Magellania venosa	ventral	A3			29.4
	#9006	96VDE	Magellania venosa	ventral	A3			30
	#9006	96VDE	Magellania venosa	ventral	A3			35.2
	#9006	96VDE	Magellania venosa	ventral	A3			28.1
	#9006	96VDE	Magellania venosa	ventral	A3			33.1
	#9006	96VDE	Magellania venosa	ventral	A3			37.3
	#9006	96VDE	Magellania venosa	ventral	A3			33.4
	#9006	96VDE	Magellania venosa	ventral	A3			32
	#9006	96VDE	Magellania venosa	ventral	A3			37.5
	#9006	96VDE	Magellania venosa	ventral	A3			39.1
	#9006	96VDE	Magellania venosa	ventral	A3			31.1
	#9006	96VDE	Magellania venosa	ventral	A3			32.8
	#9006	96VDE	Magellania venosa	ventral	A3			44.3
	#9006	96VDE	Magellania venosa	ventral	A3			40.8
	#9006	96VDE	Magellania venosa	ventral	A3			38.6
	#9006	96VDE	Magellania venosa	ventral	A3			39.3
	#9006	96VDE	Magellania venosa	ventral	A3			39.8
	#9006	96VDE	Magellania venosa	ventral	A3			39.3
	#9006	96VDE	Magellania venosa	ventral	A3			40
	Position information reference from Figure 6 and Figure 7

## Sheet: C and O isotope
No.	No. of specimen	Species	Valve	No. isotope test	Position (Milan)	Position (Milan)	Position (GEOMAR)	App. distance from margin	δ¹³C (‰V-PDB)	σ δ¹³C (‰V-PDB)	δ¹⁸O (‰V-PDB)	σ δ¹⁸O (‰V-PDB)
	#8005	Magellania venosa	dorsal	8005-e	edge	600 ppm CO2			-1.41994	0.0442676	-5.52851	0.0322908
	#8005	Magellania venosa	dorsal	8005-1	Chile; b-1				-1.53826	0.0392237	-2.67801	0.0702708
	#8005	Magellania venosa	dorsal	8005-2	b-2				-0.290763	0.0549175	-0.190013	0.0376827
	#8005	Magellania venosa	dorsal	8005-3	b-3				0.089058	0.0390336	-0.0476384	0.0558898
	#8005	Magellania venosa	dorsal	8005-4	b-4				-0.190638	0.0556454	-0.149388	0.0434602
	#8005	Magellania venosa	dorsal	8005-5	b-5				-0.294847	0.046263	-0.108138	0.0452891
	#8005	Magellania venosa	dorsal	8005-6	b-6				-0.143656	0.0392786	-0.273388	0.0592856
	#8005	Magellania venosa	dorsal	8005-7	b-7				-0.535972	0.0300464	-0.272388	0.0424962
	#8005	Magellania venosa	dorsal	8005-8	b-8				-0.729013	0.0375119	-0.218299	0.0382398
	#8005	Magellania venosa	dorsal	8005-9	b-9				0.247112	0.0311904	0.206195	0.0671846
	#8005	Magellania venosa	dorsal	8005-10	b-10 umbo area				0.332987	0.0304396	-0.555781	0.0352535
	#8005	Magellania venosa	ventral	8005-e1	p edge-1	600 ppm CO2			-1.33901	0.0394281	-5.69521	0.0405744
	#8005	Magellania venosa	ventral	8005-e2	p edge-2	600 ppm CO2			-1.82476	0.026959	-5.84576	0.0444922
	#8005	Magellania venosa	ventral	8005-1x	p-1				-0.914371	0.0585361	-1.46389	0.0390119
	#8005	Magellania venosa	ventral	8005-2x	p-2				-0.844263	0.0291388	-0.535888	0.0352653
	#8005	Magellania venosa	ventral	8005-3x	p-3				-0.919638	0.055748	-0.492263	0.0539522
	#8005	Magellania venosa	ventral	8005-4x	p-4				-0.778763	0.053665	-0.923763	0.0545748
	#8005	Magellania venosa	ventral	8005-5x	p-5				-2.01689	0.0249567	-0.825013	0.0515612
	#8005	Magellania venosa	ventral	8005-6x	p-6				-0.482013	0.0530202	-0.359638	0.0360231
	#8005	Magellania venosa	ventral	8005-7x	p-7				0.157112	0.0226838	0.143862	0.043507
	#8005	Magellania venosa	ventral	8005-8x	p-8				0.322862	0.0466811	0.0799866	0.034092
	#8005	Magellania venosa	ventral	8005-9x	p-9				0.452612	0.0383422	-0.623888	0.0310288
	#8005	Magellania venosa	ventral	8005-10x	p-10 umbo area				0.360987	0.0505343	-0.867763	0.0481054
	#9006	Magellania venosa	dorsal	9006D-e1	b edge 1	4000 ppm CO2			-21.8244	0.0217313	-5.32897	0.0263626
	#9006	Magellania venosa	dorsal	9006D-e2	be-2	2000 ppm CO2			-19.6872	0.0553935	-5.28534	0.0450222
	#9006	Magellania venosa	dorsal	9006D-e3	be-3	2000 ppm CO2			-19.2976	0.0486928	-5.50309	0.0221515
	#9006	Magellania venosa	dorsal	9006D-e4	be-4	2000 ppm CO2			-17.0519	0.0392396	-5.63309	0.0442429
	#9006	Magellania venosa	dorsal	9006D-eT	bTransition				-8.12631	0.0517927	-4.25247	0.0426891
	#9006	Magellania venosa	dorsal	9006D-1	b-1				-2.94469	0.0620579	-2.16234	0.0433676
	#9006	Magellania venosa	dorsal	9006D-2	b-2				-1.30406	0.0491271	-0.555531	0.0335504
	#9006	Magellania venosa	dorsal	9006D-3	b-3				-0.533312	0.0348602	-0.191469	0.039552
	#9006	Magellania venosa	dorsal	9006D-4	b-4				-1.40556	0.019248	-0.441344	0.0360416
	#9006	Magellania venosa	dorsal	9006D-5	b-5				-3.64694	0.0395506	-1.17934	0.0588791
	#9006	Magellania venosa	dorsal	9006D-6	b-6				-0.870437	0.0404506	-0.0352187	0.0531165
	#9006	Magellania venosa	dorsal	9006D-7	b-7				-1.19319	0.0567863	-0.0492187	0.0503871
	#9006	Magellania venosa	dorsal	9006D-8	b-8 umbo area				-1.15894	0.0269812	0.0460313	0.0398709
	#9006	Magellania venosa	ventral	9006v-e1	p edge-1	4000 ppm CO2			-20.8418	0.041709	-5.32289	0.0343802
	#9006	Magellania venosa	ventral	9006v-e2	pe-2	2000 ppm CO2			-20.8638	0.0490328	-5.73651	0.0344402
	#9006	Magellania venosa	ventral	9006v-e3	pe-3	2000 ppm CO2			-19.9803	0.0449944	-6.08514	0.0491092
	#9006	Magellania venosa	ventral	9006v-e4	pe-4	2000 ppm CO2			-20.1534	0.0658241	-6.33451	0.0444183
	#9006	Magellania venosa	ventral	9006v-eT	p transition				-10.213	0.0388293	-5.32192	0.0402273
	#9006	Magellania venosa	ventral	9006v-1	p-1				-2.17639	0.0346098	-2.00139	0.0248582
	#9006	Magellania venosa	ventral	9006v-2	p-2				-1.67766	0.0521805	-1.15351	0.0504818
	#9006	Magellania venosa	ventral	9006v-3	p-3				-2.99451	0.0352825	-1.47601	0.0203956
	#9006	Magellania venosa	ventral	9006v-4	p-4				-1.36189	0.0402244	-0.829219	0.0282157
	#9006	Magellania venosa	ventral	9006v-5	p-5				-8.04994	0.0451553	-2.88884	0.0366299
	#9006	Magellania venosa	ventral	9006v-6	p-6				-1.62494	0.0337157	-0.354344	0.0336972
	#9006	Magellania venosa	ventral	9006v-7	p-7				-2.58469	0.0364272	-0.572594	0.0179635
	#9006	Magellania venosa	ventral	9006v-8	p-8				-3.12769	0.0268317	-0.693719	0.0346624
	#9006	Magellania venosa	ventral	9006v-9	p-9				-1.53256	0.0390766	-0.124344	0.0516575
	#9006	Magellania venosa	ventral	9006v-10	p-10				-1.67144	0.0385325	-0.0335937	0.0448156
	#9006	Magellania venosa	ventral	9006v-11	p-11				-2.58356	0.0348566	-0.188219	0.0302714
	#9006	Magellania venosa	ventral	9006v-12	p-12				-2.928	0.0377947	-0.433469	0.0426898
	#9006	Magellania venosa	ventral	9006v-13	p-13 umbo area				-3.56406	0.0367166	-1.00334	0.0367166
	#9004	Magellania venosa	ventral	9004-1			Low-pH: 4000 ppm	1	-27.0949	0.031	-6.96929	0.08
	#9004	Magellania venosa	ventral	9004-2			Low-pH: 4000 ppm	2	-24.5289	0.13	-6.18329	0.139
	#9004	Magellania venosa	ventral	9004-3 (4000 ppm border)			Low-pH: 4000 ppm	3	-23.4719	0.054	-6.03529	0.112
	#9004	Magellania venosa	ventral	9004-4			Low-pH: 2000 ppm	4	-22.3089	0.068	-6.23229	0.049
	#9004	Magellania venosa	ventral	9004-5			Low-pH: 2000 ppm	5	-23.371	0.031	-6.096	0.063
	#9004	Magellania venosa	ventral	9004-6			Low-pH: 2000 ppm	6	-23.8449	0.015	-6.62029	0.049
	#9004	Magellania venosa	ventral	9004-7			Low-pH: 2000 ppm	7	-25.0379	0.039	-6.91129	0.062
	#9004	Magellania venosa	ventral	9004-16			Low-pH: 2000 ppm	16	-21.4979	0.019	-6.57429	0.049
	#9004	Magellania venosa	ventral	9004-17			Low-pH: 2000 ppm	17	-21.4579	0.017	-6.56929	0.056
	#9004	Magellania venosa	ventral	9004-18			Low-pH: 2000 ppm	18	-13.6999	0.073	-6.57129	0.081
	#9004	Magellania venosa	ventral	9004-19			Low-pH: 2000 ppm	19	-11.95	0.031	-5.374	0.029
	#9004	Magellania venosa	ventral	9004-20			Low-pH: 2000 ppm	20	-9.68686	0.037	-5.55729	0.078
	#9004	Magellania venosa	ventral	9004-21 (nat. border)			Nature	21	-7.337	0.016	-4.924	0.027
	#9004	Magellania venosa	ventral	9004-29			Nature	29	-9.23886	0.032	-3.04329	0.042
	#9004	Magellania venosa	ventral	9004-umbo			Nature	30	-1.12286	0.075	-0.551286	0.048
	#9005	Magellania venosa	ventral	9005-1			Low-pH: 4000 ppm	1	-25.9099	0.067	-6.56029	0.11
	#9005	Magellania venosa	ventral	9005-2			Low-pH: 4000 ppm	2	-23.7189	0.034	-6.14729	0.068
	#9005	Magellania venosa	ventral	9005-3 (4000 ppm border)			Low-pH: 4000 ppm	3	-22.1459	0.04	-6.00329	0.073
	#9005	Magellania venosa	ventral	9005-4 (equal to 19)			Low-pH: 2000 ppm	19	-12.672	0.048	-5.202	0.045
	#9005	Magellania venosa	ventral	9005-umbo			Nature	30	-3.914	0.028	-1.668	0.053
	#8004	Magellania venosa	ventral	8004-1			Control (to 4000 ppm)	1	-6.79586	0.037	-7.38829	0.073
	#8004	Magellania venosa	ventral	8004-2			Control (to 4000 ppm)	2	-5.34686	0.026	-6.78929	0.04
	#8004	Magellania venosa	ventral	8004-3 (4000 ppm borderr)			Control (to 4000 ppm)	3	-4.59086	0.044	-6.32429	0.035
	#8004	Magellania venosa	ventral	8004-4 (equal to 19)			Control (to 2000 ppm)	19	-3.52886	0.035	-5.37429	0.033
	#8004	Magellania venosa	ventral	8004-umbo			Nature	30	-0.887857	0.036	-2.38729	0.059
	Distance from margin:
	- 0 is the youngest material, the last growth line
	- 30 is the umbo
	drilled the material based on the visible growth lines, each step no. represnets one growth line
